# Supplementary material
Source: MDPI journal article supplement (https://www.mdpi.com/1424-2818/14/2/130)
Supplement: s1 [file s1]

Archive with 2 entries (2 files):
- Table S1. Rattlesnake Telemetry Data.csv
- Table S2. Codebook for Rattlesnake Telemetry Data..pdf
