# Supplementary material
Source: MDPI journal article supplement (https://www.mdpi.com/1424-2818/14/2/130)
Supplement: s1 [file s1 › Table S1. Rattlesnake Telemetry Data.csv]

	snakeID	Type	Date	Time	Lat	Long	X	Y	SHM.dist
1	2	Capture	7/21/2008	11:30:00	34.035983	-117.2233	479387.4085	3766168.195	3.902535638
2	2	Release	8/1/2008	8:23:00	34.033986	-117.224108	479312.338	3765946.933	50.57747765
3	2	1	8/2/2008	7:54:00	34.034133	-117.224217	479302.3117	3765963.254	32.06660513
4	2	2	8/5/2008	20:14:00	34.034133	-117.224217	479302.3117	3765963.254	32.06660513
5	2	3	8/6/2008	18:59:00	34.034133	-117.224217	479302.3117	3765963.254	32.06660513
6	2	4	8/8/2008	7:58:00	34.034133	-117.224217	479302.3117	3765963.254	32.06660513
7	2	5	8/10/2008	7:27:00	34.034133	-117.224217	479302.3117	3765963.254	32.06660513
8	2	6	8/11/2008	20:45:00	34.034133	-117.224217	479302.3117	3765963.254	32.06660513
9	2	7	8/13/2008	7:40:00	34.034133	-117.224217	479302.3117	3765963.254	32.06660513
10	2	8	8/14/2008	19:33:00	34.034133	-117.224217	479302.3117	3765963.254	32.06660513
11	2	9	8/19/2008	19:59:00	34.035383	-117.224	479322.6465	3766101.809	1.676324408
12	2	10	8/20/2008	19:44:00	34.035383	-117.224	479322.6465	3766101.809	1.676324408
13	2	11	8/27/2008	8:25:00	34.035367	-117.22395	479327.2581	3766100.025	3.56472325
14	2	12	8/29/2008	9:15:00	34.035367	-117.22395	479327.2581	3766100.025	3.56472325
15	2	13	9/2/2008	10:36:00	34.035283	-117.223967	479325.6685	3766090.714	11.39436517
16	2	14	9/3/2008	8:08:00	34.035567	-117.222533	479458.1093	3766121.915	23.63052602
17	2	15	9/5/2008	8:05:00	34.035533	-117.222567	479454.9626	3766118.152	24.84279305
18	2	16	9/8/2008	8:49:00	34.035733	-117.222567	479455.0108	3766140.328	4.992892388
19	2	17	9/9/2008	8:24:00	34.035733	-117.22275	479438.1182	3766140.365	11.93337558
20	2	18	9/11/2008	8:48:00	34.035733	-117.22275	479438.1182	3766140.365	11.93337558
21	2	19	9/16/2008	8:57:00	34.035483	-117.2229	479424.2114	3766112.675	19.05492485
22	2	20	9/22/2008	8:44:00	34.03555	-117.22265	479447.305	3766120.054	17.27110954
23	2	21	9/24/2008	15:43:00	34.035483	-117.2229	479424.2114	3766112.675	19.05492485
24	2	22	9/29/2008	10:55:00	34.035592	-117.223856	479335.9898	3766124.953	3.01475613
25	2	Relocate	9/29/2008	11:21:00	34.034133	-117.224217	479302.3117	3765963.254	32.06660513
26	2	23	10/1/2008	9:47:00	34.034183	-117.2245	479276.1998	3765968.855	11.43291699
27	2	24	10/5/2008	17:43:00	34.034217	-117.224383	479287.0085	3765972.601	14.54668459
28	2	25	10/8/2008	8:55:00	34.03495	-117.22415	479308.6949	3766053.829	26.68710542
29	2	26	10/13/2008	9:07:00	34.035367	-117.223917	479330.3044	3766100.018	6.323401083
30	2	27	10/15/2008	8:58:00	34.035367	-117.223917	479330.3044	3766100.018	6.323401083
31	2	28	10/20/2008	16:16:00	34.035367	-117.223917	479330.3044	3766100.018	6.323401083
32	2	29	10/22/2008	16:22:00	34.035367	-117.223917	479330.3044	3766100.018	6.323401083
33	2	30	10/31/2008	15:53:00	34.03555	-117.224001	479322.5947	3766120.326	0.90582999
34	2	31	11/6/2008	15:57:00	34.03555	-117.224001	479322.5947	3766120.326	0.90582999
35	2	32	11/13/2008	16:10:00	34.03555	-117.224001	479322.5947	3766120.326	0.90582999
36	2	33	11/20/2008	15:58:00	34.03555	-117.224001	479322.5947	3766120.326	0.90582999
37	2	34	12/8/2008	15:34:00	34.03555	-117.224001	479322.5947	3766120.326	0.90582999
38	2	35	12/21/2008	13:56:00	34.03555	-117.224001	479322.5947	3766120.326	0.90582999
39	2	36	1/1/2009	13:35:00	34.03555	-117.224001	479322.5947	3766120.326	0.90582999
40	2	37	1/11/2009	15:39:00	34.03555	-117.224001	479322.5947	3766120.326	0.90582999
41	2	38	1/18/2009	14:16:00	34.03555	-117.224001	479322.5947	3766120.326	0.90582999
42	2	39	1/27/2009	14:43:00	34.03555	-117.224001	479322.5947	3766120.326	0.90582999
43	2	40	2/3/2009	14:18:00	34.03555	-117.224001	479322.5947	3766120.326	0.90582999
44	2	41	2/10/2009	10:24:00	34.03555	-117.224001	479322.5947	3766120.326	0.90582999
45	2	42	2/17/2009	11:23:00	34.03555	-117.224001	479322.5947	3766120.326	0.90582999
46	2	43	2/22/2009	13:37:00	34.03555	-117.224001	479322.5947	3766120.326	0.90582999
47	2	44	3/1/2009	16:13:00	34.03555	-117.224001	479322.5947	3766120.326	0.90582999
48	2	45	3/8/2009	12:10:00	34.03555	-117.224001	479322.5947	3766120.326	0.90582999
49	2	46	3/15/2009	12:09:00	34.03555	-117.224001	479322.5947	3766120.326	0.90582999
50	2	47	3/23/2009	12:47:00	34.035482	-117.223915	479330.5169	3766112.769	1.875882665
51	2	Relocate	3/23/2009	12:55:00	34.0343	-117.224117	479311.5834	3765981.751	34.02274547
52	2	48	3/29/2009	16:56:00	34.034183	-117.224067	479316.1705	3765968.768	41.34761554
53	2	49	4/2/2009	10:40:00	34.034183	-117.224067	479316.1705	3765968.768	41.34761554
54	2	50	4/7/2009	10:16:00	34.03405	-117.224	479322.3231	3765954.007	53.67391251
55	2	51	4/10/2009	11:43:00	34.03445	-117.2232	479396.2688	3765998.197	101.7295263
56	2	52	4/14/2009	10:32:00	34.03455	-117.223283	479388.6312	3766009.302	88.40926017
57	2	53	4/17/2009	22:03:00	34.0346	-117.223086	479406.8285	3766014.806	98.53536567
58	2	54	4/21/2009	9:50:00	34.035567	-117.222733	479439.6474	3766121.955	10.19540567
59	2	55	4/28/2009	16:18:00	34.035165	-117.222207	479488.1055	3766077.276	72.5661776
60	2	56	5/1/2009	10:19:00	34.035183	-117.222233	479485.7098	3766079.277	71.82560206
61	2	57	5/5/2009	17:35:00	34.034983	-117.222167	479491.7541	3766057.088	90.11096362
62	2	58	5/12/2009	10:06:00	34.03515	-117.22225	479484.1326	3766075.622	74.41789167
63	2	59	5/21/2009	15:04:00	34.035567	-117.222533	479458.1093	3766121.915	23.63052602
64	2	60	5/31/2009	10:44:00	34.035567	-117.222533	479458.1093	3766121.915	23.63052602
65	2	61	6/5/2009	10:18:00	34.035567	-117.222533	479458.1093	3766121.915	23.63052602
66	2	62	6/10/2009	10:09:00	34.035567	-117.222533	479458.1093	3766121.915	23.63052602
67	2.1	Capture	6/10/2009	10:09:00	34.035567	-117.222533	479458.1093	3766121.915	23.63052602
68	2.1	Release	10/13/2009	14:30:00	34.045417	-117.274283	474684.0115	3767225.668	182.9570209
69	2.1	63	10/14/2009	9:09:00	34.045467	-117.274233	474688.6413	3767231.199	175.7550915
70	2.1	64	10/15/2009	9:16:00	34.047067	-117.273967	474713.6678	3767408.54	35.176312
71	2.1	65	10/16/2009	7:15:00	34.047067	-117.273967	474713.6678	3767408.54	35.176312
72	2.1	66	10/20/2009	7:28:00	34.047067	-117.273967	474713.6678	3767408.54	35.176312
73	2.1	67	10/21/2009	10:54:00	34.047067	-117.273967	474713.6678	3767408.54	35.176312
74	2.1	Last	10/27/2009	7:39:00	34.0477	-117.273083	474795.4458	3767478.509	32.33234771
75	3	Capture	7/27/2008	10:30:00	34.04345	-117.2687	475198.7445	3767006.201	2.869989538
76	3	Release	8/1/2008	21:24:00	34.043317	-117.269917	475086.375	3766991.75	96.35683298
77	3	1	8/3/2008	20:39:00	34.043483	-117.26965	475111.068	3767010.091	68.34031993
78	3	2	8/5/2008	19:33:00	34.0437	-117.269717	475104.9472	3767034.168	62.60260775
79	3	3	8/6/2008	20:37:00	34.044	-117.269517	475123.495	3767067.383	31.47992191
80	3	4	8/8/2008	6:45:00	34.044083	-117.26945	475129.7034	3767076.57	20.42713145
81	3	5	8/10/2008	6:55:00	34.04415	-117.269567	475118.9238	3767084.027	25.22383655
82	3	6	8/11/2008	21:15:00	34.0436	-117.269233	475149.5917	3767022.962	31.2839767
83	3	7	8/14/2008	22:40:00	34.043733	-117.26885	475184.9817	3767037.616	8.779292421
84	3	8	8/26/2008	20:27:00	34.044083	-117.269567	475118.9042	3767076.598	28.54811529
85	3	9	8/27/2008	9:31:00	34.04415	-117.269467	475128.1538	3767084.003	16.7878193
86	3	10	8/29/2008	7:35:00	34.043383	-117.269683	475107.9928	3766999.011	74.13633837
87	3	11	9/2/2008	7:58:00	34.04365	-117.27085	475000.3556	3767028.9	155.8712323
88	3	12	9/4/2008	7:56:00	34.044167	-117.270467	475035.8584	3767086.131	107.0774779
89	3	13	9/8/2008	7:20:00	34.04475	-117.2707	475014.5234	3767150.831	130.4916166
90	3	14	9/10/2008	7:14:00	34.044867	-117.270567	475026.8335	3767163.771	113.4790568
91	3	15	9/16/2008	8:03:00	34.043583	-117.268983	475172.662	3767021.017	9.522153482
92	3	Relocate	9/19/2008	9:13:00	34.043417	-117.269667	475109.4796	3767002.777	71.93434515
93	3	16	9/19/2008	20:43:00	34.043033	-117.268117	475252.4349	3766959.823	7.340465063
94	3	17	9/23/2008	17:07:00	34.043483	-117.269917	475086.4236	3767010.156	89.02531999
95	3	18	9/25/2008	16:05:00	34.04315	-117.2702	475060.2049	3766973.302	125.3833497
96	3	19	10/1/2008	8:15:00	34.043683	-117.270283	475052.6999	3767032.421	108.1379251
97	3	20	10/2/2008	9:21:00	34.043683	-117.27025	475055.7459	3767032.413	105.6191544
98	3	21	10/7/2008	10:14:00	34.044083	-117.269367	475137.3643	3767076.55	16.62973856
99	3	22	10/9/2008	9:29:00	34.044033	-117.26935	475138.9188	3767071.001	21.62310854
100	3	Relocate	10/9/2008	10:11:00	34.043367	-117.269833	475094.143	3766997.273	88.03922406
101	3	23	10/14/2008	18:12:00	34.043467	-117.270033	475075.712	3767008.41	99.35427471
102	3	24	10/16/2008	9:39:00	34.043433	-117.270017	475077.1788	3767004.636	99.78233476
103	3	25	10/21/2008	16:44:00	34.04295	-117.270383	475043.2551	3766951.171	148.0780686
104	3	26	10/24/2008	17:00:00	34.04295	-117.270383	475043.2551	3766951.171	148.0780686
105	3	27	10/29/2008	15:27:00	34.043267	-117.2702	475060.2391	3766986.275	122.9680781
106	3	28	11/7/2008	13:21:00	34.043867	-117.2706	475023.4945	3767052.9	125.598049
107	3	29	11/17/2008	7:30:00	34.044117	-117.270617	475021.9987	3767080.624	121.3217142
108	3	30	11/21/2008	13:37:00	34.044117	-117.270617	475021.9987	3767080.624	121.3217142
109	3	31	12/5/2008	14:00:00	34.0441	-117.270517	475031.2237	3767078.714	112.3574824
110	3	32	12/18/2008	14:55:00	34.0441	-117.270517	475031.2237	3767078.714	112.3574824
111	3	33	1/2/2009	13:22:00	34.0441	-117.270517	475031.2237	3767078.714	112.3574824
112	3	34	1/8/2009	13:53:00	34.0441	-117.270517	475031.2237	3767078.714	112.3574824
113	3	35	1/15/2009	14:38:00	34.043867	-117.270583	475025.0636	3767052.896	124.1103166
114	3	36	1/22/2009	14:33:00	34.043867	-117.270583	475025.0636	3767052.896	124.1103166
115	3	37	1/29/2009	15:06:00	34.043867	-117.270583	475025.0636	3767052.896	124.1103166
116	3	38	2/6/2009	10:41:00	34.043867	-117.270583	475025.0636	3767052.896	124.1103166
117	3	39	2/15/2009	11:05:00	34.043867	-117.270583	475025.0636	3767052.896	124.1103166
118	3	40	2/20/2009	10:31:00	34.043867	-117.270583	475025.0636	3767052.896	124.1103166
119	3	41	2/27/2009	10:28:00	34.043867	-117.270583	475025.0636	3767052.896	124.1103166
120	3	42	3/6/2009	11:14:00	34.043567	-117.271017	474984.917	3767019.738	173.7139551
121	3	43	3/13/2009	13:02:00	34.04355	-117.271017	474984.912	3767017.853	174.5140525
122	3	44	3/19/2009	9:57:00	34.043883	-117.270633	475020.4532	3767054.682	127.9546114
123	3	45	3/27/2009	11:28:00	34.04385	-117.270583	475025.0586	3767051.011	124.7260192
124	3	46	3/31/2009	11:09:00	34.04385	-117.270583	475025.0586	3767051.011	124.7260192
125	3	47	4/5/2009	15:14:00	34.04385	-117.270583	475025.0586	3767051.011	124.7260192
126	3	48	4/9/2009	12:22:00	34.04385	-117.270583	475025.0586	3767051.011	124.7260192
127	3	49	4/12/2009	10:27:00	34.04385	-117.270583	475025.0586	3767051.011	124.7260192
128	3	50	4/16/2009	0:56:00	34.04385	-117.270583	475025.0586	3767051.011	124.7260192
129	3	51	4/19/2009	10:11:00	34.04385	-117.270583	475025.0586	3767051.011	124.7260192
130	3	52	4/22/2009	18:28:00	34.0437	-117.27035	475046.5207	3767034.322	112.3432697
131	3	53	4/29/2009	10:07:00	34.043583	-117.27035	475046.4865	3767021.349	119.5812696
132	3	54	5/3/2009	17:09:00	34.0445	-117.270183	475062.1692	3767122.985	80.55460674
133	3	55	5/7/2009	19:41:00	34.044817	-117.270617	475022.2039	3767158.239	120.261106
134	3	56	5/19/2009	10:27:00	34.04425	-117.2702	475060.5269	3767095.269	82.28654906
135	3	57	5/24/2009	10:06:00	34.04325	-117.270583	475024.8827	3766984.483	155.5287922
136	3	58	6/1/2009	15:35:00	34.044533	-117.270217	475059.0406	3767126.652	83.91538926
137	3	59	6/8/2009	9:30:00	34.0447	-117.270783	475006.8478	3767145.307	137.6993433
138	3	60	6/14/2009	10:05:00	34.04465	-117.271083	474979.1432	3767139.836	164.7692957
139	3	61	6/21/2009	18:28:00	34.04525	-117.272517	474846.9623	3767206.715	143.4355373
140	3	62	7/2/2009	19:37:00	34.043883	-117.270283	475052.7585	3767054.597	97.57126972
141	3	Release	7/8/2009	19:30:00	34.043362	-117.269739	475102.8178	3766996.696	79.52124183
142	3	63	7/15/2009	19:57:00	34.0437	-117.2702	475060.3659	3767034.285	100.7576733
143	3	64	7/22/2009	7:31:00	34.04365	-117.27025	475055.7362	3767028.754	107.7431735
144	3	65	7/28/2009	20:05:00	34.04365	-117.27025	475055.7362	3767028.754	107.7431735
145	3	66	8/6/2009	8:10:00	34.044883	-117.270667	475017.6083	3767165.57	120.7725416
146	3	67	8/11/2009	19:50:00	34.044383	-117.271367	474952.8515	3767110.301	189.4022141
147	3	68	8/18/2009	7:55:00	34.044667	-117.27175	474917.5842	3767141.885	217.8692945
148	3	69	8/24/2009	18:42:00	34.044783	-117.27125	474963.7682	3767154.624	174.3966138
149	3	70	9/1/2009	7:20:00	34.04555	-117.272017	474893.2003	3767239.856	125.9204915
150	3	71	9/8/2009	19:27:00	34.045117	-117.271567	474934.6074	3767191.735	174.6953027
151	3	72	9/15/2009	7:44:00	34.044683	-117.270833	475002.2278	3767143.434	142.1476564
152	3	73	9/23/2009	8:52:00	34.044083	-117.2704	475042.0179	3767076.801	101.9235545
153	3	74	9/30/2009	8:19:00	34.043717	-117.268667	475201.8681	3767035.798	5.433817345
154	3	Relocate	9/30/2009	8:34:00	34.0434	-117.2697	475106.4287	3767000.9	75.27768971
155	3	75	10/9/2009	20:49:00	34.043383	-117.269767	475100.2395	3766999.031	81.71304674
156	3	76	10/14/2009	10:50:00	34.043317	-117.270483	475034.1325	3766991.888	144.001942
157	3	77	10/20/2009	11:01:00	34.04405	-117.27035	475046.6233	3767073.13	98.02468402
158	3	78	10/21/2009	7:37:00	34.04405	-117.27035	475046.6233	3767073.13	98.02468402
159	3	79	10/27/2009	8:16:00	34.0447	-117.270717	475012.9396	3767145.291	131.6325791
160	3	80	10/28/2009	9:26:00	34.0447	-117.270717	475012.9396	3767145.291	131.6325791
161	3	81	11/3/2009	8:13:00	34.0447	-117.270717	475012.9396	3767145.291	131.6325791
162	3	82	11/5/2009	9:09:00	34.0447	-117.270717	475012.9396	3767145.291	131.6325791
163	3	83	11/10/2009	11:02:00	34.044783	-117.2704	475042.223	3767154.417	102.7320652
164	3	84	11/12/2009	10:30:00	34.044783	-117.2704	475042.223	3767154.417	102.7320652
165	3	85	11/17/2009	12:42:00	34.0446	-117.2704	475042.1694	3767134.126	101.5433423
166	3	86	11/20/2009	9:31:00	34.0446	-117.2704	475042.1694	3767134.126	101.5433423
167	3	87	11/24/2009	12:05:00	34.0446	-117.2704	475042.1694	3767134.126	101.5433423
168	3	88	12/4/2009	9:37:00	34.0446	-117.2704	475042.1694	3767134.126	101.5433423
169	3	89	12/9/2009	12:20:00	34.0446	-117.2704	475042.1694	3767134.126	101.5433423
170	3	90	12/16/2009	12:06:00	34.0446	-117.2704	475042.1694	3767134.126	101.5433423
171	3	91	12/22/2009	12:36:00	34.044283	-117.270233	475057.4906	3767098.936	85.35710671
172	3	92	12/29/2009	10:56:00	34.044283	-117.270233	475057.4906	3767098.936	85.35710671
173	3	93	1/5/2010	12:50:00	34.044133	-117.27045	475037.4175	3767082.357	105.8080217
174	3	94	1/12/2010	10:35:00	34.04415	-117.270517	475031.2384	3767084.258	111.8089319
175	3	95	1/19/2010	10:54:00	34.04415	-117.270633	475020.5315	3767084.287	122.4887492
176	3	96	1/26/2010	12:34:00	34.04415	-117.270633	475020.5315	3767084.287	122.4887492
177	3	97	2/2/2010	10:51:00	34.04415	-117.270633	475020.5315	3767084.287	122.4887492
178	3	98	2/11/2010	10:46:00	34.04415	-117.270633	475020.5315	3767084.287	122.4887492
179	3	99	2/16/2010	10:51:00	34.04415	-117.270417	475040.4684	3767084.234	102.6067377
180	3	100	2/23/2010	10:07:00	34.04435	-117.270617	475022.067	3767106.459	120.2097939
181	3	101	3/2/2010	10:41:00	34.04435	-117.270617	475022.067	3767106.459	120.2097939
182	3	102	3/4/2010	11:02:00	34.044433	-117.27065	475019.0454	3767115.67	123.3831047
183	3	103	3/9/2010	10:37:00	34.044433	-117.27065	475019.0454	3767115.67	123.3831047
184	3	104	3/12/2010	9:58:00	34.044483	-117.27065	475019.0601	3767121.214	123.5985831
185	3	105	3/16/2010	11:38:00	34.0446	-117.27065	475019.0944	3767134.187	124.4278812
186	3	106	3/18/2010	10:42:00	34.0446	-117.27065	475019.0944	3767134.187	124.4278812
187	3	107	3/24/2010	11:42:00	34.04429	-117.27087	474998.6974	3767099.868	143.8437459
188	3	108	3/31/2010	9:19:00	34.044889	-117.270484	475034.5008	3767166.19	105.6291954
189	3	109	4/7/2010	11:29:00	34.044283	-117.2714	474949.7762	3767099.221	192.7227224
190	3	110	4/9/2010	10:21:00	34.044267	-117.27145	474945.1565	3767097.459	197.43196
191	3	111	4/13/2010	11:18:00	34.044267	-117.27145	474945.1565	3767097.459	197.43196
192	3	112	4/15/2010	12:13:00	34.04445	-117.27155	474935.9803	3767117.775	206.4546366
193	3	113	4/20/2010	10:35:00	34.044817	-117.27125	474963.7782	3767158.394	172.8588306
194	3	114	4/22/2010	13:44:00	34.044817	-117.27125	474963.7782	3767158.394	172.8588306
195	3	115	4/27/2010	11:44:00	34.044717	-117.271317	474957.5647	3767147.322	182.9318555
196	3	116	4/29/2010	11:05:00	34.044717	-117.271317	474957.5647	3767147.322	182.9318555
197	3	117	5/4/2010	11:51:00	34.045317	-117.271567	474934.6663	3767213.911	164.1437157
198	3	118	5/6/2010	10:28:00	34.045467	-117.27175	474917.8197	3767230.588	147.1292694
199	3	119	5/11/2010	11:42:00	34.045517	-117.27205	474890.1448	3767236.206	127.6554885
200	3	120	5/13/2010	10:48:00	34.045633	-117.271917	474902.4547	3767249.035	123.1762373
201	3	121	5/18/2010	11:59:00	34.04565	-117.271917	474902.4597	3767250.92	121.6506663
202	3	122	5/20/2010	13:07:00	34.04555	-117.271883	474905.5684	3767239.824	132.5103135
203	3	123	5/25/2010	11:30:00	34.045483	-117.271883	474905.5487	3767232.395	138.6972311
204	3	124	5/27/2010	15:37:00	34.045483	-117.271883	474905.5487	3767232.395	138.6972311
205	3	125	6/1/2010	11:39:00	34.045233	-117.271333	474956.2396	3767204.54	149.5608002
206	3	126	6/3/2010	11:58:00	34.04515	-117.271417	474948.4621	3767195.358	161.0434863
207	3	127	6/10/2010	10:24:00	34.0458	-117.272267	474870.1994	3767267.638	90.60621831
208	3	128	9/21/2010	9:21:00	34.043833	-117.269017	475169.5966	3767048.745	3.020748851
209	3	Release	10/4/2010	8:22:00	34.04435	-117.27015	475065.1712	3767106.345	77.12477569
210	3	129	10/11/2010	9:31:00	34.044467	-117.27035	475046.7454	3767119.366	95.90067458
211	3	130	10/13/2010	9:36:00	34.044783	-117.270683	475016.1021	3767154.486	127.4239579
212	3	131	10/18/2010	9:26:00	34.044633	-117.2708	475005.2591	3767137.882	138.6183549
213	3	132	10/27/2010	9:04:00	34.044633	-117.2708	475005.2591	3767137.882	138.6183549
214	3	133	11/3/2010	8:05:00	34.044133	-117.270617	475022.0033	3767082.398	121.1595548
215	3	134	11/12/2010	10:01:00	34.044133	-117.270617	475022.0033	3767082.398	121.1595548
216	3	135	11/19/2010	9:19:00	34.044133	-117.270617	475022.0033	3767082.398	121.1595548
217	3	136	12/1/2010	9:19:00	34.044133	-117.270617	475022.0033	3767082.398	121.1595548
218	3	137	12/8/2010	8:25:00	34.044133	-117.270617	475022.0033	3767082.398	121.1595548
219	3	138	12/15/2010	10:22:00	34.044133	-117.270617	475022.0033	3767082.398	121.1595548
220	3	139	12/30/2010	13:10:00	34.044133	-117.270617	475022.0033	3767082.398	121.1595548
221	3	140	1/6/2011	10:28:00	34.044133	-117.270617	475022.0033	3767082.398	121.1595548
222	3	141	1/13/2011	9:09:00	34.044133	-117.270617	475022.0033	3767082.398	121.1595548
223	3	142	1/20/2011	9:45:00	34.044133	-117.270617	475022.0033	3767082.398	121.1595548
224	3	143	1/27/2011	10:29:00	34.044133	-117.270617	475022.0033	3767082.398	121.1595548
225	3	144	2/3/2011	9:16:00	34.044133	-117.270617	475022.0033	3767082.398	121.1595548
226	3	145	2/10/2011	11:07:00	34.044133	-117.270617	475022.0033	3767082.398	121.1595548
227	3	146	2/17/2011	10:34:00	34.044133	-117.270617	475022.0033	3767082.398	121.1595548
228	3	147	2/24/2011	10:01:00	34.044133	-117.270617	475022.0033	3767082.398	121.1595548
229	3	148	3/3/2011	9:27:00	34.044133	-117.270617	475022.0033	3767082.398	121.1595548
230	3	149	3/10/2011	11:31:00	34.044133	-117.270617	475022.0033	3767082.398	121.1595548
231	3	150	3/15/2011	11:37:00	34.044133	-117.270467	475035.8484	3767082.361	107.3699369
232	3	151	3/17/2011	9:05:00	34.044133	-117.270467	475035.8484	3767082.361	107.3699369
233	3	152	3/22/2011	10:26:00	34.044133	-117.270467	475035.8484	3767082.361	107.3699369
234	3	153	3/24/2011	10:57:00	34.044133	-117.270467	475035.8484	3767082.361	107.3699369
235	3	154	3/29/2011	9:55:00	34.04405	-117.270383	475043.5773	3767073.138	101.0122274
236	3	155	3/31/2011	10:00:00	34.043833	-117.270417	475040.3755	3767049.085	111.1226843
237	3	156	4/5/2011	10:00:00	34.0438	-117.270433	475038.8891	3767045.43	113.9471082
238	3	157	4/12/2011	10:05:00	34.043733	-117.2707	475014.2251	3767038.066	139.4998169
239	3	158	4/14/2011	8:38:00	34.043733	-117.2707	475014.2251	3767038.066	139.4998169
240	3	159	4/19/2011	11:47:00	34.044417	-117.27055	475028.2707	3767113.871	114.0817027
241	3	160	4/21/2011	9:47:00	34.044567	-117.270683	475016.0388	3767130.536	127.091998
242	3	161	4/26/2011	11:27:00	34.04495	-117.271533	474937.6965	3767173.21	182.5755439
243	3	162	4/28/2011	12:10:00	34.044933	-117.271783	474914.6166	3767171.387	196.604332
244	3	163	5/3/2011	10:32:00	34.045233	-117.271567	474934.6416	3767204.597	168.3002821
245	3	164	5/10/2011	10:29:00	34.045633	-117.272133	474882.5181	3767249.088	112.707347
246	3	165	5/19/2011	10:13:00	34.045683	-117.27255	474844.0443	3767254.734	95.42606595
247	3	166	6/8/2011	9:11:00	34.04475	-117.2705	475032.9833	3767150.782	112.0434703
248	3	167	6/15/2011	11:36:00	34.044167	-117.270617	475022.0133	3767086.168	120.9004662
249	3	168	6/22/2011	12:45:00	34.044167	-117.270617	475022.0133	3767086.168	120.9004662
250	3	169	6/28/2011	9:38:00	34.044167	-117.270617	475022.0133	3767086.168	120.9004662
251	3	170	7/5/2011	9:53:00	34.043433	-117.270317	475049.4885	3767004.709	124.7969853
252	3	171	7/26/2011	9:52:00	34.043417	-117.27065	475018.7475	3767003.016	152.7972977
253	3	172	8/12/2011	9:12:00	34.043417	-117.27065	475018.7475	3767003.016	152.7972977
254	3	173	8/21/2011	9:52:00	34.043417	-117.27065	475018.7475	3767003.016	152.7972977
255	3	174	8/26/2011	8:38:00	34.043417	-117.27065	475018.7475	3767003.016	152.7972977
256	3	175	9/2/2011	8:18:00	34.043417	-117.27065	475018.7475	3767003.016	152.7972977
257	3	176	9/12/2011	9:28:00	34.043417	-117.27065	475018.7475	3767003.016	152.7972977
258	3	177	9/20/2011	10:54:00	34.043417	-117.27065	475018.7475	3767003.016	152.7972977
259	3	178	9/27/2011	9:53:00	34.04495	-117.2711	474977.6622	3767173.104	152.6322956
260	3	179	10/4/2011	9:43:00	34.0451	-117.271133	474974.6604	3767189.744	143.3859993
261	3	180	10/12/2011	8:35:00	34.044659	-117.271211	474967.3314	3767140.866	176.6183142
262	3	Final_Release	10/17/2011	8:15:00	34.044904	-117.271023	474984.7558	3767167.985	150.0078524
263	4	Capture	8/1/2008	20:01:00	34.029683	-117.218983	479784.4128	3765468.797	459.5331054
264	4	Release	8/8/2008	20:18:00	34.029683	-117.218983	479784.4128	3765468.797	459.5331054
265	4	1	8/10/2008	8:32:00	34.029567	-117.218967	479785.8624	3765455.932	468.3380697
266	4	2	8/11/2008	19:57:00	34.029217	-117.21875	479805.8121	3765417.081	446.366971
267	4	3	8/13/2008	7:05:00	34.029217	-117.218733	479807.3814	3765417.078	445.804946
268	4	4	8/14/2008	8:48:00	34.029167	-117.218767	479804.2308	3765411.541	441.7733754
269	4	5	8/18/2008	7:19:00	34.029217	-117.218733	479807.3814	3765417.078	445.804946
270	4	6	8/20/2008	7:43:00	34.029217	-117.218733	479807.3814	3765417.078	445.804946
271	4	7	8/20/2008	20:42:00	34.029217	-117.218733	479807.3814	3765417.078	445.804946
272	4	8	8/27/2008	7:42:00	34.027867	-117.218967	479785.4593	3765267.438	322.1960696
273	4	9	8/29/2008	9:53:00	34.027617	-117.218933	479788.5388	3765239.711	297.7654956
274	4	10	9/1/2008	18:39:00	34.027467	-117.218917	479789.9803	3765223.076	283.6667587
275	4	11	9/3/2008	9:14:00	34.027933	-117.2193	479754.7331	3765274.822	346.1530852
276	4	12	9/5/2008	9:53:00	34.02845	-117.2192	479764.0876	3765332.126	388.2186242
277	4	13	9/9/2008	9:02:00	34.02905	-117.219067	479776.5081	3765398.627	440.9330078
278	4	14	9/11/2008	8:09:00	34.02955	-117.218983	479784.3813	3765454.05	470.7316204
279	4	15	9/17/2008	10:09:00	34.029583	-117.2189	479792.0514	3765457.693	463.0162881
280	4	16	9/22/2008	8:03:00	34.028433	-117.219183	479765.6529	3765330.238	385.7926001
281	4	17	9/24/2008	5:58:00	34.02845	-117.219217	479762.5182	3765332.13	389.038815
282	4	18	9/29/2008	8:40:00	34.02845	-117.219217	479762.5182	3765332.13	389.038815
283	4	19	10/1/2008	9:12:00	34.028067	-117.219117	479771.659	3765289.643	348.3234784
284	4	20	10/5/2008	5:13:00	34.028267	-117.219433	479742.5342	3765311.881	383.1924413
285	4	21	10/8/2008	8:15:00	34.02845	-117.2192	479764.0876	3765332.126	388.2186242
286	4	22	10/13/2008	8:35:00	34.029	-117.2191	479773.4498	3765393.09	437.2721989
287	4	23	10/15/2008	7:58:00	34.028933	-117.2191	479773.4339	3765385.661	430.6180285
288	4	24	10/20/2008	16:56:00	34.028983	-117.219133	479770.3993	3765391.211	436.9390026
289	4	25	10/22/2008	17:02:00	34.02895	-117.21915	479768.8221	3765387.556	434.3839766
290	4	26	10/31/2008	16:29:00	34.0293	-117.218867	479795.0307	3765426.307	458.8902669
291	4	27	11/6/2008	17:21:00	34.029183	-117.218933	479788.9101	3765413.348	449.2564512
292	4	28	11/14/2008	16:59:00	34.029267	-117.21885	479796.5923	3765422.645	454.9102089
293	4	29	11/20/2008	16:51:00	34.0296	-117.2189	479792.0554	3765459.578	461.5647808
294	4	30	12/10/2008	15:17:00	34.0296	-117.2189	479792.0554	3765459.578	461.5647808
295	4	31	12/21/2008	14:34:00	34.0296	-117.2189	479792.0554	3765459.578	461.5647808
296	4	32	1/5/2009	16:37:00	34.0296	-117.2189	479792.0554	3765459.578	461.5647808
297	4	33	1/12/2009	12:04:00	34.0296	-117.2189	479792.0554	3765459.578	461.5647808
298	4	34	1/19/2009	15:50:00	34.0296	-117.2189	479792.0554	3765459.578	461.5647808
299	4	35	1/27/2009	15:40:00	34.0296	-117.2189	479792.0554	3765459.578	461.5647808
300	4	36	2/3/2009	15:10:00	34.0296	-117.2189	479792.0554	3765459.578	461.5647808
301	4	37	2/10/2009	11:06:00	34.0296	-117.2189	479792.0554	3765459.578	461.5647808
302	4	38	2/17/2009	11:02:00	34.0296	-117.2189	479792.0554	3765459.578	461.5647808
303	4	39	2/22/2009	14:15:00	34.0296	-117.2189	479792.0554	3765459.578	461.5647808
304	4	40	3/1/2009	16:55:00	34.0296	-117.218917	479790.486	3765459.581	462.5694754
305	4	41	3/8/2009	12:56:00	34.0296	-117.2189	479792.0554	3765459.578	461.5647808
306	4	42	3/15/2009	12:59:00	34.0296	-117.2189	479792.0554	3765459.578	461.5647808
307	4	43	3/23/2009	13:50:00	34.028867	-117.219117	479771.8489	3765378.346	424.8044327
308	4	44	3/29/2009	18:04:00	34.02845	-117.219133	479770.2728	3765332.113	385.0338097
309	4	45	4/2/2009	11:34:00	34.02845	-117.219133	479770.2728	3765332.113	385.0338097
310	4	46	4/7/2009	11:19:00	34.028283	-117.219483	479737.9221	3765313.665	387.3369755
311	4	47	4/10/2009	10:53:00	34.0287	-117.219183	479765.7163	3765359.843	411.3683587
312	4	48	4/14/2009	12:07:00	34.028917	-117.219117	479771.8607	3765383.89	429.7405958
313	4	49	4/17/2009	11:09:00	34.0296	-117.2189	479792.0554	3765459.578	461.5647808
314	4	50	4/21/2009	8:11:00	34.028517	-117.2192	479764.1035	3765339.555	394.5796109
315	4	51	4/28/2009	15:33:00	34.028	-117.2193	479754.749	3765282.251	352.0647772
316	4	52	5/1/2009	11:32:00	34.02925	-117.21945	479741.1984	3765420.879	476.6997641
317	4	53	5/5/2009	16:51:00	34.029333	-117.218933	479788.9457	3765429.98	464.5812524
318	4	54	5/12/2009	11:18:00	34.027767	-117.21895	479787.005	3765256.347	312.1743391
319	4	55	5/21/2009	14:36:00	34.0283	-117.219433	479742.542	3765315.54	386.1692131
320	4	56	5/31/2009	11:48:00	34.0283	-117.219433	479742.542	3765315.54	386.1692131
321	4	57	6/5/2009	11:21:00	34.0283	-117.219433	479742.542	3765315.54	386.1692131
322	4	58	6/10/2009	11:26:00	34.027883	-117.219317	479753.1518	3765269.281	342.7527316
323	4	59	6/18/2009	11:51:00	34.028067	-117.219117	479771.659	3765289.643	348.3234784
324	4	60	6/23/2009	10:16:00	34.028667	-117.219283	479756.4768	3765356.203	412.7927193
325	4	61	7/7/2009	9:59:00	34.028733	-117.2197	479717.9963	3765363.604	439.6509935
326	4	62	7/13/2009	6:52:00	34.028733	-117.2197	479717.9963	3765363.604	439.6509935
327	4	63	7/20/2009	21:05:00	34.028083	-117.21915	479768.6163	3765291.424	351.5001509
328	4	64	7/27/2009	7:19:00	34.027967	-117.2191	479773.2047	3765278.552	338.2847066
329	4	Release	7/28/2009	19:15:00	34.027967	-117.2191	479773.2047	3765278.552	338.2847066
330	4	65	8/3/2009	21:05:00	34.028033	-117.219167	479767.0351	3765285.883	347.8245285
331	4	66	8/10/2009	21:04:00	34.028033	-117.219167	479767.0351	3765285.883	347.8245285
332	4	67	8/17/2009	20:29:00	34.0285	-117.219117	479771.7618	3765337.654	389.0755399
333	4	68	8/23/2009	19:54:00	34.02965	-117.219	479782.8356	3765465.141	463.3221407
334	4	Last	8/28/2009	8:23:00	34.029517	-117.218933	479788.9893	3765450.381	470.6041726
335	5	Capture	8/15/2008	11:00:00	34.042467	-117.259183	476076.8985	3766894.941	14.68545489
336	5	Release	8/26/2008	19:49:00	34.040283	-117.258967	476096.2231	3766652.731	110.492667
337	5	1	8/27/2008	9:01:00	34.04	-117.25975	476023.869	3766621.535	151.3652108
338	5	2	8/29/2008	8:35:00	34.04	-117.25975	476023.869	3766621.535	151.3652108
339	5	3	9/2/2008	9:54:00	34.040983	-117.259483	476048.7907	3766730.467	45.41296522
340	5	4	9/4/2008	7:07:00	34.040983	-117.259483	476048.7907	3766730.467	45.41296522
341	5	5	9/8/2008	8:12:00	34.040983	-117.259483	476048.7907	3766730.467	45.41296522
342	5	6	9/10/2008	7:53:00	34.040983	-117.259483	476048.7907	3766730.467	45.41296522
343	5	7	9/17/2008	7:42:00	34.040983	-117.259483	476048.7907	3766730.467	45.41296522
344	5	8	9/19/2008	9:46:00	34.040983	-117.259483	476048.7907	3766730.467	45.41296522
345	5	9	9/23/2008	17:52:00	34.040983	-117.259483	476048.7907	3766730.467	45.41296522
346	5	10	9/25/2008	16:46:00	34.040983	-117.259483	476048.7907	3766730.467	45.41296522
347	5	11	9/30/2008	20:07:00	34.041089	-117.259933	476007.2838	3766742.326	72.72107792
348	5	12	10/2/2008	8:37:00	34.042	-117.259767	476022.8626	3766843.298	49.94137122
349	5	13	10/7/2008	9:04:00	34.04205	-117.25965	476033.6761	3766848.814	37.93238149
350	5	14	10/9/2008	7:45:00	34.04205	-117.25965	476033.6761	3766848.814	37.93238149
351	5	15	10/14/2008	16:57:00	34.04205	-117.25965	476033.6761	3766848.814	37.93238149
352	5	16	10/16/2008	8:38:00	34.04205	-117.25965	476033.6761	3766848.814	37.93238149
353	5	17	10/21/2008	18:14:00	34.042217	-117.259867	476013.6934	3766867.382	50.57314557
354	5	18	10/23/2008	17:04:00	34.042217	-117.259867	476013.6934	3766867.382	50.57314557
355	5	19	10/29/2008	14:24:00	34.042217	-117.259867	476013.6934	3766867.382	50.57314557
356	5	20	11/7/2008	14:49:00	34.041767	-117.26025	475978.2147	3766817.576	59.00615634
357	5	21	11/14/2008	16:56:00	34.041767	-117.26025	475978.2147	3766817.576	59.00615634
358	5	22	11/21/2008	14:23:00	34.041767	-117.26025	475978.2147	3766817.576	59.00615634
359	5	23	12/7/2008	13:44:00	34.041767	-117.26025	475978.2147	3766817.576	59.00615634
360	5	24	12/19/2008	13:53:00	34.041767	-117.26025	475978.2147	3766817.576	59.00615634
361	5	25	1/1/2009	14:29:00	34.04225	-117.259967	476004.4725	3766871.064	52.83155997
362	5	26	1/9/2009	10:12:00	34.04225	-117.259967	476004.4725	3766871.064	52.83155997
363	5	27	1/16/2009	13:26:00	34.04225	-117.259967	476004.4725	3766871.064	52.83155997
364	5	28	1/26/2009	14:21:00	34.04225	-117.259967	476004.4725	3766871.064	52.83155997
365	5	29	2/1/2009	15:00:00	34.04225	-117.259967	476004.4725	3766871.064	52.83155997
366	5	30	2/10/2009	8:40:00	34.04225	-117.259967	476004.4725	3766871.064	52.83155997
367	5	31	2/15/2009	11:35:00	34.04225	-117.259967	476004.4725	3766871.064	52.83155997
368	5	32	2/20/2009	11:00:00	34.04225	-117.259967	476004.4725	3766871.064	52.83155997
369	5	33	2/27/2009	10:59:00	34.042183	-117.2598	476019.8681	3766863.596	44.92806759
370	5	34	3/6/2009	11:55:00	34.042183	-117.2598	476019.8681	3766863.596	44.92806759
371	5	35	3/13/2009	14:04:00	34.042	-117.259633	476035.2312	3766843.266	40.35836449
372	5	36	3/19/2009	11:28:00	34.041367	-117.259867	476013.4541	3766773.134	68.69046311
373	5	37	3/27/2009	12:20:00	34.041133	-117.26005	475996.4967	3766747.232	61.39781034
374	5	38	3/31/2009	12:36:00	34.041133	-117.26005	475996.4967	3766747.232	61.39781034
375	5	39	4/5/2009	15:57:00	34.041133	-117.26005	475996.4967	3766747.232	61.39781034
376	5	40	4/6/2009	15:06:00	34.041133	-117.26005	475996.4967	3766747.232	61.39781034
377	5	41	4/9/2009	13:26:00	34.040217	-117.259767	476022.3609	3766645.6	130.6426551
378	5	42	4/12/2009	11:16:00	34.040217	-117.259767	476022.3609	3766645.6	130.6426551
379	5	43	4/16/2009	13:44:00	34.040217	-117.259767	476022.3609	3766645.6	130.6426551
380	5	44	4/19/2009	9:02:00	34.040533	-117.26005	475996.3277	3766680.704	88.82160997
381	5	45	4/24/2009	9:34:00	34.039617	-117.259883	476011.4846	3766579.1	181.0057536
382	5	46	4/29/2009	11:28:00	34.040933	-117.261217	475888.7217	3766725.33	36.91183783
383	5	47	5/3/2009	16:18:00	34.040583	-117.2609	475917.8831	3766686.448	56.7527948
384	5	48	5/10/2009	10:44:00	34.039317	-117.2591	476083.6755	3766545.653	216.5675298
385	5	49	5/17/2009	18:41:00	34.037467	-117.258167	476169.2792	3766340.309	370.3690903
386	5	50	5/22/2009	11:09:00	34.038317	-117.25795	476189.5475	3766434.505	285.8981855
387	5	51	6/2/2009	7:58:00	34.03835	-117.257983	476186.5106	3766438.172	285.512344
388	5	52	6/9/2009	9:13:00	34.038717	-117.259083	476085.0763	3766479.121	283.1117583
389	5	53	6/15/2009	11:08:00	34.038617	-117.259117	476081.9098	3766468.041	294.166865
390	5	54	6/22/2009	19:20:00	34.03855	-117.259383	476057.3375	3766460.675	302.4804278
391	5	55	7/6/2009	8:46:00	34.0387	-117.260167	475985.0115	3766477.49	269.379883
392	5	56	7/12/2009	20:30:00	34.038967	-117.260517	475952.7796	3766507.177	235.2989647
393	5	57	7/16/2009	8:57:00	34.0389	-117.26045	475958.9452	3766499.732	243.3303925
394	5	58	7/23/2009	21:01:00	34.0389	-117.260567	475948.1454	3766499.76	242.3261513
395	5	59	7/31/2009	8:44:00	34.038683	-117.26015	475986.5759	3766475.601	271.5440682
396	5	60	8/6/2009	20:32:00	34.040867	-117.26015	475987.1914	3766717.761	60.46288637
397	5	61	8/16/2009	19:10:00	34.04115	-117.260183	475984.2251	3766749.148	49.00079178
398	5	62	8/19/2009	9:23:00	34.04115	-117.260183	475984.2251	3766749.148	49.00079178
399	5	63	8/25/2009	7:03:00	34.04115	-117.260183	475984.2251	3766749.148	49.00079178
400	5	64	9/3/2009	7:28:00	34.04125	-117.260067	475994.9605	3766760.208	57.44600461
401	5	65	9/10/2009	7:04:00	34.04125	-117.260067	475994.9605	3766760.208	57.44600461
402	5	66	9/15/2009	18:22:00	34.041167	-117.2601	475991.8911	3766751.013	56.53351679
403	5	67	9/23/2009	7:31:00	34.041167	-117.2601	475991.8911	3766751.013	56.53351679
404	5	68	10/1/2009	8:30:00	34.04125	-117.260067	475994.9605	3766760.208	57.44600461
405	5	69	10/6/2009	18:06:00	34.04117	-117.260098	475992.0765	3766751.345	56.70590247
406	5	70	10/9/2009	9:16:00	34.04117	-117.260098	475992.0765	3766751.345	56.70590247
407	5	71	10/14/2009	10:04:00	34.04117	-117.260098	475992.0765	3766751.345	56.70590247
408	5	72	10/20/2009	11:22:00	34.04117	-117.260098	475992.0765	3766751.345	56.70590247
409	5	73	10/27/2009	12:45:00	34.04117	-117.260098	475992.0765	3766751.345	56.70590247
410	5	74	11/3/2009	0:03:00	34.041017	-117.259833	476016.4939	3766734.319	70.52433227
411	5	75	11/5/2009	8:41:00	34.041017	-117.259833	476016.4939	3766734.319	70.52433227
412	5	76	11/10/2009	8:38:00	34.041067	-117.259567	476041.0608	3766739.8	46.03100857
413	5	77	11/12/2009	11:34:00	34.041067	-117.259567	476041.0608	3766739.8	46.03100857
414	5	78	11/17/2009	13:27:00	34.041	-117.259483	476048.7955	3766732.352	44.11256534
415	5	79	11/20/2009	11:23:00	34.041	-117.259483	476048.7955	3766732.352	44.11256534
416	5	80	11/24/2009	13:02:00	34.041	-117.259483	476048.7955	3766732.352	44.11256534
417	5	81	12/4/2009	11:33:00	34.041	-117.259483	476048.7955	3766732.352	44.11256534
418	5	82	12/9/2009	12:48:00	34.041	-117.259483	476048.7955	3766732.352	44.11256534
419	5	83	12/16/2009	12:38:00	34.041	-117.259483	476048.7955	3766732.352	44.11256534
420	5	84	12/24/2009	12:45:00	34.041	-117.259483	476048.7955	3766732.352	44.11256534
421	5	85	12/31/2009	12:10:00	34.041	-117.259483	476048.7955	3766732.352	44.11256534
422	5	86	1/5/2010	13:20:00	34.041	-117.259483	476048.7955	3766732.352	44.11256534
423	5	87	1/12/2010	12:55:00	34.041	-117.259483	476048.7955	3766732.352	44.11256534
424	5	88	1/19/2010	12:01:00	34.041	-117.259483	476048.7955	3766732.352	44.11256534
425	5	89	1/26/2010	13:54:00	34.041	-117.259483	476048.7955	3766732.352	44.11256534
426	5	90	2/2/2010	11:21:00	34.041	-117.259483	476048.7955	3766732.352	44.11256534
427	5	91	2/11/2010	12:23:00	34.041	-117.259483	476048.7955	3766732.352	44.11256534
428	5	92	2/16/2010	11:39:00	34.04095	-117.25935	476061.0578	3766726.777	40.79002655
429	6	Capture	8/19/2008	19:36:00	34.043555	-117.268776	475191.7601	3767017.862	5.24754818
430	6	Release	8/26/2008	20:15:00	34.043317	-117.269917	475086.375	3766991.75	96.35683298
431	6	1	8/27/2008	9:52:00	34.043233	-117.269433	475131.0244	3766982.318	54.96914954
432	6	2	8/29/2008	7:56:00	34.043833	-117.2694	475134.2454	3767048.838	30.83611526
433	6	3	9/2/2008	8:21:00	34.043833	-117.269417	475132.6763	3767048.842	32.39592851
434	6	4	9/4/2008	7:38:00	34.043833	-117.269417	475132.6763	3767048.842	32.39592851
435	6	5	9/8/2008	7:08:00	34.043833	-117.269417	475132.6763	3767048.842	32.39592851
436	6	6	9/10/2008	7:28:00	34.043833	-117.269417	475132.6763	3767048.842	32.39592851
437	6	7	9/15/2008	11:30:00	34.043582	-117.268783	475191.1219	3767020.857	5.17953572
438	6	Relocate	9/15/2008	21:33:00	34.04345	-117.270083	475071.0919	3767006.537	104.3275662
439	6	8	9/16/2008	8:27:00	34.043483	-117.270333	475048.0263	3767010.257	124.1684828
440	6	9	9/19/2008	9:26:00	34.043483	-117.270333	475048.0263	3767010.257	124.1684828
441	6	10	9/23/2008	17:31:00	34.044633	-117.27035	475046.794	3767137.772	97.30901352
442	6	11	9/25/2008	16:24:00	34.0446	-117.270683	475016.0485	3767134.195	127.4537678
443	6	12	10/1/2008	7:53:00	34.045667	-117.272883	474813.3041	3767253.042	97.77910136
444	6	13	10/2/2008	9:01:00	34.04555	-117.2728	474820.9303	3767240.049	109.6373498
445	6	14	10/7/2008	10:48:00	34.04565	-117.2744	474673.2818	3767251.532	173.2624941
446	6	15	10/9/2008	8:40:00	34.045667	-117.2742	474691.7466	3767253.367	157.9897891
447	6	16	10/14/2008	17:22:00	34.045567	-117.273667	474740.9122	3767242.147	135.5179609
448	6	17	10/16/2008	9:05:00	34.045517	-117.274033	474707.1159	3767236.694	159.4045857
449	6	18	10/21/2008	17:10:00	34.04575	-117.274483	474665.6507	3767262.64	172.8436263
450	6	19	10/24/2008	17:26:00	34.04575	-117.274483	474665.6507	3767262.64	172.8436263
451	6	20	10/29/2008	15:27:00	34.04605	-117.2739	474719.5499	3767295.76	109.6743276
452	6	21	11/7/2008	14:27:00	34.045983	-117.2729	474811.8284	3767288.084	64.03650603
453	6	22	11/17/2008	7:03:00	34.045983	-117.2729	474811.8284	3767288.084	64.03650603
454	6	23	11/21/2008	13:20:00	34.045983	-117.2729	474811.8284	3767288.084	64.03650603
455	6	24	12/5/2008	13:43:00	34.045983	-117.2729	474811.8284	3767288.084	64.03650603
456	6	25	12/18/2008	14:47:00	34.045983	-117.2729	474811.8284	3767288.084	64.03650603
457	6	26	1/2/2009	13:10:00	34.045983	-117.2729	474811.8284	3767288.084	64.03650603
458	6	27	1/8/2009	13:43:00	34.045983	-117.2729	474811.8284	3767288.084	64.03650603
459	6	28	1/15/2009	13:47:00	34.045933	-117.272917	474810.2446	3767282.544	69.79709572
460	6	29	1/16/2009	14:59:00	34.045433	-117.27365	474742.4415	3767227.285	147.8692582
461	6	30	1/22/2009	14:12:00	34.04535	-117.27395	474714.7272	3767218.156	169.7388905
462	6	31	1/29/2009	14:46:00	34.04535	-117.27395	474714.7272	3767218.156	169.7388905
463	6	32	2/6/2009	10:20:00	34.045533	-117.274283	474684.046	3767238.53	173.7534923
464	6	33	2/15/2009	10:48:00	34.045533	-117.274283	474684.046	3767238.53	173.7534923
465	6	34	2/20/2009	10:06:00	34.045483	-117.274383	474674.8012	3767233.01	184.2515214
466	6	35	2/27/2009	9:47:00	34.04535	-117.27385	474723.9571	3767218.132	164.8187243
467	6	36	3/6/2009	10:43:00	34.045433	-117.273617	474745.4874	3767227.277	146.533191
468	6	37	3/13/2009	11:47:00	34.045417	-117.273683	474739.3909	3767225.519	150.8299944
469	6	38	3/19/2009	9:04:00	34.045317	-117.273917	474717.7633	3767214.489	171.1666834
470	6	39	3/27/2009	10:26:00	34.045367	-117.273967	474713.1632	3767220.046	169.0501811
471	6	40	3/31/2009	10:09:00	34.045383	-117.2739	474719.3519	3767221.803	164.1492393
472	6	41	4/5/2009	14:27:00	34.045383	-117.274017	474708.553	3767221.832	170.2563632
473	6	42	4/9/2009	11:38:00	34.045183	-117.272683	474831.6208	3767199.327	149.9144947
474	6	43	4/12/2009	10:03:00	34.045283	-117.272683	474831.6504	3767210.415	138.8268391
475	6	44	4/16/2009	11:24:00	34.045433	-117.272467	474851.6313	3767226.994	124.0041163
476	6	45	4/19/2009	11:01:00	34.044817	-117.27205	474889.9384	3767158.59	199.604897
477	6	46	4/22/2009	17:40:00	34.0443	-117.270883	474997.5004	3767100.98	144.9723832
478	6	47	4/29/2009	9:42:00	34.046317	-117.273367	474768.824	3767325.233	52.64102379
479	6	48	5/3/2009	18:22:00	34.044917	-117.271333	474956.1467	3767169.502	170.6477801
480	6	49	5/7/2009	19:33:00	34.044233	-117.27025	475055.9069	3767093.396	86.85942225
481	6	50	5/19/2009	10:18:00	34.043417	-117.27035	475046.4379	3767002.943	128.2909555
482	6	51	5/24/2009	10:23:00	34.043267	-117.27015	475064.8542	3766986.263	118.3969937
483	6	52	6/1/2009	15:57:00	34.044283	-117.269467	475128.1926	3767098.75	15.93866467
484	6	53	6/8/2009	9:12:00	34.045767	-117.269333	475140.9939	3767263.262	8.952994121
485	6	54	6/14/2009	10:31:00	34.044067	-117.26945	475129.6987	3767074.796	21.82379028
486	6	55	6/21/2009	17:29:00	34.043883	-117.269367	475137.3059	3767054.374	27.67835402
487	6	56	7/2/2009	19:55:00	34.0438	-117.26935	475138.8508	3767045.167	26.97882533
488	6	57	7/8/2009	7:48:00	34.043383	-117.268933	475177.2188	3766998.829	6.175865845
489	6	Release	7/8/2009	19:30:00	34.043362	-117.269739	475102.8178	3766996.696	79.52124183
490	6	58	7/15/2009	20:08:00	34.043233	-117.269617	475114.0409	3766982.363	71.01978696
491	6	59	7/22/2009	7:44:00	34.044133	-117.269433	475131.2871	3767082.11	15.33114441
492	6	60	7/28/2009	20:17:00	34.045233	-117.269283	475145.453	3767204.04	8.522032707
493	6	Relocate	7/28/2009	20:26:00	34.044783	-117.2703	475051.4529	3767154.392	93.50234843
494	6	61	8/5/2009	8:30:00	34.043502	-117.268835	475186.2989	3767012	3.667764164
495	6	Relocate	8/5/2009	10:15:00	34.0442	-117.270217	475058.9431	3767089.729	83.85487921
496	6	62	8/6/2009	7:58:00	34.0445	-117.2695	475125.2101	3767122.819	17.75915147
497	6	63	8/11/2009	20:07:00	34.0445	-117.2695	475125.2101	3767122.819	17.75915147
498	6	64	8/18/2009	8:20:00	34.0445	-117.2695	475125.2101	3767122.819	17.75915147
499	6	65	8/24/2009	19:04:00	34.043539	-117.269066	475164.9882	3767016.158	15.34163474
500	6	66	9/1/2009	7:39:00	34.044067	-117.269417	475132.7446	3767074.788	20.1562261
501	6	67	9/8/2009	19:43:00	34.045517	-117.26915	475157.8117	3767235.498	8.097520545
502	6	68	9/15/2009	8:48:00	34.045533	-117.2691	475162.4313	3767237.26	8.744332358
503	6	Relocate	9/15/2009	10:07:00	34.044417	-117.270217	475059.0067	3767113.79	83.37900558
504	6	69	9/23/2009	9:10:00	34.043617	-117.2689	475180.3329	3767024.766	3.989506868
505	6	70	9/30/2009	8:46:00	34.045143	-117.269339	475140.258	3767194.075	10.53218968
506	6	71	10/9/2009	20:29:00	34.045483	-117.269483	475127.0662	3767231.809	7.446444086
507	6	Relocate	10/9/2009	20:37:00	34.044783	-117.27035	475046.8379	3767154.404	98.11725379
508	6	72	10/14/2009	11:04:00	34.045583	-117.272033	474891.7333	3767243.519	122.0130106
509	6	73	10/20/2009	10:46:00	34.045317	-117.2734	474765.4819	3767214.362	149.8700172
510	6	74	10/21/2009	7:53:00	34.045317	-117.2734	474765.4819	3767214.362	149.8700172
511	6	75	10/27/2009	9:01:00	34.045633	-117.273633	474744.0699	3767249.457	127.613541
512	6	76	10/28/2009	8:56:00	34.045633	-117.273633	474744.0699	3767249.457	127.613541
513	6	77	11/3/2009	9:48:00	34.04565	-117.274333	474679.4658	3767251.515	168.4776462
514	6	78	11/5/2009	10:12:00	34.045598	-117.274267	474685.5421	3767245.733	167.7193745
515	6	79	11/10/2009	10:35:00	34.045598	-117.274267	474685.5421	3767245.733	167.7193745
516	6	80	11/12/2009	9:36:00	34.045598	-117.274267	474685.5421	3767245.733	167.7193745
517	6	81	11/17/2009	11:45:00	34.045598	-117.274267	474685.5421	3767245.733	167.7193745
518	6	82	11/20/2009	10:17:00	34.045598	-117.274267	474685.5421	3767245.733	167.7193745
519	6	83	11/24/2009	11:23:00	34.045598	-117.274267	474685.5421	3767245.733	167.7193745
520	6	84	12/4/2009	10:33:00	34.045598	-117.274267	474685.5421	3767245.733	167.7193745
521	6	85	12/9/2009	11:14:00	34.045598	-117.274267	474685.5421	3767245.733	167.7193745
522	6	86	12/16/2009	11:08:00	34.045598	-117.274267	474685.5421	3767245.733	167.7193745
523	6	87	12/22/2009	11:50:00	34.0455	-117.274317	474680.898	3767234.879	178.5552521
524	6	88	12/24/2009	12:21:00	34.0455	-117.274317	474680.898	3767234.879	178.5552521
525	6	89	12/29/2009	12:17:00	34.0455	-117.274317	474680.898	3767234.879	178.5552521
526	6	90	1/5/2010	11:33:00	34.0455	-117.274317	474680.898	3767234.879	178.5552521
527	6	91	1/12/2010	11:18:00	34.0455	-117.274317	474680.898	3767234.879	178.5552521
528	6	92	1/19/2010	11:25:00	34.0455	-117.274317	474680.898	3767234.879	178.5552521
529	6	93	1/26/2010	12:20:00	34.0455	-117.274317	474680.898	3767234.879	178.5552521
530	6	94	1/28/2010	10:36:00	34.0455	-117.274317	474680.898	3767234.879	178.5552521
531	6	95	2/2/2010	10:15:00	34.0455	-117.274317	474680.898	3767234.879	178.5552521
532	6	96	2/9/2010	10:59:00	34.0455	-117.274317	474680.898	3767234.879	178.5552521
533	6	97	2/11/2010	10:18:00	34.0455	-117.274317	474680.898	3767234.879	178.5552521
534	6	98	2/16/2010	10:23:00	34.0455	-117.274317	474680.898	3767234.879	178.5552521
535	6	99	2/23/2010	10:45:00	34.0455	-117.274317	474680.898	3767234.879	178.5552521
536	6	100	3/2/2010	11:14:00	34.0455	-117.274317	474680.898	3767234.879	178.5552521
537	6	101	3/4/2010	10:37:00	34.0455	-117.274317	474680.898	3767234.879	178.5552521
538	6	102	3/9/2010	11:15:00	34.0455	-117.274317	474680.898	3767234.879	178.5552521
539	6	103	3/12/2010	10:56:00	34.0455	-117.274317	474680.898	3767234.879	178.5552521
540	6	104	3/16/2010	11:03:00	34.045467	-117.274283	474684.0264	3767231.212	178.9346246
541	6	105	3/18/2010	11:40:00	34.0451	-117.27405	474705.4231	3767190.461	198.0902052
542	6	106	4/9/2010	10:03:00	34.044883	-117.272333	474863.8371	3767165.978	186.2117811
543	6	107	4/13/2010	10:53:00	34.045517	-117.27265	474834.7654	3767236.353	112.955269
544	6	108	4/15/2010	12:27:00	34.045383	-117.272117	474883.9212	3767221.364	138.4622747
545	6	109	4/20/2010	10:23:00	34.0458	-117.272083	474887.1823	3767267.592	99.21166345
546	6	110	4/22/2010	13:34:00	34.045517	-117.271933	474900.9437	3767236.177	133.0427494
547	6	111	4/27/2010	11:29:00	34.045683	-117.272967	474805.5557	3767254.837	97.72466713
548	6	112	4/29/2010	10:48:00	34.04585	-117.272183	474877.9672	3767273.161	89.50271918
549	6	113	5/4/2010	11:40:00	34.045317	-117.271533	474937.8045	3767213.903	161.3062314
550	6	114	5/6/2010	10:42:00	34.044983	-117.269467	475128.397	3767176.365	23.20450842
551	6	115	5/11/2010	10:38:00	34.045483	-117.269217	475151.6177	3767231.744	6.144809334
552	6	Relocate	5/11/2010	10:43:00	34.044733	-117.270333	475048.3924	3767148.856	96.74535383
553	6	116	5/13/2010	10:36:00	34.0447	-117.26955	475120.6535	3767145.007	26.20393359
554	6	117	5/18/2010	12:12:00	34.04475	-117.269483	475126.8522	3767150.534	18.60049453
555	6	118	5/20/2010	12:39:00	34.04475	-117.269483	475126.8522	3767150.534	18.60049453
556	6	119	5/25/2010	11:57:00	34.0449	-117.269483	475126.896	3767167.166	21.88037159
557	6	120	5/27/2010	16:06:00	34.0449	-117.269483	475126.896	3767167.166	21.88037159
558	6	121	6/1/2010	10:31:00	34.043933	-117.269433	475131.2287	3767059.934	34.34002634
559	6	122	6/3/2010	11:16:00	34.04405	-117.269433	475131.2628	3767072.907	22.52759823
560	6	123	6/10/2010	11:32:00	34.044697	-117.269335	475140.4971	3767144.622	7.502813808
561	6	124	6/17/2010	11:32:00	34.044842	-117.269385	475135.9244	3767160.711	10.78657804
562	6	125	6/23/2010	9:39:00	34.044885	-117.269368	475137.506	3767165.475	13.0076904
563	6	126	6/28/2010	11:10:00	34.045215	-117.269316	475142.4019	3767202.053	11.19133334
564	6	127	6/30/2010	9:23:00	34.0458	-117.269233	475150.2334	3767266.897	7.951836443
565	6	128	7/6/2010	19:12:00	34.046033	-117.26935	475139.5025	3767292.76	11.16925599
566	6	Relocate	7/6/2010	19:18:00	34.044767	-117.270333	475048.4024	3767152.626	96.57662855
567	6	129	7/7/2010	18:56:00	34.044076	-117.269344	475139.4852	3767075.768	16.83378445
568	6	130	7/8/2010	16:00:00	34.044076	-117.269344	475139.4852	3767075.768	16.83378445
569	6	131	7/15/2010	9:07:00	34.043767	-117.268883	475181.9457	3767041.394	4.989202773
570	6	132	4/12/2011	9:45:00	34.0458	-117.272567	474842.5098	3767267.711	82.36209741
571	6	Release	5/3/2011	8:26:00	34.045717	-117.2727	474830.2095	3767258.541	90.70041538
572	6	133	5/10/2011	16:27:00	34.044733	-117.27065	475019.1334	3767148.934	125.8847236
573	6	134	5/19/2011	10:30:00	34.043562	-117.269376	475136.3815	3767018.784	43.85146938
574	6	135	6/8/2011	11:06:00	34.044799	-117.269457	475129.2663	3767155.961	15.73010969
575	6	Relocate	6/8/2011	11:09:00	34.044567	-117.270217	475059.0506	3767130.422	84.31289805
576	6	136	6/15/2011	11:16:00	34.04489	-117.26938	475136.3999	3767166.032	14.10994885
577	6	137	6/22/2011	9:56:00	34.04489	-117.26938	475136.3999	3767166.032	14.10994885
578	6	138	6/28/2011	10:00:00	34.045367	-117.269233	475150.1071	3767218.886	9.704396983
579	6	Relocate	6/28/2011	10:07:00	34.044817	-117.2704	475042.2329	3767158.186	102.7768421
580	6	139	6/30/2011	9:21:00	34.044483	-117.270717	475012.876	3767121.23	129.7822996
581	6	140	7/7/2011	8:59:00	34.044134	-117.269091	475162.8541	3767082.137	5.87076979
582	6	Relocate	7/7/2011	9:04:00	34.044183	-117.270117	475068.1682	3767087.82	74.72419645
583	6	141	7/15/2011	9:38:00	34.0437	-117.269317	475141.8676	3767034.071	29.30651055
584	6	142	7/26/2011	19:30:00	34.04557	-117.26927	475146.7513	3767241.404	15.09909409
585	6	143	8/4/2011	18:29:00	34.045752	-117.269189	475154.2805	3767261.564	4.575045536
586	6	144	8/14/2011	10:37:00	34.045752	-117.269189	475154.2805	3767261.564	4.575045536
587	6	145	8/21/2011	8:38:00	34.045752	-117.269189	475154.2805	3767261.564	4.575045536
588	6	146	8/26/2011	7:09:00	34.045752	-117.269189	475154.2805	3767261.564	4.575045536
589	6	147	9/2/2011	7:21:00	34.045455	-117.269294	475144.5025	3767228.658	11.10882098
590	6	148	9/12/2011	8:05:00	34.045699	-117.269231	475150.3885	3767255.697	11.25829081
591	6	149	9/20/2011	8:43:00	34.045851	-117.269675	475109.4523	3767272.659	8.126973665
592	6	150	10/3/2011	8:33:00	34.045364	-117.272676	474832.3204	3767219.395	129.8530219
593	6	151	10/12/2011	9:04:00	34.045067	-117.269267	475146.8814	3767185.631	5.758777018
594	6	Final_Release	10/17/2011	8:14:00	34.044904	-117.271023	474984.7558	3767167.985	150.0078524
595	7	Capture	8/26/2008	20:56:00	34.019033	-117.224217	479298.6454	3764288.984	3.502070664
596	7	Release	8/29/2008	19:49:00	34.021717	-117.224933	479233.1926	3764586.727	236.2547409
597	7	1	9/1/2008	19:14:00	34.021633	-117.224983	479228.5559	3764577.424	227.4326577
598	7	2	9/3/2008	8:46:00	34.021633	-117.224983	479228.5559	3764577.424	227.4326577
599	7	3	9/5/2008	9:02:00	34.021133	-117.22505	479222.2483	3764521.998	173.4232991
600	7	4	9/9/2008	9:42:00	34.020733	-117.2252	479208.302	3764477.677	133.9948426
601	7	5	9/11/2008	7:36:00	34.020717	-117.225183	479209.8676	3764475.899	131.8007906
602	7	6	9/17/2008	9:38:00	34.019567	-117.225117	479215.6808	3764348.375	37.23607001
603	7	7	9/22/2008	7:21:00	34.019683	-117.225033	479223.4645	3764361.22	30.9740072
604	7	8	9/24/2008	18:24:00	34.019617	-117.224817	479243.391	3764353.858	9.756489016
605	7	9	9/29/2008	8:09:00	34.019383	-117.224467	479275.6486	3764327.842	18.30154853
606	7	10	10/1/2008	8:44:00	34.019383	-117.224467	479275.6486	3764327.842	18.30154853
607	7	11	10/5/2008	16:41:00	34.019433	-117.224517	479271.0444	3764333.396	17.19241456
608	7	12	10/8/2008	7:46:00	34.0195	-117.224467	479275.677	3764340.815	9.584166711
609	7	13	10/13/2008	8:04:00	34.0195	-117.224467	479275.677	3764340.815	9.584166711
610	7	14	10/15/2008	7:34:00	34.0195	-117.224467	479275.677	3764340.815	9.584166711
611	7	15	10/20/2008	17:26:00	34.02015	-117.2241	479309.7187	3764412.812	69.80779059
612	7	16	10/22/2008	17:57:00	34.02035	-117.224083	479311.3368	3764434.984	91.68877808
613	7	17	10/31/2008	17:03:00	34.0202	-117.22405	479314.3472	3764418.345	76.45148975
614	7	18	11/6/2008	17:21:00	34.0202	-117.22405	479314.3472	3764418.345	76.45148975
615	7	19	11/13/2008	16:37:00	34.0202	-117.22405	479314.3472	3764418.345	76.45148975
616	7	20	11/20/2008	16:26:00	34.0202	-117.22405	479314.3472	3764418.345	76.45148975
617	7	21	12/10/2008	14:46:00	34.02005	-117.224133	479306.6477	3764401.73	58.30843267
618	7	22	12/21/2008	14:13:00	34.02005	-117.224133	479306.6477	3764401.73	58.30843267
619	7	23	1/5/2009	16:10:00	34.020267	-117.224083	479311.3167	3764425.781	82.74424159
620	7	24	1/12/2009	11:16:00	34.020267	-117.224083	479311.3167	3764425.781	82.74424159
621	7	25	1/19/2009	15:25:00	34.020267	-117.224083	479311.3167	3764425.781	82.74424159
622	7	26	1/27/2009	15:13:00	34.020233	-117.2241	479309.7389	3764422.015	78.7056688
623	7	27	2/3/2009	14:49:00	34.020233	-117.2241	479309.7389	3764422.015	78.7056688
624	7	28	2/10/2009	10:43:00	34.020233	-117.2241	479309.7389	3764422.015	78.7056688
625	7	29	2/17/2009	10:43:00	34.020233	-117.2241	479309.7389	3764422.015	78.7056688
626	7	30	2/22/2009	13:54:00	34.020233	-117.2241	479309.7389	3764422.015	78.7056688
627	7	31	3/1/2009	16:31:00	34.020233	-117.2241	479309.7389	3764422.015	78.7056688
628	7	32	3/8/2009	12:29:00	34.020233	-117.2241	479309.7389	3764422.015	78.7056688
629	7	33	3/15/2009	12:34:00	34.020233	-117.2241	479309.7389	3764422.015	78.7056688
630	7	34	3/23/2009	13:20:00	34.019917	-117.224383	479283.5338	3764387.034	41.98001672
631	7	35	3/29/2009	17:33:00	34.01995	-117.224467	479275.7864	3764390.71	45.63307307
632	7	36	4/2/2009	11:01:00	34.01995	-117.224467	479275.7864	3764390.71	45.63307307
633	7	37	4/7/2009	10:41:00	34.020083	-117.2249	479235.8414	3764405.545	56.84682533
634	7	38	4/10/2009	10:24:00	34.020361	-117.22493	479233.1393	3764436.375	87.33000636
635	7	39	4/14/2009	11:33:00	34.020467	-117.22495	479231.3186	3764448.132	99.19889797
636	7	40	4/17/2009	10:31:00	34.02015	-117.224683	479255.8925	3764412.93	61.71985236
637	7	41	4/21/2009	8:39:00	34.0202	-117.224717	479252.7656	3764418.48	67.19247829
638	7	42	4/28/2009	15:05:00	34.0195	-117.224433	479278.8161	3764340.808	6.657740355
639	7	43	5/1/2009	10:50:00	34.0195	-117.224433	479278.8161	3764340.808	6.657740355
640	7	44	5/5/2009	16:18:00	34.019483	-117.225317	479197.1949	3764339.102	56.92736169
641	7	45	5/12/2009	10:38:00	34.018567	-117.224883	479237.0418	3764237.449	67.42152882
642	7	46	5/21/2009	14:05:00	34.019717	-117.224933	479232.7055	3764364.97	24.31277351
643	7	47	5/31/2009	11:13:00	34.019333	-117.225017	479224.8565	3764322.409	40.18662314
644	7	48	6/5/2009	10:51:00	34.0195	-117.224467	479275.677	3764340.815	9.584166711
645	7	49	6/10/2009	11:02:00	34.0195	-117.224467	479275.677	3764340.815	9.584166711
646	7	50	6/10/2009	11:27:00	34.0195	-117.224467	479275.677	3764340.815	9.584166711
647	7	51	6/23/2009	9:52:00	34.0195	-117.224467	479275.677	3764340.815	9.584166711
648	7	52	7/7/2009	9:21:00	34.019883	-117.223983	479320.4562	3764383.183	47.92344872
649	7	53	7/13/2009	7:29:00	34.019883	-117.223983	479320.4562	3764383.183	47.92344872
650	7	54	7/20/2009	21:51:00	34.020267	-117.22405	479314.3634	3764425.774	83.55078218
651	7	55	7/27/2009	6:51:00	34.020267	-117.22405	479314.3634	3764425.774	83.55078218
652	7	56	8/3/2009	20:04:00	34.020267	-117.22405	479314.3634	3764425.774	83.55078218
653	7	57	8/10/2009	20:38:00	34.020267	-117.22405	479314.3634	3764425.774	83.55078218
654	7	58	8/17/2009	20:53:00	34.020267	-117.22405	479314.3634	3764425.774	83.55078218
655	7	59	8/23/2009	20:18:00	34.020267	-117.22405	479314.3634	3764425.774	83.55078218
656	7	60	8/28/2009	8:46:00	34.020267	-117.22405	479314.3634	3764425.774	83.55078218
657	7	61	9/3/2009	8:44:00	34.020267	-117.22405	479314.3634	3764425.774	83.55078218
658	7	62	9/10/2009	8:27:00	34.020267	-117.22405	479314.3634	3764425.774	83.55078218
659	7	63	9/15/2009	19:32:00	34.020267	-117.22405	479314.3634	3764425.774	83.55078218
660	10	Capture	9/9/2008	8:07:00	34.035517	-117.224133	479310.4019	3766116.693	10.15109552
661	10	Release	9/11/2008	20:05:00	34.033617	-117.223617	479357.5735	3765905.919	99.07065247
662	10	1	9/16/2008	9:33:00	34.033117	-117.223	479414.409	3765850.356	173.34764
663	10	2	9/22/2008	9:09:00	34.0331	-117.222983	479415.9742	3765848.467	175.6321142
664	10	3	12/8/2008	16:49:00	34.035333	-117.225367	479196.4468	3766096.542	0.354627086
665	11	Capture	9/20/2008	19:43:00	34.041379	-117.260584	475947.276	3766774.633	8.305046595
666	11	Release	10/7/2008	8:17:00	34.040133	-117.258217	476165.4096	3766635.924	140.272406
667	11	1	10/9/2008	8:03:00	34.040133	-117.258217	476165.4096	3766635.924	140.272406
668	11	2	10/14/2008	16:35:00	34.040133	-117.258217	476165.4096	3766635.924	140.272406
669	11	3	10/16/2008	8:21:00	34.040133	-117.258217	476165.4096	3766635.924	140.272406
670	11	4	10/23/2008	16:11:00	34.039867	-117.25865	476125.3671	3766606.531	161.8012106
671	11	5	10/29/2008	14:07:00	34.039867	-117.25865	476125.3671	3766606.531	161.8012106
672	11	6	11/7/2008	15:21:00	34.039283	-117.259483	476048.3128	3766541.972	222.6874508
673	11	7	11/14/2008	15:59:00	34.040367	-117.258683	476122.4611	3766661.978	108.36328
674	11	8	11/21/2008	14:44:00	34.0401	-117.2581	476176.2	3766632.238	142.6676184
675	11	9	12/7/2008	14:09:00	34.04015	-117.2582	476166.9835	3766637.805	138.1740517
676	11	10	12/19/2008	14:08:00	34.04015	-117.2582	476166.9835	3766637.805	138.1740517
677	11	11	1/1/2009	13:58:00	34.0399	-117.258633	476126.9455	3766610.186	158.7346696
678	11	12	1/9/2009	10:42:00	34.0399	-117.258633	476126.9455	3766610.186	158.7346696
679	11	13	1/16/2009	13:49:00	34.039733	-117.25865	476125.3295	3766591.673	176.1338987
680	11	Release	1/19/2009	15:00:00	34.039917	-117.258583	476131.5655	3766612.059	158.3480945
681	11	14	1/26/2009	14:50:00	34.03985	-117.258667	476123.7931	3766604.65	163.1946175
682	11	15	2/1/2009	15:31:00	34.039417	-117.258583	476131.4255	3766556.62	211.6167934
683	11	16	2/10/2009	9:35:00	34.039833	-117.258583	476131.542	3766602.746	167.197929
684	11	17	2/15/2009	11:55:00	34.039833	-117.258583	476131.542	3766602.746	167.197929
685	11	18	2/20/2009	11:18:00	34.039833	-117.258583	476131.542	3766602.746	167.197929
686	11	Release	3/6/2009	12:11:00	34.039833	-117.258583	476131.542	3766602.746	167.197929
687	11	19	3/13/2009	14:54:00	34.04015	-117.2582	476166.9835	3766637.805	138.1740517
688	11	20	3/19/2009	12:17:00	34.041167	-117.2609	475918.0482	3766751.201	8.272045531
689	11	21	3/31/2009	13:24:00	34.0404	-117.259717	476027.0276	3766665.879	110.5501892
690	11	22	4/5/2009	15:57:00	34.041017	-117.260767	475930.2822	3766734.538	7.103963044
691	11	23	4/6/2009	14:58:00	34.041017	-117.260633	475942.6509	3766734.507	13.09494098
692	11	24	4/9/2009	13:06:00	34.04095	-117.260783	475928.7864	3766727.113	14.67780728
693	11	25	4/12/2009	11:01:00	34.04095	-117.260783	475928.7864	3766727.113	14.67780728
694	11	26	4/16/2009	13:31:00	34.04095	-117.260783	475928.7864	3766727.113	14.67780728
695	11	27	4/19/2009	8:32:00	34.04095	-117.260783	475928.7864	3766727.113	14.67780728
696	11	28	4/24/2009	9:00:00	34.04105	-117.260617	475944.1371	3766738.162	12.98653441
697	11	29	4/29/2009	10:32:00	34.04105	-117.260617	475944.1371	3766738.162	12.98653441
698	11	Relocate	4/29/2009	10:45:00	34.041117	-117.260067	475994.923	3766745.462	60.03974725
699	11	30	5/3/2009	16:06:00	34.041117	-117.260033	475998.0614	3766745.454	63.15313091
700	11	31	5/10/2009	10:06:00	34.040733	-117.26035	475968.6928	3766702.95	53.51733064
701	11	32	5/22/2009	10:15:00	34.039933	-117.259617	476036.1267	3766614.075	154.8581574
702	11	33	6/2/2009	7:30:00	34.039782	-117.260377	475965.9323	3766597.511	148.0468374
703	11	34	6/9/2009	9:13:00	34.039782	-117.260377	475965.9323	3766597.511	148.0468374
704	11	35	6/15/2009	11:31:00	34.04	-117.26075	475931.5641	3766621.77	119.7501263
705	11	36	6/22/2009	18:51:00	34.039933	-117.259717	476026.8962	3766614.099	157.7736672
706	11	37	7/6/2009	8:10:00	34.041167	-117.261333	475878.0807	3766751.303	9.086054507
707	11	38	7/12/2009	20:10:00	34.041167	-117.261333	475878.0807	3766751.303	9.086054507
708	11	39	7/16/2009	8:38:00	34.041167	-117.261333	475878.0807	3766751.303	9.086054507
709	11	40	7/23/2009	20:09:00	34.04	-117.260383	475965.44	3766621.684	124.5245602
710	11	Release	7/28/2009	19:40:00	34.04	-117.260383	475965.44	3766621.684	124.5245602
711	11	41	7/31/2009	8:16:00	34.040083	-117.260233	475979.3091	3766630.851	120.5178489
712	11	42	8/6/2009	19:56:00	34.039983	-117.260767	475929.9901	3766619.889	121.6416746
713	11	43	8/16/2009	19:47:00	34.040083	-117.260183	475983.9244	3766630.84	122.4285213
714	11	44	8/19/2009	10:07:00	34.0401	-117.260283	475974.6987	3766632.748	117.0023084
715	11	45	8/25/2009	7:30:00	34.040217	-117.260983	475910.1184	3766645.885	98.01634193
716	11	46	9/3/2009	7:45:00	34.041183	-117.26125	475885.7465	3766753.058	13.51072313
717	11	47	9/10/2009	7:26:00	34.041083	-117.260867	475921.0705	3766741.88	1.562831241
718	11	Relocate	9/10/2009	7:26:00	34.040467	-117.260833	475924.0348	3766673.57	68.36910393
719	11	48	9/15/2009	18:37:00	34.040233	-117.260967	475911.5998	3766647.656	95.96964063
720	11	49	9/23/2009	8:04:00	34.041932	-117.26137	475874.8821	3766836.134	8.974952833
721	11	50	10/1/2009	8:47:00	34.041932	-117.26137	475874.8821	3766836.134	8.974952833
722	11	51	10/6/2009	18:25:00	34.041932	-117.26137	475874.8821	3766836.134	8.974952833
723	11	52	10/14/2009	10:30:00	34.041283	-117.260783	475928.8805	3766764.036	2.937663488
724	11.1	Capture	10/14/2009	10:30:00	34.041283	-117.260783	475928.8805	3766764.036	2.937663488
725	11.1	Release	10/20/2009	17:41:00	34.045383	-117.274283	474684.0014	3767221.898	185.7370592
726	11.1	53	10/21/2009	8:10:00	34.045383	-117.273983	474711.6911	3767221.824	168.4327843
727	11.1	54	10/27/2009	11:50:00	34.044567	-117.27605	474520.6648	3767131.859	45.21179537
728	11.1	55	10/28/2009	10:07:00	34.044567	-117.27605	474520.6648	3767131.859	45.21179537
729	11.1	56	11/3/2009	8:52:00	34.044567	-117.27605	474520.6648	3767131.859	45.21179537
730	11.1	57	11/5/2009	9:32:00	34.044567	-117.27605	474520.6648	3767131.859	45.21179537
731	11.1	58	11/10/2009	12:08:00	34.045217	-117.272117	474883.8723	3767202.958	155.6044317
732	11.1	59	11/12/2009	10:19:00	34.0434	-117.2711	474977.207	3767001.241	188.9330009
733	11.1	60	11/17/2009	13:02:00	34.0434	-117.2711	474977.207	3767001.241	188.9330009
734	11.1	61	11/20/2009	9:20:00	34.0434	-117.2711	474977.207	3767001.241	188.9330009
735	11.1	62	11/24/2009	12:15:00	34.0434	-117.2711	474977.207	3767001.241	188.9330009
736	11.1	63	12/4/2009	9:48:00	34.0434	-117.2711	474977.207	3767001.241	188.9330009
737	11.1	64	12/9/2009	12:30:00	34.0434	-117.2711	474977.207	3767001.241	188.9330009
738	11.1	65	12/16/2009	12:17:00	34.0434	-117.2711	474977.207	3767001.241	188.9330009
739	11.1	66	12/22/2009	12:46:00	34.0434	-117.2711	474977.207	3767001.241	188.9330009
740	11.1	67	12/29/2009	11:04:00	34.0434	-117.2711	474977.207	3767001.241	188.9330009
741	11.1	68	1/5/2010	13:00:00	34.0434	-117.2711	474977.207	3767001.241	188.9330009
742	11.1	69	1/12/2010	10:46:00	34.0434	-117.2711	474977.207	3767001.241	188.9330009
743	11.1	70	1/19/2010	11:00:00	34.0434	-117.2711	474977.207	3767001.241	188.9330009
744	11.1	71	1/26/2010	12:59:00	34.0434	-117.2711	474977.207	3767001.241	188.9330009
745	11.1	72	2/2/2010	11:00:00	34.0434	-117.2711	474977.207	3767001.241	188.9330009
746	11.1	73	2/11/2010	10:54:00	34.0434	-117.2711	474977.207	3767001.241	188.9330009
747	11.1	74	2/16/2010	11:02:00	34.043533	-117.271033	474983.4302	3767015.972	176.6597858
748	11.1	75	2/23/2010	10:21:00	34.04345	-117.271017	474984.8826	3767006.765	179.5491056
749	11.1	76	3/2/2010	10:52:00	34.043517	-117.271017	474984.9023	3767014.194	176.1143504
750	11.1	77	3/4/2010	11:14:00	34.043517	-117.271017	474984.9023	3767014.194	176.1143504
751	11.1	78	3/9/2010	10:37:00	34.043517	-117.271017	474984.9023	3767014.194	176.1143504
752	11.1	79	3/12/2010	10:10:00	34.043517	-117.271017	474984.9023	3767014.194	176.1143504
753	11.1	80	3/16/2010	11:49:00	34.043467	-117.270917	474994.1177	3767008.626	170.5647443
754	11.1	81	3/18/2010	11:05:00	34.042923	-117.270894	474996.081	3766948.302	193.7975021
755	11.1	82	3/24/2010	12:00:00	34.042966	-117.270668	475016.9538	3766953.014	172.4454763
756	11.1	83	3/31/2010	9:35:00	34.04302	-117.270277	475053.0596	3766958.906	136.2522368
757	11.1	84	4/7/2010	11:12:00	34.042	-117.2694	475133.7104	3766845.596	106.9599398
758	11.1	85	4/9/2010	10:58:00	34.04265	-117.269767	475100.0253	3766917.757	113.5904986
759	11.1	86	4/13/2010	11:57:00	34.042667	-117.2698	475096.9843	3766919.65	114.7172326
760	11.1	87	4/15/2010	11:00:00	34.042467	-117.269333	475140.031	3766897.36	89.71941481
761	11.1	88	4/20/2010	11:50:00	34.041833	-117.27005	475073.6648	3766827.237	169.6959966
762	11.1	89	4/22/2010	15:01:00	34.0416	-117.270217	475058.182	3766801.443	190.6021936
763	11.1	90	4/27/2010	12:44:00	34.042817	-117.27035	475046.2621	3766936.416	150.508054
764	11.1	91	4/29/2010	11:51:00	34.042833	-117.270333	475047.8359	3766938.186	148.3978965
765	11.1	92	5/4/2010	12:32:00	34.042967	-117.27095	474990.925	3766953.194	197.4723168
766	11.1	93	5/6/2010	11:28:00	34.042967	-117.27095	474990.925	3766953.194	197.4723168
767	11.1	94	5/11/2010	11:10:00	34.042967	-117.27095	474990.925	3766953.194	197.4723168
768	11.1	95	5/13/2010	10:03:00	34.042967	-117.27095	474990.925	3766953.194	197.4723168
769	11.1	96	5/18/2010	12:39:00	34.042967	-117.27095	474990.925	3766953.194	197.4723168
770	11.1	97	5/20/2010	12:56:00	34.042967	-117.27095	474990.925	3766953.194	197.4723168
771	11.1	98	5/25/2010	12:23:00	34.042967	-117.27095	474990.925	3766953.194	197.4723168
772	11.1	99	5/27/2010	16:34:00	34.042967	-117.27095	474990.925	3766953.194	197.4723168
773	11.1	100	6/1/2010	10:59:00	34.04305	-117.270867	474998.6104	3766962.377	187.8636462
774	11.1	101	6/3/2010	10:52:00	34.04305	-117.270867	474998.6104	3766962.377	187.8636462
775	11.1	102	6/10/2010	12:20:00	34.043352	-117.270078	475071.5248	3766995.67	109.1495346
776	11.1	103	6/17/2010	12:05:00	34.042833	-117.27035	475046.2668	3766938.19	149.8610258
777	11.1	104	6/23/2010	8:54:00	34.042767	-117.271	474986.2512	3766931.03	208.5307228
778	11.1	105	6/28/2010	11:31:00	34.045467	-117.271817	474911.6357	3767230.604	143.5460202
779	11.1	106	6/30/2010	11:38:00	34.04265	-117.274167	474693.8963	3766918.836	165.7950804
780	11.1	107	7/6/2010	17:43:00	34.043017	-117.272167	474878.6086	3766959.036	295.8539707
781	11.1	108	7/8/2010	17:22:00	34.042783	-117.271233	474964.7496	3766932.861	228.2798909
782	11.1	109	7/15/2010	10:10:00	34.04305	-117.2702	475060.1756	3766962.214	128.4541568
783	11.1	110	7/20/2010	7:04:00	34.0429	-117.270267	475053.9475	3766945.598	140.1035139
784	11.1	111	7/22/2010	10:23:00	34.042867	-117.270267	475053.9378	3766941.939	141.3590736
785	11.1	112	3/10/2011	10:52:00	34.042583	-117.270233	475056.9929	3766910.441	152.6784538
786	11.1	Release	3/17/2011	8:32:00	34.042583	-117.270233	475056.9929	3766910.441	152.6784538
787	11.1	113	3/22/2011	11:08:00	34.043567	-117.270967	474989.532	3767019.726	169.5367054
788	11.1	114	3/24/2011	10:33:00	34.043567	-117.270967	474989.532	3767019.726	169.5367054
789	11.1	115	3/29/2011	10:30:00	34.04345	-117.2709	474995.6819	3767006.736	170.1456856
790	11.1	116	3/31/2011	9:50:00	34.043433	-117.270933	474992.6309	3767004.86	173.7262504
791	11.1	117	4/5/2011	10:10:00	34.04345	-117.270433	475038.7865	3767006.622	134.093371
792	11.1	118	4/12/2011	10:39:00	34.043433	-117.270817	475003.3379	3767004.831	164.5772605
793	11.1	119	4/14/2011	9:22:00	34.043117	-117.269967	475081.7015	3766969.586	105.7023495
794	11.1	120	4/19/2011	11:02:00	34.042817	-117.27125	474963.1904	3766936.635	228.6480919
795	11.1	121	4/21/2011	9:36:00	34.04345	-117.271167	474971.0375	3767006.802	191.8199019
796	11.1	122	4/26/2011	10:35:00	34.042917	-117.2697	475106.2875	3766947.345	91.44092205
797	11.1	123	4/28/2011	11:07:00	34.042817	-117.2699	475087.798	3766936.306	112.9663544
798	11.1	124	5/3/2011	8:45:00	34.042917	-117.2702	475060.1367	3766947.467	133.6442774
799	11.1	125	5/10/2011	17:16:00	34.043217	-117.270017	475077.1156	3766980.686	107.2644216
800	11.1	126	5/19/2011	17:49:00	34.043283	-117.270133	475066.428	3766988.033	116.6043198
801	11.1	127	6/8/2011	10:07:00	34.042867	-117.270583	475024.7704	3766942.016	168.6054342
802	11.1	128	6/15/2011	10:36:00	34.042917	-117.2705	475032.4461	3766947.54	159.4757102
803	11.1	129	6/22/2011	11:21:00	34.043338	-117.271158	474971.8353	3766994.381	196.9752432
804	11.1	130	6/30/2011	8:45:00	34.042983	-117.270733	475010.9592	3766954.915	177.6759341
805	11.1	131	7/7/2011	10:08:00	34.042611	-117.270811	475003.6505	3766913.687	198.5657853
806	11.1	132	7/15/2011	9:24:00	34.042683	-117.269767	475100.0349	3766921.416	111.2355867
807	11.1	133	7/26/2011	18:53:00	34.042743	-117.271225	474965.4762	3766928.424	228.9864137
808	11.1	134	8/4/2011	19:24:00	34.042859	-117.270496	475032.7984	3766941.108	161.4826466
809	11.1	135	8/14/2011	9:29:00	34.043083	-117.270183	475061.7544	3766965.869	125.8417684
810	11.1	136	8/21/2011	9:43:00	34.043312	-117.27016	475063.9444	3766991.255	117.9207496
811	11.1	137	8/26/2011	8:32:00	34.042899	-117.270639	475019.6109	3766945.578	172.2187521
812	11.1	138	9/2/2011	8:12:00	34.042899	-117.270639	475019.6109	3766945.578	172.2187521
813	11.1	139	9/12/2011	9:17:00	34.042782	-117.270678	475015.9768	3766932.615	180.2319156
814	11.1	140	9/20/2011	10:38:00	34.042633	-117.271583	474932.3998	3766916.315	264.2028374
815	11.1	141	9/27/2011	9:25:00	34.042935	-117.27095	474990.9156	3766949.646	198.3985455
816	11.1	142	10/18/2011	9:54:00	34.043267	-117.2769	474441.8199	3766987.928	172.1443967
817	11.1	Final_Release	10/19/2011	15:20:00	34.04346	-117.270186	475061.5878	3767007.671	112.496199
818	12	Capture	10/1/2008	21:55:00	34.042297	-117.267972	475265.605	3766878.181	2.442557521
819	12	Release	10/7/2008	9:49:00	34.042217	-117.270267	475053.7475	3766869.868	178.2981212
820	12	1	10/9/2008	9:12:00	34.0425	-117.270117	475067.6757	3766901.21	149.1604702
821	12	2	10/14/2008	5:57:00	34.042417	-117.269917	475086.1119	3766891.958	139.6242681
822	12	3	10/16/2008	9:27:00	34.042417	-117.269917	475086.1119	3766891.958	139.6242681
823	12	4	10/21/2008	17:10:00	34.0421	-117.269	475170.6607	3766856.587	68.51658382
824	12	5	10/24/2008	16:43:00	34.0421	-117.269	475170.6607	3766856.587	68.51658382
825	12	6	10/29/2008	14:41:00	34.041983	-117.269	475170.6266	3766843.614	71.38300816
826	12	7	11/7/2008	13:01:00	34.042117	-117.2683	475235.2775	3766858.302	6.644735631
827	12	8	11/17/2008	20:35:00	34.0409	-117.267967	475265.6609	3766723.282	32.09706344
828	12	9	11/21/2008	14:00:00	34.0409	-117.267967	475265.6609	3766723.282	32.09706344
829	12	10	12/5/2008	15:09:00	34.041433	-117.267783	475282.7995	3766782.336	18.99729972
830	12	11	12/18/2008	15:09:00	34.041433	-117.267783	475282.7995	3766782.336	18.99729972
831	12	12	1/2/2009	13:30:00	34.041533	-117.26795	475267.4139	3766793.464	2.614211684
832	12	13	1/8/2009	14:32:00	34.041533	-117.26795	475267.4139	3766793.464	2.614211684
833	12	14	1/15/2009	14:53:00	34.041533	-117.26795	475267.4139	3766793.464	2.614211684
834	12	15	1/22/2009	14:47:00	34.041533	-117.26795	475267.4139	3766793.464	2.614211684
835	12	16	1/29/2009	15:20:00	34.041533	-117.26795	475267.4139	3766793.464	2.614211684
836	12	17	2/6/2009	10:56:00	34.041533	-117.26795	475267.4139	3766793.464	2.614211684
837	12	18	2/15/2009	11:19:00	34.041533	-117.26795	475267.4139	3766793.464	2.614211684
838	12	19	2/20/2009	10:48:00	34.041533	-117.26795	475267.4139	3766793.464	2.614211684
839	12	20	2/27/2009	10:41:00	34.041533	-117.26795	475267.4139	3766793.464	2.614211684
840	12	21	3/6/2009	11:36:00	34.041533	-117.26795	475267.4139	3766793.464	2.614211684
841	12	22	3/13/2009	13:43:00	34.041533	-117.26795	475267.4139	3766793.464	2.614211684
842	12	23	3/19/2009	10:47:00	34.041533	-117.26795	475267.4139	3766793.464	2.614211684
843	12	24	3/27/2009	10:57:00	34.041533	-117.26795	475267.4139	3766793.464	2.614211684
844	12	25	3/31/2009	12:25:00	34.041533	-117.26795	475267.4139	3766793.464	2.614211684
845	12	26	4/5/2009	15:41:00	34.041533	-117.26795	475267.4139	3766793.464	2.614211684
846	12	27	4/9/2009	12:47:00	34.041783	-117.267833	475278.2859	3766821.156	6.850820309
847	12	28	4/12/2009	10:43:00	34.041783	-117.267833	475278.2859	3766821.156	6.850820309
848	12	29	4/16/2009	13:10:00	34.041783	-117.267833	475278.2859	3766821.156	6.850820309
849	12	30	4/19/2009	9:57:00	34.041783	-117.267833	475278.2859	3766821.156	6.850820309
850	12	31	4/22/2009	18:28:00	34.042217	-117.267917	475270.6584	3766869.298	8.752500947
851	12	Relocate	4/22/2009	20:00:00	34.04555	-117.272583	474840.9592	3767239.995	109.7138318
852	12	32	4/29/2009	9:24:00	34.045683	-117.2726	474839.4294	3767254.747	94.88372093
853	12	33	5/3/2009	19:05:00	34.0454	-117.272383	474859.3747	3767223.314	129.1222037
854	12	34	5/7/2009	19:10:00	34.04315	-117.27155	474935.5979	3766973.632	238.7325196
855	13	Capture	10/7/2008	8:34:00	34.041267	-117.259067	476087.2688	3766761.859	6.008985179
856	13	Release	10/16/2008	8:07:00	34.0389	-117.256733	476302.0469	3766498.866	164.1495539
857	13	1	10/21/2008	19:52:00	34.038917	-117.256783	476297.4363	3766500.762	165.1830525
858	13	2	10/23/2008	16:26:00	34.038917	-117.256783	476297.4363	3766500.762	165.1830525
859	13	3	10/29/2008	13:56:00	34.038917	-117.256783	476297.4363	3766500.762	165.1830525
860	13	4	11/7/2008	15:38:00	34.038917	-117.256783	476297.4363	3766500.762	165.1830525
861	13	5	11/14/2008	16:25:00	34.03825	-117.257583	476223.4054	3766426.991	268.7333293
862	13	6	11/21/2008	15:01:00	34.038	-117.25755	476226.3817	3766399.264	289.0802743
863	14	Capture	12/8/2008	16:49:00	34.035333	-117.225367	479196.4468	3766096.542	0.354627086
864	14	Release	1/1/2009	13:27:00	34.034133	-117.224217	479302.3117	3765963.254	32.06660513
865	14	1	1/11/2009	15:51:00	34.0342	-117.22425	479299.2817	3765970.69	25.27593308
866	14	2	1/18/2009	14:23:00	34.0342	-117.22425	479299.2817	3765970.69	25.27593308
867	14	3	1/27/2009	14:50:00	34.0342	-117.22425	479299.2817	3765970.69	25.27593308
868	15	Capture	1/1/2009	12:10:00	34.041119	-117.260681	475938.2491	3766745.827	5.540564732
869	15	Release	1/19/2009	14:52:00	34.039283	-117.258183	476168.3102	3766541.669	233.5775688
870	15	1	1/26/2009	15:19:00	34.039033	-117.258967	476095.8724	3766514.132	248.5045718
871	15	2	2/1/2009	15:53:00	34.039033	-117.258967	476095.8724	3766514.132	248.5045718
872	15	3	2/10/2009	9:02:00	34.039033	-117.258967	476095.8724	3766514.132	248.5045718
873	15	4	2/15/2009	12:04:00	34.039033	-117.258967	476095.8724	3766514.132	248.5045718
874	15	5	2/20/2009	11:36:00	34.039033	-117.258967	476095.8724	3766514.132	248.5045718
875	15	6	2/27/2009	11:27:00	34.039033	-117.258967	476095.8724	3766514.132	248.5045718
876	15	7	3/6/2009	12:19:00	34.039033	-117.258967	476095.8724	3766514.132	248.5045718
877	15	8	3/13/2009	15:12:00	34.039033	-117.258967	476095.8724	3766514.132	248.5045718
878	15	9	3/19/2009	12:49:00	34.039033	-117.258967	476095.8724	3766514.132	248.5045718
879	15	10	3/27/2009	13:31:00	34.039017	-117.25885	476106.6677	3766512.331	251.1635873
880	15	11	3/31/2009	12:53:00	34.039017	-117.25885	476106.6677	3766512.331	251.1635873
881	15	12	4/5/2009	17:03:00	34.03905	-117.258709	476119.6921	3766515.957	249.2296339
882	15	13	4/9/2009	13:50:00	34.03905	-117.258709	476119.6921	3766515.957	249.2296339
883	15	14	4/12/2009	11:46:00	34.03905	-117.258709	476119.6921	3766515.957	249.2296339
884	15	15	4/16/2009	14:04:00	34.039083	-117.2588	476111.3015	3766519.637	244.4221416
885	15	16	4/19/2009	9:31:00	34.0397	-117.258683	476122.2742	3766588.022	178.9464302
886	15	17	4/24/2009	9:48:00	34.040083	-117.258567	476133.0889	3766630.462	141.5697612
887	15	18	4/29/2009	23:56:00	34.040317	-117.258617	476128.5392	3766656.419	115.8685569
888	15	19	5/3/2009	16:45:00	34.040317	-117.258617	476128.5392	3766656.419	115.8685569
889	15	20	5/10/2009	11:15:00	34.0411	-117.259833	476016.5173	3766743.522	67.39462918
890	15	21	5/17/2009	17:50:00	34.04065	-117.2592	476074.8192	3766693.478	69.03122722
891	15	22	5/22/2009	10:41:00	34.040767	-117.2596	476037.9304	3766706.544	70.54574055
892	15	23	6/2/2009	7:00:00	34.041167	-117.259133	476081.1487	3766750.787	11.42081222
893	15	24	6/9/2009	8:33:00	34.041167	-117.259133	476081.1487	3766750.787	11.42081222
894	15	25	6/15/2009	10:17:00	34.041167	-117.259133	476081.1487	3766750.787	11.42081222
895	15	26	6/21/2009	18:28:00	34.041167	-117.259133	476081.1487	3766750.787	11.42081222
896	15	27	7/6/2009	7:43:00	34.040733	-117.259483	476048.7204	3766702.747	67.78629875
897	15	28	7/12/2009	19:48:00	34.04075	-117.2594	476056.3864	3766704.613	62.73975911
898	15	29	7/16/2009	8:16:00	34.040767	-117.25865	476125.6193	3766706.322	70.17135182
899	15	30	7/23/2009	19:39:00	34.041	-117.259183	476076.4866	3766732.282	30.30504569
900	15	31	7/31/2009	7:42:00	34.040833	-117.258983	476094.9005	3766713.718	50.36856653
901	16	Capture	2/27/2009	9:47:00	34.04535	-117.27385	474723.9571	3767218.132	164.8187243
902	16	Release	3/6/2009	10:30:00	34.04535	-117.27385	474723.9571	3767218.132	164.8187243
903	16	1	3/13/2009	11:59:00	34.04535	-117.274017	474708.5432	3767218.173	173.2316898
904	16	2	3/19/2009	9:04:00	34.04535	-117.274017	474708.5432	3767218.173	173.2316898
905	16	3	3/27/2009	10:55:00	34.045167	-117.273867	474722.3337	3767197.845	183.2660829
906	16	4	3/31/2009	11:58:00	34.045067	-117.274867	474630.0046	3767187.005	145.2098085
907	16	5	4/5/2009	14:40:00	34.044833	-117.274517	474662.2398	3767160.972	175.2785936
908	16	6	4/9/2009	11:11:00	34.044717	-117.27495	474622.2395	3767148.217	135.9754674
909	16	7	4/12/2009	9:39:00	34.044717	-117.27495	474622.2395	3767148.217	135.9754674
910	16	8	4/16/2009	10:44:00	34.044717	-117.27495	474622.2395	3767148.217	135.9754674
911	16	9	4/29/2009	8:37:00	34.045483	-117.274783	474637.8816	3767233.11	166.8320525
912	16	10	5/3/2009	17:57:00	34.045483	-117.274783	474637.8816	3767233.11	166.8320525
913	16	11	5/7/2009	18:20:00	34.045683	-117.274483	474665.6308	3767255.211	177.1250716
914	16	12	5/17/2009	19:48:00	34.045483	-117.2744	474673.2321	3767233.015	185.393066
915	16	13	5/24/2009	9:40:00	34.045483	-117.2744	474673.2321	3767233.015	185.393066
916	16	14	6/1/2009	15:10:00	34.045483	-117.2744	474673.2321	3767233.015	185.393066
917	16	15	6/8/2009	9:56:00	34.045483	-117.2744	474673.2321	3767233.015	185.393066
918	16	16	6/14/2009	9:43:00	34.045467	-117.274417	474671.6583	3767231.245	187.7512331
919	16	17	6/21/2009	17:29:00	34.045483	-117.2743	474682.462	3767232.99	178.7681688
920	16	18	7/2/2009	18:40:00	34.045483	-117.2743	474682.462	3767232.99	178.7681688
921	16	19	7/8/2009	7:12:00	34.045483	-117.2743	474682.462	3767232.99	178.7681688
922	16	20	7/15/2009	19:38:00	34.045483	-117.2743	474682.462	3767232.99	178.7681688
923	16	21	7/22/2009	7:08:00	34.045633	-117.274317	474680.9375	3767249.626	168.5736528
924	16	22	7/28/2009	20:42:00	34.045633	-117.274317	474680.9375	3767249.626	168.5736528
925	16	23	8/6/2009	7:32:00	34.045633	-117.274317	474680.9375	3767249.626	168.5736528
926	16	24	8/11/2009	20:26:00	34.045633	-117.274317	474680.9375	3767249.626	168.5736528
927	16	25	8/18/2009	7:28:00	34.045633	-117.274317	474680.9375	3767249.626	168.5736528
928	16	26	8/23/2009	20:50:00	34.045483	-117.274333	474679.4162	3767232.998	180.929277
929	16	27	8/24/2009	18:27:00	34.045483	-117.274333	474679.4162	3767232.998	180.929277
930	16	28	8/25/2009	6:48:00	34.045483	-117.274333	474679.4162	3767232.998	180.929277
931	16	29	8/26/2009	20:21:00	34.045483	-117.274333	474679.4162	3767232.998	180.929277
932	16	30	8/28/2009	6:53:00	34.045433	-117.274283	474684.0163	3767227.442	181.6611722
933	16	Relocate	9/3/2009	6:59:00	34.0455	-117.2743	474682.4671	3767234.875	177.4367542
934	16	31	9/8/2009	19:12:00	34.045117	-117.2741	474700.8131	3767192.359	198.9402268
935	16	32	9/15/2009	8:18:00	34.045283	-117.27485	474631.638	3767210.95	152.7310552
936	16	33	9/23/2009	8:30:00	34.045317	-117.27445	474668.5678	3767214.621	189.0740946
937	16	34	9/30/2009	7:42:00	34.045333	-117.2744	474673.1875	3767216.383	194.002088
938	16	35	10/9/2009	8:04:00	34.045333	-117.2744	474673.1875	3767216.383	194.002088
939	16	36	10/14/2009	9:27:00	34.045217	-117.27415	474696.2279	3767203.459	192.3653455
940	16	37	10/15/2009	9:01:00	34.045217	-117.27415	474696.2279	3767203.459	192.3653455
941	16	38	10/20/2009	9:29:00	34.045333	-117.2738	474728.567	3767216.234	164.1441345
942	16	39	10/21/2009	9:54:00	34.045333	-117.2738	474728.567	3767216.234	164.1441345
943	16	40	10/27/2009	9:10:00	34.045817	-117.27365	474742.5554	3767269.863	111.4168932
944	16	41	10/28/2009	9:05:00	34.045817	-117.27365	474742.5554	3767269.863	111.4168932
945	16	42	11/3/2009	9:33:00	34.045817	-117.27365	474742.5554	3767269.863	111.4168932
946	16	43	11/5/2009	10:01:00	34.045817	-117.273683	474739.5095	3767269.871	113.2502012
947	16	44	11/10/2009	10:44:00	34.045817	-117.273683	474739.5095	3767269.871	113.2502012
948	16	45	11/12/2009	9:49:00	34.045817	-117.273683	474739.5095	3767269.871	113.2502012
949	16	46	11/17/2009	12:25:00	34.045817	-117.273683	474739.5095	3767269.871	113.2502012
950	16	47	11/20/2009	9:42:00	34.045817	-117.273683	474739.5095	3767269.871	113.2502012
951	16	48	11/24/2009	11:33:00	34.045817	-117.273683	474739.5095	3767269.871	113.2502012
952	16	49	12/4/2009	9:25:00	34.045817	-117.273683	474739.5095	3767269.871	113.2502012
953	16	50	12/9/2009	11:37:00	34.045817	-117.273683	474739.5095	3767269.871	113.2502012
954	16	51	12/16/2009	11:45:00	34.045817	-117.273683	474739.5095	3767269.871	113.2502012
955	16	52	12/22/2009	12:21:00	34.045817	-117.273683	474739.5095	3767269.871	113.2502012
956	16	53	12/29/2009	12:30:00	34.045817	-117.273683	474739.5095	3767269.871	113.2502012
957	16	54	1/5/2010	11:27:00	34.045817	-117.273683	474739.5095	3767269.871	113.2502012
958	16	55	1/12/2010	11:09:00	34.045817	-117.273683	474739.5095	3767269.871	113.2502012
959	16	56	1/19/2010	11:13:00	34.045817	-117.273683	474739.5095	3767269.871	113.2502012
960	16	57	1/26/2010	12:10:00	34.04575	-117.273667	474740.9664	3767262.438	118.3706293
961	16	58	1/28/2010	10:30:00	34.045817	-117.273667	474740.9863	3767269.867	112.354845
962	16	59	2/2/2010	10:06:00	34.045817	-117.273667	474740.9863	3767269.867	112.354845
963	16	60	2/11/2010	10:31:00	34.045817	-117.273667	474740.9863	3767269.867	112.354845
964	16	61	2/16/2010	10:32:00	34.045817	-117.273667	474740.9863	3767269.867	112.354845
965	16	62	2/23/2010	10:37:00	34.045783	-117.273683	474739.4995	3767266.101	116.2590478
966	16	63	3/4/2010	10:46:00	34.045783	-117.273683	474739.4995	3767266.101	116.2590478
967	16	64	3/9/2010	11:04:00	34.045783	-117.273683	474739.4995	3767266.101	116.2590478
968	16	65	3/12/2010	10:37:00	34.045783	-117.273683	474739.4995	3767266.101	116.2590478
969	16	66	3/16/2010	11:14:00	34.045783	-117.273683	474739.4995	3767266.101	116.2590478
970	16	67	3/18/2010	11:27:00	34.045783	-117.273683	474739.4995	3767266.101	116.2590478
971	16	68	3/31/2010	10:03:00	34.045472	-117.273604	474746.6989	3767231.598	142.115484
972	16	69	4/7/2010	11:59:00	34.045472	-117.273604	474746.6989	3767231.598	142.115484
973	16	70	4/9/2010	11:32:00	34.04505	-117.27425	474686.9483	3767184.967	201.2987768
974	16	71	4/13/2010	10:36:00	34.045467	-117.27475	474640.9227	3767231.327	168.8481167
975	16	72	4/15/2010	13:14:00	34.045433	-117.275117	474607.0389	3767227.648	136.849609
976	16	73	4/20/2010	10:02:00	34.045217	-117.27415	474696.2279	3767203.459	192.3653455
977	16	74	4/22/2010	12:46:00	34.045217	-117.27415	474696.2279	3767203.459	192.3653455
978	16	Release	4/23/2010	15:21:00	34.045217	-117.27415	474696.2279	3767203.459	192.3653455
979	16	75	4/27/2010	11:13:00	34.045067	-117.274033	474706.9823	3767186.798	200.4258353
980	16	76	4/29/2010	10:34:00	34.0451	-117.27425	474686.9632	3767190.511	202.0212125
981	16	77	5/4/2010	10:18:00	34.045617	-117.274867	474630.1684	3767247.988	161.0773769
982	16	78	5/6/2010	12:29:00	34.046083	-117.274733	474642.6752	3767299.625	163.107836
983	16	79	5/11/2010	13:12:00	34.045767	-117.2752	474599.4776	3767264.703	133.2311098
984	16	80	5/13/2010	12:06:00	34.045633	-117.27505	474613.2825	3767249.808	144.4304811
985	16	81	5/18/2010	10:23:00	34.04555	-117.27445	474668.6371	3767240.456	183.8831083
986	16	82	5/20/2010	15:39:00	34.045655	-117.274521	474662.1151	3767252.116	181.7892484
987	16	83	5/25/2010	10:39:00	34.045917	-117.274617	474653.3324	3767281.19	172.2798449
988	16	84	5/27/2010	14:38:00	34.046283	-117.274683	474647.3496	3767321.788	143.0698864
989	16	85	6/1/2010	12:07:00	34.045633	-117.275083	474610.2366	3767249.816	141.4020587
990	16	86	6/3/2010	12:44:00	34.045967	-117.274017	474708.7263	3767286.586	123.8183023
991	16	87	6/10/2010	9:12:00	34.04595	-117.273967	474713.3362	3767284.688	121.279762
992	16	88	6/17/2010	10:46:00	34.04595	-117.273967	474713.3362	3767284.688	121.279762
993	16	89	6/23/2010	10:15:00	34.0458	-117.274133	474697.9701	3767268.097	143.6493533
994	16	90	6/28/2010	9:10:00	34.0458	-117.274133	474697.9701	3767268.097	143.6493533
995	16	91	6/30/2010	11:04:00	34.0458	-117.274133	474697.9701	3767268.097	143.6493533
996	16	92	7/6/2010	19:55:00	34.045867	-117.274767	474639.4727	3767275.683	174.6777568
997	16	93	7/8/2010	18:05:00	34.045483	-117.274883	474628.6517	3767233.134	158.5422149
998	16	94	7/15/2010	8:06:00	34.045217	-117.27425	474686.9979	3767203.484	197.892367
999	16	95	7/20/2010	9:08:00	34.04525	-117.274483	474665.502	3767207.2	184.1709444
1000	16	96	7/22/2010	8:00:00	34.045767	-117.275233	474596.4318	3767264.711	130.2661404
1001	16	97	7/27/2010	7:55:00	34.044983	-117.274833	474633.1178	3767177.682	146.9926881
1002	16	98	7/29/2010	7:47:00	34.045233	-117.27485	474631.6231	3767205.406	151.0312006
1003	16	99	8/5/2010	9:36:00	34.04535	-117.274733	474642.457	3767218.35	165.3890044
1004	16	100	8/10/2010	9:58:00	34.045217	-117.274517	474662.354	3767203.55	180.2446193
1005	16	101	8/12/2010	9:27:00	34.045217	-117.274517	474662.354	3767203.55	180.2446193
1006	16	102	8/17/2010	8:27:00	34.045333	-117.27485	474631.6529	3767216.494	154.6111226
1007	16	103	8/19/2010	10:31:00	34.045333	-117.27485	474631.6529	3767216.494	154.6111226
1008	16	104	8/24/2010	9:32:00	34.045333	-117.27485	474631.6529	3767216.494	154.6111226
1009	16	105	8/26/2010	9:03:00	34.045533	-117.274933	474624.0517	3767238.691	154.4742256
1010	16	106	8/31/2010	10:17:00	34.045417	-117.275183	474600.9423	3767225.891	130.6647745
1011	16	107	9/2/2010	9:48:00	34.045433	-117.27505	474613.2229	3767227.632	142.2991236
1012	16	108	9/7/2010	8:07:00	34.0452	-117.27455	474659.3031	3767201.673	176.8467567
1013	16	109	9/9/2010	8:51:00	34.0452	-117.27455	474659.3031	3767201.673	176.8467567
1014	16	110	9/14/2010	8:16:00	34.045117	-117.27415	474696.1982	3767192.371	201.4744213
1015	16	Release	9/27/2010	7:50:00	34.045367	-117.2744	474673.1976	3767220.153	194.4124438
1016	16	111	9/29/2010	8:19:00	34.045633	-117.2737	474737.8859	3767249.474	130.848374
1017	16	112	10/4/2010	10:57:00	34.045967	-117.273867	474722.5711	3767286.549	112.937201
1018	16	113	10/11/2010	8:21:00	34.045967	-117.273867	474722.5711	3767286.549	112.937201
1019	16	114	10/13/2010	8:52:00	34.045583	-117.273817	474727.0721	3767243.959	141.4794774
1020	16	115	10/18/2010	8:52:00	34.0455	-117.273633	474744.0305	3767234.71	140.5350544
1021	16	116	10/27/2010	8:34:00	34.0455	-117.273633	474744.0305	3767234.71	140.5350544
1022	16	117	11/3/2010	10:21:00	34.045633	-117.2737	474737.8859	3767249.474	130.848374
1023	16	118	11/12/2010	10:29:00	34.0455	-117.274317	474680.898	3767234.879	178.5552521
1024	16	119	11/17/2010	8:37:00	34.0455	-117.274317	474680.898	3767234.879	178.5552521
1025	16	120	12/1/2010	7:40:00	34.0455	-117.274317	474680.898	3767234.879	178.5552521
1026	16	121	12/8/2010	10:59:00	34.0455	-117.274317	474680.898	3767234.879	178.5552521
1027	16	122	12/15/2010	8:16:00	34.0455	-117.274317	474680.898	3767234.879	178.5552521
1028	16	123	12/30/2010	11:16:00	34.0455	-117.274317	474680.898	3767234.879	178.5552521
1029	16	124	1/6/2011	8:22:00	34.0455	-117.274317	474680.898	3767234.879	178.5552521
1030	16	125	1/13/2011	10:14:00	34.0455	-117.274317	474680.898	3767234.879	178.5552521
1031	16	126	1/20/2011	7:30:00	34.045617	-117.2743	474682.5018	3767247.848	168.5607188
1032	16	127	1/27/2011	8:31:00	34.045617	-117.2743	474682.5018	3767247.848	168.5607188
1033	16	128	2/3/2011	10:04:00	34.045617	-117.2743	474682.5018	3767247.848	168.5607188
1034	16	129	2/10/2011	8:38:00	34.0455	-117.27435	474677.8521	3767234.887	180.74542
1035	16	130	2/17/2011	8:34:00	34.0455	-117.27435	474677.8521	3767234.887	180.74542
1036	16	131	2/24/2011	8:25:00	34.0455	-117.27435	474677.8521	3767234.887	180.74542
1037	16	132	3/3/2011	10:17:00	34.0455	-117.27435	474677.8521	3767234.887	180.74542
1038	16	133	3/10/2011	9:01:00	34.0455	-117.274283	474684.0362	3767234.871	176.3251247
1039	16	134	3/15/2011	8:26:00	34.0456	-117.27485	474631.7324	3767246.099	162.4950666
1040	16	135	3/17/2011	10:20:00	34.045583	-117.274583	474656.3712	3767244.148	186.9762128
1041	16	136	3/22/2011	8:52:00	34.045717	-117.274417	474671.7326	3767258.965	169.9832163
1042	16	137	3/24/2011	12:05:00	34.045719	-117.27452	474662.2264	3767259.212	177.6024301
1043	16	138	3/29/2011	8:53:00	34.045683	-117.27465	474650.2169	3767255.252	181.736651
1044	16	139	3/31/2011	11:01:00	34.045733	-117.274633	474651.8009	3767260.792	184.0084298
1045	16	140	4/5/2011	8:37:00	34.04575	-117.274433	474670.2656	3767262.628	169.0460197
1046	16	141	4/12/2011	8:54:00	34.0458	-117.274383	474674.8954	3767268.159	162.0947485
1047	16	142	4/14/2011	11:04:00	34.045583	-117.2742	474691.7216	3767244.053	164.4029786
1048	16	143	4/19/2011	8:56:00	34.045783	-117.2738	474728.7005	3767266.13	122.987252
1049	16	144	4/21/2011	10:53:00	34.045067	-117.273967	474713.0741	3767186.782	197.4124174
1050	16	145	4/26/2011	8:43:00	34.045383	-117.274967	474620.8688	3767222.067	146.7606521
1051	16	146	4/28/2011	13:01:00	34.045467	-117.275233	474596.3423	3767231.447	126.7649954
1052	16	147	5/3/2011	11:44:00	34.045717	-117.275083	474610.2617	3767259.13	142.7106538
1053	16	148	5/10/2011	9:41:00	34.045767	-117.275267	474593.2936	3767264.719	127.2151615
1054	16	149	5/19/2011	9:02:00	34.045617	-117.274817	474634.7834	3767247.976	165.6765788
1055	16	150	6/8/2011	7:57:00	34.045817	-117.274133	474697.9752	3767269.982	142.4548765
1056	16	151	6/15/2011	12:50:00	34.045817	-117.274133	474697.9752	3767269.982	142.4548765
1057	16	152	6/22/2011	8:13:00	34.045817	-117.274133	474697.9752	3767269.982	142.4548765
1058	16	153	6/28/2011	8:23:00	34.045617	-117.27415	474696.3467	3767247.811	158.4716173
1059	16	154	7/5/2011	7:54:00	34.0457	-117.2746	474654.8369	3767257.125	184.8975871
1060	16	155	7/13/2011	9:19:00	34.045818	-117.274478	474666.1324	3767270.179	168.3307304
1061	16	156	7/26/2011	9:07:00	34.045767	-117.27415	474696.3912	3767264.443	147.201794
1062	16	157	8/12/2011	8:29:00	34.045767	-117.27415	474696.3912	3767264.443	147.201794
1063	16	158	8/19/2011	9:32:00	34.045767	-117.27415	474696.3912	3767264.443	147.201794
1064	16	159	8/28/2011	8:03:00	34.045767	-117.27415	474696.3912	3767264.443	147.201794
1065	16	160	9/6/2011	7:42:00	34.045767	-117.27415	474696.3912	3767264.443	147.201794
1066	16	161	9/13/2011	8:45:00	34.045767	-117.27415	474696.3912	3767264.443	147.201794
1067	16	162	9/19/2011	8:20:00	34.045767	-117.27415	474696.3912	3767264.443	147.201794
1068	16	163	9/26/2011	9:00:00	34.045417	-117.275067	474611.649	3767225.862	140.088794
1069	16	164	10/3/2011	9:01:00	34.045367	-117.27495	474622.4331	3767220.289	147.477547
1070	16	165	10/11/2011	8:48:00	34.045295	-117.274727	474642.9944	3767212.25	163.9227084
1071	16	Final_Release	10/12/2011	8:09:00	34.045327	-117.274707	474644.8499	3767215.794	166.7988888
1072	17	Capture	3/13/2009	11:47:00	34.045417	-117.273683	474739.3909	3767225.519	150.8299944
1073	17	Release	3/16/2009	16:00:00	34.045417	-117.273683	474739.3909	3767225.519	150.8299944
1074	17	1	3/19/2009	9:04:00	34.045317	-117.273917	474717.7633	3767214.489	171.1666834
1075	17	2	3/27/2009	10:26:00	34.045367	-117.273967	474713.1632	3767220.046	169.0501811
1076	17	3	3/31/2009	10:20:00	34.045383	-117.274017	474708.553	3767221.832	170.2563632
1077	17	4	4/5/2009	14:27:00	34.045383	-117.274017	474708.553	3767221.832	170.2563632
1078	17	5	4/9/2009	12:01:00	34.04555	-117.273333	474771.735	3767240.18	124.036401
1079	17	6	4/12/2009	9:52:00	34.04555	-117.273333	474771.735	3767240.18	124.036401
1080	17	7	4/16/2009	11:24:00	34.045433	-117.272467	474851.6313	3767226.994	124.0041163
1081	17	8	4/19/2009	11:23:00	34.0451	-117.2726	474839.2572	3767190.104	159.3588456
1082	17	9	4/22/2009	17:00:00	34.045833	-117.27305	474797.9393	3767271.489	84.4173282
1083	17	10	4/29/2009	9:02:00	34.046733	-117.2739	474719.7526	3767371.49	61.45171191
1084	17	11	5/3/2009	17:31:00	34.0473	-117.274033	474707.6453	3767434.392	24.03513243
1085	17	12	5/7/2009	18:08:00	34.047183	-117.274333	474679.9214	3767421.493	53.61724229
1086	17	13	5/17/2009	19:24:00	34.047183	-117.274083	474702.9957	3767421.431	35.53983233
1087	17	14	5/24/2009	9:22:00	34.04695	-117.274167	474695.1736	3767395.617	57.73801247
1088	17	15	6/1/2009	14:52:00	34.04695	-117.274167	474695.1736	3767395.617	57.73801247
1089	17	16	6/8/2009	9:47:00	34.04695	-117.274167	474695.1736	3767395.617	57.73801247
1090	17	17	6/14/2009	9:26:00	34.04695	-117.274167	474695.1736	3767395.617	57.73801247
1091	17	18	6/21/2009	17:08:00	34.045633	-117.272983	474804.0641	3767249.297	103.4619487
1092	17	19	7/2/2009	18:59:00	34.045483	-117.273317	474773.1919	3767232.747	129.9673581
1093	17	Release	10/13/2009	14:30:00	34.045417	-117.274283	474684.0115	3767225.668	182.9570209
1094	17	20	10/14/2009	9:36:00	34.045333	-117.27405	474705.4922	3767216.296	176.5344973
1095	17	21	10/15/2009	9:28:00	34.045567	-117.2728	474820.9353	3767241.934	107.7597104
1096	17	22	10/20/2009	10:28:00	34.0472	-117.274	474710.6614	3767423.296	28.67087633
1097	17	23	10/21/2009	11:00:00	34.047267	-117.274083	474703.0207	3767430.745	29.86942576
1098	17	24	10/27/2009	7:54:00	34.0472	-117.274817	474635.2547	3767423.498	89.02976136
1099	17	25	10/28/2009	9:44:00	34.04705	-117.2742	474692.1575	3767406.713	53.25100698
1100	17	26	11/3/2009	8:25:00	34.047517	-117.274017	474709.1865	3767458.449	9.338460836
1101	17	Relocate	11/3/2009	8:35:00	34.047227	-117.274031	474707.8082	3767426.297	28.73466203
1102	17	27	11/5/2009	8:56:00	34.047333	-117.274483	474666.1215	3767438.162	55.02588316
1103	17	28	11/10/2009	11:19:00	34.047517	-117.27405	474706.1407	3767458.457	11.3230657
1104	17	Relocate	11/10/2009	11:25:00	34.047233	-117.273983	474712.2403	3767426.95	24.96268707
1105	17	29	11/12/2009	10:44:00	34.047283	-117.274067	474704.5022	3767432.515	27.56988388
1106	17	30	11/17/2009	10:26:00	34.046933	-117.274433	474670.6174	3767393.798	78.10548153
1107	17	31	11/20/2009	8:33:00	34.047167	-117.274767	474639.8597	3767419.826	87.03976367
1108	17	32	11/24/2009	11:44:00	34.047291	-117.27413	474698.6898	3767433.418	31.40930112
1109	17	33	12/4/2009	9:17:00	34.04625	-117.273833	474725.7932	3767317.919	92.86097507
1110	17	34	12/9/2009	11:28:00	34.04605	-117.273433	474762.6532	3767295.644	78.7416433
1111	17	35	12/16/2009	11:52:00	34.046233	-117.273917	474718.0351	3767316.055	100.6509692
1112	17	36	12/22/2009	0:11:00	34.0468	-117.27455	474659.779	3767379.08	95.70098835
1113	17	37	12/29/2009	11:16:00	34.047067	-117.27405	474706.0071	3767408.561	41.31729356
1114	17	38	1/5/2010	11:11:00	34.04705	-117.27425	474687.5426	3767406.726	56.84300693
1115	17	39	1/12/2010	12:36:00	34.047067	-117.274883	474629.1235	3767408.767	102.149526
1116	17	40	1/19/2010	10:35:00	34.046867	-117.274867	474630.5407	3767386.587	113.9256226
1117	17	41	1/26/2010	11:51:00	34.046917	-117.274833	474633.6937	3767392.123	107.997171
1118	17	42	1/28/2010	11:19:00	34.046917	-117.274833	474633.6937	3767392.123	107.997171
1119	18	Capture	3/13/2009	13:02:00	34.04355	-117.271017	474984.912	3767017.853	174.5140525
1120	18	Release	3/16/2009	16:20:00	34.04355	-117.271017	474984.912	3767017.853	174.5140525
1121	18	1	3/19/2009	9:57:00	34.043883	-117.270633	475020.4532	3767054.682	127.9546114
1122	18	2	3/27/2009	11:28:00	34.04385	-117.270583	475025.0586	3767051.011	124.7260192
1123	19	Capture	6/14/2009	11:39:00	34.043839	-117.268992	475171.9059	3767049.404	3.611330698
1124	19	Release	10/13/2009	14:30:00	34.045417	-117.274283	474684.0115	3767225.668	182.9570209
1125	19	1	10/14/2009	9:18:00	34.045433	-117.2742	474691.6771	3767227.421	176.4989894
1126	19	2	10/15/2009	9:54:00	34.044017	-117.274867	474629.6919	3767070.581	169.4942888
1127	19	3	10/16/2009	7:32:00	34.0438	-117.2755	474571.2009	3767046.678	142.8096244
1128	19	4	10/20/2009	7:59:00	34.042133	-117.275983	474526.1212	3766861.962	70.59943617
1129	19	5	10/21/2009	10:36:00	34.042033	-117.27575	474547.5978	3766850.816	74.54681553
1130	19	6	10/27/2009	12:12:00	34.042217	-117.275983	474526.1463	3766871.276	79.00730386
1131	19	7	10/28/2009	10:17:00	34.042217	-117.275983	474526.1463	3766871.276	79.00730386
1132	19	8	11/3/2009	9:07:00	34.042217	-117.275983	474526.1463	3766871.276	79.00730386
1133	19	9	11/5/2009	9:45:00	34.042217	-117.275983	474526.1463	3766871.276	79.00730386
1134	19	10	11/10/2009	12:31:00	34.042133	-117.27595	474529.1672	3766861.954	72.03659588
1135	19	11	11/12/2009	11:04:00	34.042183	-117.275983	474526.1361	3766867.506	75.57846683
1136	19	12	11/17/2009	12:07:00	34.042167	-117.27585	474538.4076	3766865.699	80.07443255
1137	19	13	11/20/2009	8:55:00	34.042167	-117.27585	474538.4076	3766865.699	80.07443255
1138	19	14	11/24/2009	12:38:00	34.042167	-117.27585	474538.4076	3766865.699	80.07443255
1139	19	15	12/4/2009	10:11:00	34.042167	-117.27585	474538.4076	3766865.699	80.07443255
1140	19	16	12/9/2009	11:59:00	34.042167	-117.27585	474538.4076	3766865.699	80.07443255
1141	19	17	12/16/2009	11:26:00	34.042167	-117.27585	474538.4076	3766865.699	80.07443255
1142	19	18	12/22/2009	13:08:00	34.042167	-117.27585	474538.4076	3766865.699	80.07443255
1143	19	19	12/29/2009	11:33:00	34.042167	-117.27585	474538.4076	3766865.699	80.07443255
1144	19	20	1/5/2010	12:29:00	34.042167	-117.27585	474538.4076	3766865.699	80.07443255
1145	19	21	1/12/2010	12:18:00	34.042167	-117.27585	474538.4076	3766865.699	80.07443255
1146	19	22	1/19/2010	10:16:00	34.042167	-117.27585	474538.4076	3766865.699	80.07443255
1147	19	23	1/26/2010	13:24:00	34.042233	-117.2759	474533.8122	3766873.029	83.97753353
1148	19	24	2/2/2010	10:06:00	34.04225	-117.275917	474532.2481	3766874.918	84.92449705
1149	19	25	2/11/2010	10:04:00	34.04225	-117.275917	474532.2481	3766874.918	84.92449705
1150	19	26	2/16/2010	10:06:00	34.042267	-117.27635	474492.2863	3766876.911	77.74624101
1151	19	27	2/23/2010	11:25:00	34.042267	-117.27635	474492.2863	3766876.911	77.74624101
1152	19	28	3/2/2010	11:42:00	34.042267	-117.276317	474495.3322	3766876.903	77.73742377
1153	19	29	3/4/2010	10:13:00	34.042267	-117.276317	474495.3322	3766876.903	77.73742377
1154	19	30	3/9/2010	11:44:00	34.042267	-117.276317	474495.3322	3766876.903	77.73742377
1155	19	31	3/12/2010	11:41:00	34.042267	-117.276317	474495.3322	3766876.903	77.73742377
1156	19	32	3/16/2010	10:29:00	34.0423	-117.2761	474515.3717	3766880.508	84.13244065
1157	19	33	3/18/2010	12:06:00	34.042433	-117.276083	474516.9807	3766895.251	98.82088847
1158	19	34	4/9/2010	13:06:00	34.04425	-117.271133	474974.4107	3767095.497	168.3791847
1159	19	35	4/13/2010	11:29:00	34.04455	-117.271167	474971.3606	3767128.769	171.5389632
1160	19	36	4/15/2010	11:47:00	34.045433	-117.2697	475107.0227	3767226.318	17.21920115
1161	19	Relocate	4/15/2010	11:52:00	34.044833	-117.270467	475036.0535	3767159.977	107.6151469
1162	19	37	4/20/2010	10:45:00	34.044233	-117.269617	475114.333	3767093.242	28.44241874
1163	19	38	4/22/2010	14:28:00	34.04375	-117.269367	475137.2671	3767039.627	30.35495634
1164	19	39	4/27/2010	11:59:00	34.04375	-117.269367	475137.2671	3767039.627	30.35495634
1165	19	40	4/29/2010	11:19:00	34.04375	-117.269367	475137.2671	3767039.627	30.35495634
1166	19	41	5/4/2010	12:02:00	34.04375	-117.269367	475137.2671	3767039.627	30.35495634
1167	19	42	5/6/2010	11:15:00	34.04375	-117.269367	475137.2671	3767039.627	30.35495634
1168	19	43	5/11/2010	11:01:00	34.04375	-117.269367	475137.2671	3767039.627	30.35495634
1169	19	44	5/13/2010	10:21:00	34.04375	-117.269367	475137.2671	3767039.627	30.35495634
1170	19	45	5/18/2010	12:28:00	34.04375	-117.269367	475137.2671	3767039.627	30.35495634
1171	19	46	5/20/2010	23:57:00	34.04375	-117.269367	475137.2671	3767039.627	30.35495634
1172	19	47	5/25/2010	12:43:00	34.043617	-117.2694	475134.1824	3767024.888	41.0987489
1173	19	48	5/27/2010	16:51:00	34.043284	-117.26903	475168.2367	3766987.875	18.41247323
1174	19	49	6/1/2010	10:43:00	34.0434	-117.269117	475160.2403	3767000.758	21.95653654
1175	19	50	6/3/2010	11:04:00	34.0434	-117.269117	475160.2403	3767000.758	21.95653654
1176	19	51	6/10/2010	11:43:00	34.0434	-117.269117	475160.2403	3767000.758	21.95653654
1177	19	52	6/17/2010	12:31:00	34.0434	-117.269117	475160.2403	3767000.758	21.95653654
1178	19	53	6/23/2010	9:18:00	34.043517	-117.269283	475144.9524	3767013.772	35.39053524
1179	19	54	6/28/2010	12:02:00	34.0433	-117.26905	475166.3953	3766989.654	19.95639664
1180	19	55	6/30/2010	8:52:00	34.0433	-117.26905	475166.3953	3766989.654	19.95639664
1181	19	56	7/6/2010	18:07:00	34.043617	-117.269183	475154.2117	3767024.835	26.86052694
1182	19	57	7/8/2010	16:12:00	34.043633	-117.26925	475148.0322	3767026.625	29.86800706
1183	19	58	7/15/2010	9:21:00	34.0433	-117.268917	475178.6714	3766989.622	7.856426033
1184	19	59	7/20/2010	8:25:00	34.043767	-117.268933	475177.3306	3767041.406	0.430458072
1185	19	60	7/22/2010	9:49:00	34.043767	-117.268933	475177.3306	3767041.406	0.430458072
1186	19	61	7/27/2010	9:18:00	34.043867	-117.269	475171.1756	3767052.511	6.285274997
1187	19	62	7/29/2010	10:02:00	34.043788	-117.268963	475174.5677	3767043.742	3.501772206
1188	19	63	8/5/2010	8:06:00	34.043867	-117.269	475171.1756	3767052.511	6.285274997
1189	19	64	8/10/2010	8:57:00	34.043867	-117.269	475171.1756	3767052.511	6.285274997
1190	19	65	8/12/2010	8:23:00	34.043867	-117.269	475171.1756	3767052.511	6.285274997
1191	19	66	8/17/2010	10:40:00	34.04335	-117.2685	475217.1756	3766995.065	3.047966683
1192	19	67	8/19/2010	8:37:00	34.043317	-117.268417	475224.827	3766991.386	10.57303276
1193	19	Relocate	8/19/2010	8:45:00	34.043417	-117.269683	475108.0028	3767002.781	73.38821105
1194	19	68	8/24/2010	7:31:00	34.0431	-117.268467	475220.1488	3766967.337	2.136815092
1195	19	Relocate	8/24/2010	7:37:00	34.043417	-117.269683	475108.0028	3767002.781	73.38821105
1196	19	69	8/26/2010	7:24:00	34.043565	-117.269056	475165.9188	3767019.039	14.85670794
1197	19	70	8/31/2010	11:58:00	34.042983	-117.267983	475264.7888	3766954.247	4.755325116
1198	19	71	9/2/2010	7:43:00	34.043383	-117.2686	475207.9551	3766998.748	3.469634491
1199	19	Relocate	9/2/2010	7:47:00	34.04345	-117.26965	475111.0583	3767006.432	69.82062089
1200	19	72	9/7/2010	9:12:00	34.0433	-117.2692	475152.5501	3766989.691	32.25975
1201	19	73	9/9/2010	7:59:00	34.043483	-117.269233	475149.5576	3767009.989	31.21290549
1202	19	74	9/14/2010	9:23:00	34.0433	-117.26885	475184.8556	3766989.606	2.520629392
1203	19	75	9/16/2010	10:05:00	34.04335	-117.2688	475189.4852	3766995.137	4.716775269
1204	19	Relocate	9/16/2010	10:09:00	34.04345	-117.26965	475111.0583	3767006.432	69.82062089
1205	19	76	9/21/2010	9:43:00	34.043317	-117.269017	475169.4462	3766991.531	16.80037885
1206	19	77	9/23/2010	9:59:00	34.043317	-117.269017	475169.4462	3766991.531	16.80037885
1207	19	78	9/27/2010	8:30:00	34.04365	-117.268983	475172.6815	3767028.446	8.586875366
1208	19	79	9/29/2010	9:38:00	34.043533	-117.269383	475135.727	3767015.57	44.58168931
1209	19	80	10/4/2010	9:50:00	34.04355	-117.26925	475148.008	3767017.423	32.36708811
1210	19	Release	11/1/2010	9:11:00	34.043555	-117.269759	475101.0282	3767018.101	72.39993928
1211	19	81	11/3/2010	9:05:00	34.043583	-117.269333	475140.3566	3767021.102	39.30069864
1212	19	82	11/12/2010	9:27:00	34.043583	-117.269333	475140.3566	3767021.102	39.30069864
1213	19	83	11/19/2010	9:52:00	34.043583	-117.269333	475140.3566	3767021.102	39.30069864
1214	19	84	12/1/2010	9:59:00	34.043583	-117.269333	475140.3566	3767021.102	39.30069864
1215	19	85	12/8/2010	9:03:00	34.043778	-117.268973	475173.6418	3767042.636	3.622125805
1216	19	86	12/15/2010	11:04:00	34.043778	-117.268973	475173.6418	3767042.636	3.622125805
1217	19	87	12/30/2010	12:44:00	34.043778	-117.268973	475173.6418	3767042.636	3.622125805
1218	19	88	1/6/2011	10:00:00	34.043778	-117.268973	475173.6418	3767042.636	3.622125805
1219	19	89	1/13/2011	8:41:00	34.043767	-117.26901	475170.2235	3767041.425	4.579727163
1220	19	90	1/20/2011	9:19:00	34.043773	-117.268936	475177.0555	3767042.072	0.891448783
1221	19	91	1/27/2011	10:05:00	34.043773	-117.268936	475177.0555	3767042.072	0.891448783
1222	19	92	2/3/2011	8:53:00	34.043773	-117.268936	475177.0555	3767042.072	0.891448783
1223	19	93	2/10/2011	10:26:00	34.043773	-117.268936	475177.0555	3767042.072	0.891448783
1224	19	94	2/17/2011	9:51:00	34.043773	-117.268936	475177.0555	3767042.072	0.891448783
1225	19	95	2/24/2011	9:28:00	34.043773	-117.268936	475177.0555	3767042.072	0.891448783
1226	19	96	3/3/2011	8:40:00	34.043773	-117.268936	475177.0555	3767042.072	0.891448783
1227	19	97	3/10/2011	10:27:00	34.043883	-117.269083	475163.5193	3767054.305	2.521151652
1228	19	98	3/15/2011	10:54:00	34.043883	-117.269083	475163.5193	3767054.305	2.521151652
1229	19	99	3/17/2011	9:35:00	34.043883	-117.269083	475163.5193	3767054.305	2.521151652
1230	19	100	3/22/2011	11:18:00	34.043883	-117.269083	475163.5193	3767054.305	2.521151652
1231	19	101	3/24/2011	9:32:00	34.043883	-117.269083	475163.5193	3767054.305	2.521151652
1232	19	102	3/29/2011	11:12:00	34.043883	-117.269083	475163.5193	3767054.305	2.521151652
1233	19	103	3/31/2011	9:06:00	34.043883	-117.269083	475163.5193	3767054.305	2.521151652
1234	19	104	4/5/2011	10:51:00	34.043883	-117.269083	475163.5193	3767054.305	2.521151652
1235	19	105	4/12/2011	11:12:00	34.043883	-117.269083	475163.5193	3767054.305	2.521151652
1236	19	106	4/14/2011	9:39:00	34.043883	-117.269083	475163.5193	3767054.305	2.521151652
1237	19	107	4/19/2011	10:28:00	34.043883	-117.269083	475163.5193	3767054.305	2.521151652
1238	19	108	4/21/2011	8:47:00	34.043883	-117.269083	475163.5193	3767054.305	2.521151652
1239	19	109	4/26/2011	11:47:00	34.043883	-117.269083	475163.5193	3767054.305	2.521151652
1240	19	110	4/28/2011	10:46:00	34.04385	-117.269067	475164.9865	3767050.642	1.554921335
1241	19	111	5/3/2011	9:39:00	34.043833	-117.269433	475131.1995	3767048.846	33.86474903
1242	19	112	5/10/2011	11:39:00	34.04385	-117.269083	475163.5097	3767050.646	2.079859753
1243	19	113	5/19/2011	10:40:00	34.04385	-117.269083	475163.5097	3767050.646	2.079859753
1244	19	114	6/8/2011	9:51:00	34.04385	-117.268984	475172.6475	3767050.622	5.009743111
1245	19	115	6/15/2011	9:47:00	34.04385	-117.268984	475172.6475	3767050.622	5.009743111
1246	19	116	6/22/2011	10:39:00	34.04385	-117.268984	475172.6475	3767050.622	5.009743111
1247	19	117	6/30/2011	7:46:00	34.04385	-117.268984	475172.6475	3767050.622	5.009743111
1248	19	118	7/7/2011	9:20:00	34.04385	-117.268984	475172.6475	3767050.622	5.009743111
1249	19	119	7/15/2011	7:55:00	34.04385	-117.268984	475172.6475	3767050.622	5.009743111
1250	19	120	7/26/2011	18:25:00	34.04385	-117.268984	475172.6475	3767050.622	5.009743111
1251	19	121	8/4/2011	19:00:00	34.04385	-117.268984	475172.6475	3767050.622	5.009743111
1252	19	122	8/12/2011	9:25:00	34.04385	-117.268984	475172.6475	3767050.622	5.009743111
1253	19	123	8/21/2011	9:02:00	34.04385	-117.268984	475172.6475	3767050.622	5.009743111
1254	19	124	8/26/2011	7:34:00	34.043817	-117.268958	475175.0377	3767046.956	4.361467492
1255	19	Relocate	8/26/2011	7:42:00	34.043483	-117.26965	475111.068	3767010.091	68.34031993
1256	19	125	9/2/2011	7:40:00	34.043829	-117.268987	475172.3645	3767048.294	2.807860422
1257	19	126	9/12/2011	8:26:00	34.043829	-117.268987	475172.3645	3767048.294	2.807860422
1258	19	127	9/20/2011	9:28:00	34.043483	-117.268817	475187.9548	3767009.889	1.751360812
1259	19	128	9/27/2011	8:51:00	34.043767	-117.2689	475180.3766	3767041.398	3.422346039
1260	19	129	10/4/2011	8:40:00	34.043867	-117.269	475171.1756	3767052.511	6.285274997
1261	19	130	10/12/2011	9:35:00	34.043726	-117.26893	475177.5956	3767036.86	4.371914211
1262	19	131	10/17/2011	9:08:00	34.043261	-117.268347	475231.2718	3766985.159	5.564716548
1263	19	Final_Release	10/18/2011	9:13:00	34.044868	-117.27061	475022.8649	3767163.892	116.8901716
1264	20	Capture	10/14/2009	9:47:00	34.0457	-117.27435	474677.9116	3767257.063	166.2023689
1265	20	Release	10/20/2009	17:39:00	34.04565	-117.274333	474679.4658	3767251.515	168.4776462
1266	20	1	10/21/2009	8:02:00	34.0456	-117.274267	474685.5427	3767245.955	167.5685743
1267	20	2	10/27/2009	9:25:00	34.0456	-117.274267	474685.5427	3767245.955	167.5685743
1268	20	3	10/28/2009	9:15:00	34.0456	-117.274267	474685.5427	3767245.955	167.5685743
1269	20	4	11/3/2009	9:22:00	34.0456	-117.274267	474685.5427	3767245.955	167.5685743
1270	20	5	11/5/2009	10:19:00	34.0456	-117.274267	474685.5427	3767245.955	167.5685743
1271	20	6	11/10/2009	10:30:00	34.0456	-117.274267	474685.5427	3767245.955	167.5685743
1272	20	7	11/12/2009	9:40:00	34.0456	-117.274267	474685.5427	3767245.955	167.5685743
1273	20	8	11/17/2009	11:48:00	34.0456	-117.274267	474685.5427	3767245.955	167.5685743
1274	20	9	11/20/2009	10:22:00	34.0456	-117.274267	474685.5427	3767245.955	167.5685743
1275	20	10	11/24/2009	11:26:00	34.0456	-117.274267	474685.5427	3767245.955	167.5685743
1276	20	11	12/4/2009	10:29:00	34.0456	-117.274267	474685.5427	3767245.955	167.5685743
1277	20	12	12/9/2009	11:17:00	34.0456	-117.274267	474685.5427	3767245.955	167.5685743
1278	20	13	12/16/2009	11:11:00	34.0456	-117.274267	474685.5427	3767245.955	167.5685743
1279	20	14	12/22/2009	12:01:00	34.04625	-117.273967	474713.4253	3767317.952	104.0606501
1280	20	15	12/24/2009	12:29:00	34.04625	-117.273967	474713.4253	3767317.952	104.0606501
1281	20	16	12/29/2009	12:24:00	34.04625	-117.273967	474713.4253	3767317.952	104.0606501
1282	20	17	1/5/2010	11:20:00	34.04625	-117.273967	474713.4253	3767317.952	104.0606501
1283	20	18	1/12/2010	11:01:00	34.04625	-117.273967	474713.4253	3767317.952	104.0606501
1284	20	19	1/19/2010	11:19:00	34.04625	-117.273967	474713.4253	3767317.952	104.0606501
1285	20	20	1/26/2010	12:02:00	34.04625	-117.273967	474713.4253	3767317.952	104.0606501
1286	20	21	1/28/2010	10:19:00	34.046317	-117.273917	474718.06	3767325.369	96.98267248
1287	20	22	2/2/2010	9:28:00	34.046617	-117.274483	474665.9086	3767358.772	103.6806895
1288	20	23	2/11/2010	9:46:00	34.046633	-117.274667	474648.9305	3767360.592	115.7230759
1289	20	24	2/16/2010	9:44:00	34.046633	-117.274667	474648.9305	3767360.592	115.7230759
1290	20	25	2/23/2010	11:02:00	34.046167	-117.275867	474538.034	3767309.22	83.6135048
1291	20	26	3/2/2010	11:26:00	34.046167	-117.275867	474538.034	3767309.22	83.6135048
1292	20	27	3/4/2010	10:26:00	34.046167	-117.275867	474538.034	3767309.22	83.6135048
1293	20	28	3/9/2010	11:25:00	34.046167	-117.275867	474538.034	3767309.22	83.6135048
1294	20	29	3/12/2010	11:12:00	34.046167	-117.275867	474538.034	3767309.22	83.6135048
1295	20	30	3/16/2010	10:44:00	34.046167	-117.275867	474538.034	3767309.22	83.6135048
1296	20	31	3/18/2010	11:53:00	34.046167	-117.275867	474538.034	3767309.22	83.6135048
1297	20	32	3/31/2010	11:12:00	34.045807	-117.274879	474629.1174	3767269.058	163.1113547
1298	20	33	4/7/2010	12:17:00	34.045967	-117.27525	474594.9223	3767286.891	135.6590416
1299	20	34	4/9/2010	11:46:00	34.045967	-117.275217	474597.9682	3767286.883	138.47423
1300	20	35	4/13/2010	10:19:00	34.045967	-117.275217	474597.9682	3767286.883	138.47423
1301	20	36	4/15/2010	12:42:00	34.045967	-117.275217	474597.9682	3767286.883	138.47423
1302	20	37	4/19/2010	15:44:00	34.045742	-117.275323	474588.1174	3767261.961	121.5454785
1303	20	38	4/20/2010	9:43:00	34.045742	-117.275323	474588.1174	3767261.961	121.5454785
1304	20	39	4/22/2010	13:01:00	34.0458	-117.2752	474599.4875	3767268.362	134.106804
1305	20	40	4/27/2010	10:40:00	34.04575	-117.27515	474604.0875	3767262.805	137.3297041
1306	20	41	4/29/2010	10:04:00	34.046233	-117.275217	474598.0475	3767316.377	129.6764689
1307	20	42	5/4/2010	10:37:00	34.047067	-117.273983	474712.191	3767408.544	36.39888787
1308	20	43	5/6/2010	11:46:00	34.0472	-117.2745	474664.5129	3767423.419	64.65388657
1309	20	44	5/11/2010	12:12:00	34.047433	-117.275517	474570.7163	3767449.506	108.1310393
1310	20	45	5/13/2010	11:41:00	34.047333	-117.2761	474516.8773	3767438.563	79.04182136
1311	20	46	5/18/2010	10:45:00	34.046983	-117.276617	474469.0548	3767399.885	32.6762934
1312	20	47	5/20/2010	14:04:00	34.047033	-117.276467	474482.9144	3767405.391	36.63031164
1313	20	48	5/25/2010	9:58:00	34.047167	-117.275833	474541.471	3767420.091	80.37190185
1314	20	49	5/27/2010	14:53:00	34.04735	-117.2761	474516.8824	3767440.448	80.70994455
1315	20	50	6/1/2010	13:31:00	34.04695	-117.27685	474447.5396	3767396.284	37.9644982
1316	20	Relocate	6/1/2010	13:36:00	34.047367	-117.2759	474535.3468	3767442.284	92.20514194
1317	20	51	6/3/2010	0:56:00	34.047333	-117.276083	474518.4463	3767438.559	79.79239083
1318	20	52	6/10/2010	9:24:00	34.047267	-117.276183	474509.1969	3767431.266	69.0596529
1319	20	53	6/17/2010	10:15:00	34.04705	-117.276467	474482.9195	3767407.276	38.50792769
1320	20	54	6/23/2010	11:02:00	34.04695	-117.276667	474464.4301	3767396.238	31.19493956
1321	20	55	6/28/2010	9:50:00	34.04695	-117.276667	474464.4301	3767396.238	31.19493956
1322	20	56	6/30/2010	12:29:00	34.04695	-117.276667	474464.4301	3767396.238	31.19493956
1323	20	57	7/6/2010	17:13:00	34.04695	-117.276667	474464.4301	3767396.238	31.19493956
1324	20	58	7/8/2010	18:39:00	34.04695	-117.276667	474464.4301	3767396.238	31.19493956
1325	20	59	7/15/2010	7:40:00	34.04695	-117.276667	474464.4301	3767396.238	31.19493956
1326	20	60	7/20/2010	9:31:00	34.04695	-117.276667	474464.4301	3767396.238	31.19493956
1327	20	61	7/22/2010	8:30:00	34.04695	-117.276667	474464.4301	3767396.238	31.19493956
1328	20	62	7/27/2010	7:07:00	34.04695	-117.276667	474464.4301	3767396.238	31.19493956
1329	20	63	7/29/2010	8:28:00	34.04695	-117.276667	474464.4301	3767396.238	31.19493956
1330	20	64	8/5/2010	10:12:00	34.047183	-117.276283	474499.942	3767421.977	56.86048616
1331	20	65	8/10/2010	11:03:00	34.0474	-117.275917	474533.7876	3767445.947	94.23864161
1332	20	66	8/12/2010	9:58:00	34.0474	-117.275917	474533.7876	3767445.947	94.23864161
1333	20	67	8/17/2010	9:36:00	34.04705	-117.273967	474713.6627	3767406.656	36.28427782
1334	20	68	8/19/2010	11:06:00	34.047133	-117.273967	474713.6874	3767415.859	30.72262175
1335	20	69	8/24/2010	8:51:00	34.047133	-117.273967	474713.6874	3767415.859	30.72262175
1336	20	70	8/26/2010	9:51:00	34.047133	-117.273967	474713.6874	3767415.859	30.72262175
1337	20	71	8/31/2010	9:10:00	34.047088	-117.276349	474493.822	3767411.46	44.88762317
1338	20	72	9/2/2010	9:21:00	34.047088	-117.276349	474493.822	3767411.46	44.88762317
1339	20	73	9/7/2010	7:40:00	34.047033	-117.27585	474539.8619	3767405.237	70.45035128
1340	20	74	9/9/2010	9:15:00	34.046367	-117.276033	474522.7723	3767331.437	57.25487836
1341	20	75	9/14/2010	7:33:00	34.046367	-117.276033	474522.7723	3767331.437	57.25487836
1342	20	76	9/16/2010	8:42:00	34.046367	-117.276033	474522.7723	3767331.437	57.25487836
1343	20	77	9/21/2010	7:29:00	34.046367	-117.276033	474522.7723	3767331.437	57.25487836
1344	20	78	9/23/2010	8:14:00	34.046367	-117.276033	474522.7723	3767331.437	57.25487836
1345	20	79	9/27/2010	9:49:00	34.046367	-117.276033	474522.7723	3767331.437	57.25487836
1346	20	80	9/29/2010	7:57:00	34.046367	-117.276033	474522.7723	3767331.437	57.25487836
1347	20	81	10/4/2010	0:03:00	34.047	-117.27535	474586.0007	3767401.454	111.3654673
1348	20	Release	10/27/2010	7:48:00	34.046367	-117.27595	474530.433	3767331.417	63.25665489
1349	20	82	11/3/2010	11:15:00	34.046317	-117.276033	474522.7573	3767325.893	61.01786106
1350	20	83	11/12/2010	11:06:00	34.046867	-117.275967	474529.0134	3767386.861	52.66978142
1351	20	84	11/17/2010	8:23:00	34.046867	-117.275967	474529.0134	3767386.861	52.66978142
1352	20	85	12/1/2010	8:10:00	34.046867	-117.275967	474529.0134	3767386.861	52.66978142
1353	20	86	12/8/2010	10:40:00	34.04705	-117.27585	474539.8669	3767407.122	71.44453071
1354	20	87	12/15/2010	8:43:00	34.046725	-117.274691	474646.7428	3767370.799	111.0966685
1355	20	88	12/24/2010	16:28:00	34.046633	-117.2749	474627.4252	3767360.65	132.5161939
1356	20	89	12/30/2010	11:41:00	34.04625	-117.275233	474596.5758	3767318.266	127.5705977
1357	20	90	1/6/2011	8:46:00	34.046367	-117.2754	474581.1969	3767331.28	108.445765
1358	20	91	1/13/2011	9:55:00	34.045633	-117.274317	474680.9375	3767249.626	168.5736528
1359	20	92	1/20/2011	7:33:00	34.045633	-117.274317	474680.9375	3767249.626	168.5736528
1360	20	93	1/27/2011	8:29:00	34.045633	-117.274317	474680.9375	3767249.626	168.5736528
1361	20	94	2/3/2011	10:07:00	34.045633	-117.274317	474680.9375	3767249.626	168.5736528
1362	20	95	2/10/2011	8:44:00	34.045633	-117.274317	474680.9375	3767249.626	168.5736528
1363	20	96	2/17/2011	8:42:00	34.045633	-117.274317	474680.9375	3767249.626	168.5736528
1364	20	97	2/24/2011	8:29:00	34.045633	-117.274317	474680.9375	3767249.626	168.5736528
1365	20	98	3/3/2011	10:31:00	34.045633	-117.274317	474680.9375	3767249.626	168.5736528
1366	20	99	3/10/2011	8:54:00	34.045483	-117.27445	474668.6172	3767233.027	188.7878714
1367	20	100	3/15/2011	8:39:00	34.046733	-117.27475	474641.2996	3767371.701	114.7795005
1368	20	101	3/17/2011	10:29:00	34.046696	-117.274752	474641.104	3767367.598	117.5343562
1369	20	102	3/22/2011	9:14:00	34.04675	-117.274817	474635.1207	3767373.602	118.4911175
1370	20	103	3/24/2011	11:54:00	34.046667	-117.274717	474644.3258	3767364.374	116.9289176
1371	20	104	3/29/2011	9:02:00	34.0467	-117.274667	474648.9505	3767368.021	111.0392621
1372	20	105	3/31/2011	10:50:00	34.045967	-117.2756	474562.6179	3767286.978	106.5863154
1373	20	106	4/5/2011	8:51:00	34.0467	-117.274717	474644.3356	3767368.033	114.6814881
1374	20	107	4/12/2011	8:43:00	34.0465	-117.273817	474727.3441	3767345.635	82.68806776
1375	20	108	4/14/2011	11:25:00	34.046967	-117.273733	474735.2357	3767397.395	31.998785
1376	20	109	4/19/2011	9:19:00	34.045783	-117.27515	474604.0973	3767266.464	138.1293912
1377	20	110	4/21/2011	10:34:00	34.046233	-117.273817	474727.2649	3767316.03	92.41756111
1378	20	111	4/26/2011	8:56:00	34.0469	-117.27445	474669.0385	3767390.143	81.68946914
1379	20	112	4/28/2011	8:29:00	34.046667	-117.274833	474633.6192	3767364.403	125.3461181
1380	20	114	5/10/2011	8:20:00	34.047033	-117.274	474710.6119	3767404.779	39.85136048
1381	20	115	5/19/2011	8:24:00	34.047463	-117.275487	474573.4941	3767452.825	105.6643322
1382	20	116	6/8/2011	8:13:00	34.047133	-117.27625	474502.9729	3767416.425	52.99006387
1383	20	117	6/15/2011	13:08:00	34.047017	-117.2768	474452.1746	3767403.7	37.99619172
1384	20	Relocate	6/15/2011	13:24:00	34.047033	-117.274617	474653.6644	3767404.931	84.4157851
1385	20	118	6/22/2011	7:23:00	34.047013	-117.27641	474488.1694	3767403.159	35.32040516
1386	20	119	6/28/2011	7:38:00	34.047013	-117.27641	474488.1694	3767403.159	35.32040516
1387	20	120	7/5/2011	8:57:00	34.047013	-117.27641	474488.1694	3767403.159	35.32040516
1388	20	121	7/13/2011	9:36:00	34.047667	-117.277217	474413.8819	3767475.876	43.08513401
1389	20	122	7/26/2011	8:22:00	34.04835	-117.276983	474435.6842	3767551.548	18.61674245
1390	20	Last	8/5/2011	8:48:00	34.048083	-117.276817	474450.9253	3767521.902	47.16354558
1391	20	113	5/3/2011 0:00	12:05:00	34.044783	-117.274467	474666.8399	3767155.416	179.9960834
1392	21	Capture	3/20/2010	14:42:00	34.041365	-117.268012	475261.6423	3766774.851	4.133253411
1393	21	Release	3/24/2010	10:50:00	34.0457	-117.275	474617.9174	3767257.224	149.9651323
1394	21	1	4/7/2010	12:20:00	34.045967	-117.27525	474594.9223	3767286.891	135.6590416
1395	21	2	4/9/2010	11:50:00	34.045967	-117.275217	474597.9682	3767286.883	138.47423
1396	21	3	4/13/2010	10:19:00	34.045967	-117.275217	474597.9682	3767286.883	138.47423
1397	21	4	4/15/2010	12:53:00	34.045967	-117.275217	474597.9682	3767286.883	138.47423
1398	21	5	4/20/2010	9:35:00	34.046517	-117.275417	474579.6726	3767347.916	102.3578275
1399	21	6	4/22/2010	13:19:00	34.04665	-117.2751	474608.9707	3767362.584	129.6325264
1400	21	7	4/27/2010	10:25:00	34.046617	-117.275133	474605.915	3767358.934	126.8156981
1401	21	8	4/29/2010	9:43:00	34.046617	-117.275133	474605.915	3767358.934	126.8156981
1402	21	9	5/4/2010	10:59:00	34.046867	-117.275033	474615.2193	3767386.629	126.1084388
1403	21	10	5/6/2010	12:00:00	34.046533	-117.274683	474647.424	3767349.508	123.7146494
1404	21	11	5/11/2010	12:58:00	34.047483	-117.274317	474681.4874	3767454.753	33.61711577
1405	21	12	5/13/2010	11:20:00	34.046933	-117.27375	474733.6565	3767393.629	36.03356671
1406	21	13	5/25/2010	10:17:00	34.046883	-117.2736	474747.4863	3767388.048	39.54201131
1407	21	14	8/10/2010	8:06:00	34.046927	-117.273662	474741.7769	3767392.942	35.60011549
1408	21	15	8/12/2010	10:24:00	34.04685	-117.2744	474673.6385	3767384.587	81.43902048
1409	21	16	8/17/2010	7:26:00	34.04685	-117.2744	474673.6385	3767384.587	81.43902048
1410	21	17	8/19/2010	10:53:00	34.04685	-117.2744	474673.6385	3767384.587	81.43902048
1411	21	18	8/26/2010	9:37:00	34.04685	-117.2744	474673.6385	3767384.587	81.43902048
1412	21	19	8/31/2010	8:28:00	34.04685	-117.2744	474673.6385	3767384.587	81.43902048
1413	21	20	9/2/2010	9:00:00	34.04685	-117.2744	474673.6385	3767384.587	81.43902048
1414	21	21	9/7/2010	7:20:00	34.04685	-117.2744	474673.6385	3767384.587	81.43902048
1415	21	22	9/9/2010	9:28:00	34.047	-117.274367	474676.7289	3767401.21	68.67527037
1416	21	23	9/23/2010	7:45:00	34.048283	-117.2724	474858.6565	3767542.984	21.98310869
1417	21	Relocate	9/23/2010	7:54:00	34.04605	-117.273933	474716.504	3767295.768	112.1646174
1418	21	24	9/27/2010	10:34:00	34.045283	-117.272817	474819.2823	3767210.448	139.2701294
1419	21	25	9/29/2010	8:49:00	34.045283	-117.272817	474819.2823	3767210.448	139.2701294
1420	21	26	10/4/2010	10:21:00	34.046767	-117.273717	474736.6531	3767375.215	53.64914453
1421	21	27	10/11/2010	8:31:00	34.046767	-117.273717	474736.6531	3767375.215	53.64914453
1422	21	28	10/18/2010	8:19:00	34.046	-117.274909	474626.4059	3767290.465	166.3391655
1423	21	29	10/27/2010	8:25:00	34.04605	-117.274867	474630.2974	3767295.999	167.5097403
1424	21	30	11/3/2010	11:01:00	34.04605	-117.274867	474630.2974	3767295.999	167.5097403
1425	21	31	11/12/2010	10:46:00	34.04605	-117.274867	474630.2974	3767295.999	167.5097403
1426	21	32	11/17/2010	8:31:00	34.04605	-117.274867	474630.2974	3767295.999	167.5097403
1427	21	33	12/1/2010	7:38:00	34.04605	-117.274867	474630.2974	3767295.999	167.5097403
1428	21	34	12/8/2010	10:49:00	34.04605	-117.274867	474630.2974	3767295.999	167.5097403
1429	21	35	12/15/2010	8:25:00	34.04605	-117.274867	474630.2974	3767295.999	167.5097403
1430	21	36	12/30/2010	11:26:00	34.04605	-117.274867	474630.2974	3767295.999	167.5097403
1431	21	37	1/6/2011	8:34:00	34.045917	-117.274783	474638.0108	3767281.231	174.6460266
1432	21	38	1/13/2011	10:31:00	34.04685	-117.27435	474678.2534	3767384.574	77.9369655
1433	21	39	1/20/2011	7:17:00	34.04685	-117.273667	474741.2926	3767384.406	44.14603052
1434	21	40	1/27/2011	8:20:00	34.04685	-117.273667	474741.2926	3767384.406	44.14603052
1435	21	41	1/28/2011	12:16:00	34.04685	-117.273667	474741.2926	3767384.406	44.14603052
1436	21	42	2/3/2011	10:32:00	34.046632	-117.273774	474731.3521	3767360.26	69.19440407
1437	21	43	2/10/2011	8:19:00	34.046632	-117.273774	474731.3521	3767360.26	69.19440407
1438	21	44	2/17/2011	8:19:00	34.046632	-117.273774	474731.3521	3767360.26	69.19440407
1439	21	45	2/24/2011	8:15:00	34.046632	-117.273774	474731.3521	3767360.26	69.19440407
1440	21	46	3/3/2011	10:02:00	34.046632	-117.273774	474731.3521	3767360.26	69.19440407
1441	21	47	3/10/2011	8:36:00	34.046583	-117.273867	474722.7539	3767354.85	76.31102914
1442	21	Release	3/17/2011	8:19:00	34.046583	-117.273867	474722.7539	3767354.85	76.31102914
1443	21	48	3/22/2011	8:42:00	34.046237	-117.273928	474717.021	3767316.501	101.3777314
1444	21	49	3/24/2011	12:25:00	34.046317	-117.27395	474715.0142	3767325.377	99.83793446
1445	21	50	3/29/2011	20:37:00	34.046317	-117.27395	474715.0142	3767325.377	99.83793446
1446	21	51	3/31/2011	11:10:00	34.046317	-117.27395	474715.0142	3767325.377	99.83793446
1447	21	52	4/5/2011	8:29:00	34.046091	-117.274058	474704.9789	3767300.345	119.505634
1448	21	53	4/12/2011	8:35:00	34.046798	-117.273791	474729.8323	3767378.67	51.4736467
1449	21	54	4/14/2011	11:19:00	34.046933	-117.273667	474741.3172	3767393.609	34.9472931
1450	21	55	4/19/2011	8:35:00	34.047317	-117.27265	474835.2971	3767435.936	4.196670503
1451	21	Relocate	4/19/2011	8:45:00	34.046617	-117.273833	474725.9021	3767358.612	71.88898366
1452	21	56	4/21/2011	11:30:00	34.0465	-117.273583	474748.9418	3767345.577	61.50919823
1453	21	57	4/26/2011	8:26:00	34.0465	-117.273583	474748.9418	3767345.577	61.50919823
1454	21	58	4/28/2011	12:36:00	34.046799	-117.273796	474729.3711	3767378.783	51.48086518
1455	21	59	5/3/2011	12:30:00	34.046799	-117.273796	474729.3711	3767378.783	51.48086518
1456	21	60	5/10/2011	8:44:00	34.04745	-117.272067	474889.1455	3767450.539	1.488390563
1457	21	Relocate	5/10/2011	8:57:00	34.045883	-117.274583	474656.4604	3767277.412	173.0662304
1458	21	61	5/19/2011	8:52:00	34.045733	-117.274	474710.2259	3767260.636	139.5874692
1459	21	62	6/8/2011	7:43:00	34.045634	-117.274052	474705.397	3767249.671	150.8198487
1460	21	63	6/15/2011	12:38:00	34.045733	-117.274083	474702.5651	3767260.656	145.0894379
1461	21	64	6/22/2011	8:36:00	34.047139	-117.272741	474826.8455	3767416.222	18.43689061
1462	21	Relocate	6/22/2011	8:42:00	34.045673	-117.274718	474643.9376	3767254.161	175.3750716
1463	21	65	6/28/2011	8:46:00	34.047383	-117.272667	474833.7476	3767443.258	0.960724368
1464	21	Relocate	6/28/2011	8:55:00	34.045867	-117.2746	474654.8866	3767275.642	175.292561
1465	21	66	6/30/2011	9:58:00	34.045933	-117.274033	474707.2395	3767282.82	127.253793
1466	21	67	7/5/2011	8:25:00	34.046717	-117.272483	474850.5336	3767369.367	7.069165125
1467	21	Relocate	7/5/2011	8:35:00	34.045817	-117.27465	474650.2568	3767270.11	182.0219941
1468	21	68	7/7/2011	7:57:00	34.046727	-117.273084	474795.0657	3767370.624	17.80718687
1469	21	Relocate	7/7/2011	8:04:00	34.045894	-117.274539	474660.5248	3767278.621	168.9162259
1470	21	69	7/13/2011	9:00:00	34.047104	-117.272526	474846.6791	3767412.288	6.384017557
1471	21	Relocate	7/13/2011	9:09:00	34.045822	-117.275126	474606.3241	3767270.783	141.3327197
1472	21	70	7/26/2011	7:30:00	34.047517	-117.272567	474843.0168	3767458.091	16.95047985
1473	21	Relocate	7/26/2011	7:39:00	34.046183	-117.27525	474594.9867	3767310.841	129.274998
1474	21	71	8/5/2011	7:10:00	34.047475	-117.272685	474832.1134	3767453.463	7.665410976
1475	21	Relocate	8/5/2011	7:16:00	34.046291	-117.275412	474580.0667	3767322.856	110.6210029
1476	21	72	8/12/2011	7:45:00	34.046107	-117.274926	474624.8687	3767302.334	159.8995143
1477	21	73	8/19/2011	8:29:00	34.046107	-117.274926	474624.8687	3767302.334	159.8995143
1478	21	74	8/28/2011	7:47:00	34.048831	-117.27243	474856.0494	3767603.753	35.54151771
1479	21	Relocate	8/28/2011	7:56:00	34.045833	-117.27448	474665.9523	3767271.842	167.6088951
1480	21	75	9/6/2011	7:26:00	34.047516	-117.272579	474841.909	3767457.983	16.25410309
1481	21	Relocate	9/6/2011	7:34:00	34.0458	-117.274517	474662.5274	3767268.192	172.4410294
1482	21	76	9/13/2011	8:21:00	34.048564	-117.271632	474929.6225	3767573.952	8.814410604
1483	21	77	9/19/2011	8:07:00	34.048564	-117.271632	474929.6225	3767573.952	8.814410604
1484	21	78	9/26/2011	8:37:00	34.048601	-117.271708	474922.6189	3767578.074	2.678584905
1485	21	Relocate	9/26/2011	8:47:00	34.045817	-117.2745	474664.1016	3767270.073	170.1119275
1486	21	79	10/3/2011	8:17:00	34.047	-117.272717	474829.0196	3767400.803	3.202843183
1487	21	80	10/11/2011	8:23:00	34.046948	-117.272797	474821.6204	3767395.057	2.718347566
1488	21	Final_Release	10/12/2011	8:09:00	34.045327	-117.274707	474644.8499	3767215.794	166.7988888
1489	22	Capture	3/20/2010	14:42:00	34.041365	-117.268012	475261.6423	3766774.851	4.133253411
1490	22	Release	3/24/2010	10:50:00	34.0457	-117.275	474617.9174	3767257.224	149.9651323
1491	22	1	4/7/2010	0:38:00	34.046483	-117.27455	474659.6847	3767343.931	118.4654975
1492	22	2	4/9/2010	12:07:00	34.047233	-117.273267	474778.325	3767426.774	18.49974882
1493	22	3	4/9/2010	18:06:00	34.047913	-117.273086	474795.232	3767502.127	18.8431951
1494	22	4	4/11/2010	11:53:00	34.048573	-117.274247	474688.272	3767575.594	5.112694857
1495	22	Relocate	4/11/2010	12:32:00	34.045711	-117.274488	474665.1776	3767258.317	175.6867609
1496	22	5	4/13/2010	10:10:00	34.045633	-117.2744	474673.2767	3767249.647	174.4461095
1497	22	6	4/15/2010	12:53:00	34.045633	-117.2744	474673.2767	3767249.647	174.4461095
1498	22	7	4/19/2010	16:09:00	34.045486	-117.274276	474684.6781	3767233.317	176.9748575
1499	22	8	4/20/2010	9:52:00	34.045486	-117.274276	474684.6781	3767233.317	176.9748575
1500	22	9	4/22/2010	12:35:00	34.045486	-117.274276	474684.6781	3767233.317	176.9748575
1501	22	10	4/27/2010	10:49:00	34.04575	-117.275233	474596.4267	3767262.826	129.8426538
1502	22	11	4/29/2010	10:17:00	34.0455	-117.274233	474688.6511	3767234.858	173.0976523
1503	22	12	5/4/2010	9:54:00	34.045483	-117.273933	474716.3358	3767232.899	156.7289377
1504	22	13	5/6/2010	12:50:00	34.0451	-117.272733	474826.9814	3767190.137	159.1486673
1505	22	14	5/11/2010	11:56:00	34.045133	-117.272833	474817.7612	3767193.82	155.9670468
1506	22	15	5/13/2010	11:09:00	34.045133	-117.272833	474817.7612	3767193.82	155.9670468
1507	22	16	5/18/2010	11:38:00	34.044667	-117.27235	474862.2043	3767142.032	209.5706039
1508	22	17	5/20/2010	13:20:00	34.044733	-117.27225	474871.4537	3767149.325	204.0019978
1509	22	18	5/25/2010	11:46:00	34.044617	-117.2718	474912.9545	3767136.353	224.9832907
1510	22	19	5/27/2010	15:56:00	34.044683	-117.271833	474909.928	3767143.679	220.2568324
1511	22	20	6/1/2010	10:16:00	34.044567	-117.271883	474905.2788	3767130.829	230.7534115
1512	22	21	6/3/2010	11:46:00	34.044617	-117.271833	474909.9086	3767136.361	227.0949972
1513	22	22	6/10/2010	10:37:00	34.044617	-117.271833	474909.9086	3767136.361	227.0949972
1514	22	23	6/17/2010	11:21:00	34.04465	-117.271783	474914.5333	3767140.008	221.4100371
1515	22	24	6/23/2010	8:23:00	34.044517	-117.27135	474954.46	3767125.155	188.2726104
1516	22	25	6/28/2010	10:51:00	34.044677	-117.268788	475190.9793	3767142.271	3.707517989
1517	22	Relocate	6/28/2010	11:14:00	34.044667	-117.27025	475056.034	3767141.518	88.37544172
1518	22	26	6/30/2010	9:55:00	34.043817	-117.268983	475172.7302	3767046.962	2.179937807
1519	22	Relocate	6/30/2010	10:11:00	34.044319	-117.270134	475066.6389	3767102.904	75.85783465
1520	22	27	7/7/2010	18:29:00	34.042801	-117.267103	475345.9616	3766933.855	3.617842559
1521	22	Relocate	7/7/2010	18:41:00	34.044733	-117.270367	475045.2542	3767148.864	99.87731346
1522	22	28	7/8/2010	16:43:00	34.044517	-117.270667	475017.5009	3767124.988	125.2677823
1523	22	29	7/15/2010	8:48:00	34.044483	-117.26945	475129.8201	3767120.921	12.91044698
1524	22	30	7/20/2010	7:46:00	34.045033	-117.269332	475140.872	3767181.876	12.12616135
1525	22	31	7/22/2010	9:21:00	34.045267	-117.2694	475134.664	3767207.839	13.19434761
1526	22	Relocate	7/22/2010	9:32:00	34.04465	-117.270283	475052.9831	3767139.641	91.25084299
1527	22	32	7/27/2010	8:43:00	34.044167	-117.269033	475168.2171	3767085.782	5.731855781
1528	22	33	7/29/2010	9:41:00	34.043629	-117.268502	475217.0722	3767026.001	6.080551147
1529	22	Relocate	7/29/2010	9:49:00	34.044033	-117.270217	475058.8942	3767071.212	86.47083978
1530	22	34	8/5/2010	8:48:00	34.04476	-117.268927	475178.1738	3767151.508	4.615044052
1531	22	Relocate	8/5/2010	8:54:00	34.044583	-117.270183	475062.1935	3767132.188	81.4552851
1532	22	35	8/10/2010	9:22:00	34.0448	-117.2693	475143.7576	3767156.034	1.711154375
1533	22	36	8/12/2010	8:10:00	34.04475	-117.269033	475168.3871	3767150.425	5.286359143
1534	22	Relocate	8/12/2010	8:15:00	34.044642	-117.270308	475050.6732	3767138.76	93.49352723
1535	22	37	8/17/2010	10:25:00	34.04475	-117.269117	475160.6339	3767150.445	2.897144007
1536	22	38	8/19/2010	8:10:00	34.04475	-117.269117	475160.6339	3767150.445	2.897144007
1537	22	39	8/24/2010	6:58:00	34.04475	-117.269117	475160.6339	3767150.445	2.897144007
1538	22	40	8/26/2010	7:00:00	34.044733	-117.269333	475140.6922	3767148.613	7.521950837
1539	22	Relocate	8/26/2010	7:05:00	34.044643	-117.270267	475054.4578	3767138.861	89.72391331
1540	22	41	8/31/2010	11:19:00	34.044267	-117.268867	475183.5681	3767096.83	5.875248735
1541	22	Relocate	8/31/2010	11:23:00	34.044367	-117.270133	475066.7452	3767108.226	75.50843594
1542	22	42	9/2/2010	8:19:00	34.0445	-117.270217	475059.031	3767122.993	83.69022939
1543	22	43	9/7/2010	9:26:00	34.0454	-117.269533	475122.427	3767222.618	2.914947454
1544	22	44	9/9/2010	7:30:00	34.0454	-117.269533	475122.427	3767222.618	2.914947454
1545	22	45	9/14/2010	9:46:00	34.044783	-117.268983	475173.0117	3767154.072	2.609811088
1546	22	Relocate	9/14/2010	9:51:00	34.0446	-117.270217	475059.0602	3767134.081	84.85734285
1547	22	46	9/16/2010	9:37:00	34.044167	-117.269467	475128.1588	3767085.888	15.93839661
1548	22	47	9/21/2010	9:00:00	34.044183	-117.269067	475165.0836	3767087.565	2.131507176
1549	22	48	9/23/2010	9:41:00	34.044217	-117.268983	475172.8467	3767091.314	2.494557906
1550	22	49	9/27/2010	8:48:00	34.044067	-117.269383	475135.8828	3767074.779	18.80375833
1551	22	50	9/29/2010	9:12:00	34.043917	-117.269367	475137.3159	3767058.144	28.21677659
1552	22	51	10/4/2010	8:59:00	34.045683	-117.269483	475127.1246	3767253.985	10.52005901
1553	22	Relocate	10/4/2010	9:04:00	34.044767	-117.270317	475049.8792	3767152.622	95.10030439
1554	22	52	10/11/2010	10:10:00	34.045283	-117.269533	475122.3928	3767209.645	10.56686798
1555	22	53	10/13/2010	9:57:00	34.045544	-117.269085	475163.819	3767238.476	7.896207198
1556	22	Relocate	10/13/2010	10:01:00	34.04475	-117.270367	475045.2592	3767150.749	99.77782379
1557	22	54	10/18/2010	9:52:00	34.045183	-117.269167	475156.1452	3767198.468	2.565000683
1558	22	55	10/27/2010	9:26:00	34.045132	-117.26917	475155.8534	3767192.814	3.153739345
1559	22	56	11/3/2010	8:43:00	34.0456	-117.2691	475162.4508	3767244.689	1.776632886
1560	22	57	11/12/2010	9:05:00	34.045447	-117.26909	475163.3292	3767227.722	3.230488301
1561	22	58	11/19/2010	9:29:00	34.045445	-117.269122	475160.375	3767227.508	0.354518984
1562	22	59	12/1/2010	9:35:00	34.045583	-117.269133	475159.4	3767242.812	3.565408549
1563	22	60	12/8/2010	8:35:00	34.045583	-117.269133	475159.4	3767242.812	3.565408549
1564	22	61	12/15/2010	10:38:00	34.045583	-117.269133	475159.4	3767242.812	3.565408549
1565	22	62	12/30/2010	12:25:00	34.045583	-117.269133	475159.4	3767242.812	3.565408549
1566	22	63	1/6/2011	9:41:00	34.045583	-117.269133	475159.4	3767242.812	3.565408549
1567	22	64	1/13/2011	8:21:00	34.045583	-117.269133	475159.4	3767242.812	3.565408549
1568	22	65	1/20/2011	9:00:00	34.045583	-117.269133	475159.4	3767242.812	3.565408549
1569	22	66	1/27/2011	9:44:00	34.045583	-117.269133	475159.4	3767242.812	3.565408549
1570	22	67	2/3/2011	8:33:00	34.045583	-117.269133	475159.4	3767242.812	3.565408549
1571	22	68	2/10/2011	10:08:00	34.045583	-117.269133	475159.4	3767242.812	3.565408549
1572	22	69	2/17/2011	9:38:00	34.045583	-117.269133	475159.4	3767242.812	3.565408549
1573	22	70	2/24/2011	9:12:00	34.045583	-117.269133	475159.4	3767242.812	3.565408549
1574	22	71	3/3/2011	8:26:00	34.045583	-117.269133	475159.4	3767242.812	3.565408549
1575	22	72	3/10/2011	9:58:00	34.045583	-117.269133	475159.4	3767242.812	3.565408549
1576	22	73	3/15/2011	10:06:00	34.045583	-117.269133	475159.4	3767242.812	3.565408549
1577	22	Release	3/17/2011	8:26:00	34.044565	-117.270179	475062.5574	3767130.191	80.80618791
1578	22	74	3/22/2011	12:01:00	34.04405	-117.269383	475135.8779	3767072.894	20.57138866
1579	22	75	3/24/2011	9:44:00	34.04405	-117.269383	475135.8779	3767072.894	20.57138866
1580	22	76	3/29/2011	10:51:00	34.0442	-117.269483	475126.6916	3767089.551	16.2977209
1581	22	77	3/31/2011	8:33:00	34.0442	-117.269483	475126.6916	3767089.551	16.2977209
1582	22	78	4/5/2011	11:05:00	34.044	-117.269383	475135.8633	3767067.35	25.86648209
1583	22	79	4/12/2011	11:29:00	34.04405	-117.269433	475131.2628	3767072.907	22.52759823
1584	23	Capture	4/7/2010	11:36:00	34.044289	-117.27137	474952.547	3767099.879	189.9227395
1585	23	Release	4/8/2010	18:18:00	34.044317	-117.2713	474959.0162	3767102.967	183.3333154
1586	23	1	4/9/2010	10:30:00	34.04445	-117.271283	474960.6244	3767117.709	181.8325181
1587	23	2	4/13/2010	11:44:00	34.04425	-117.270283	475052.866	3767095.289	89.94349163
1588	23	3	4/15/2010	11:18:00	34.043667	-117.27085	475000.3606	3767030.785	155.1097236
1589	23	4	4/20/2010	10:59:00	34.04305565	-117.2708639	474998.8955	3766963.002	187.4521885
1590	23	5	4/22/2010	14:40:00	34.04305	-117.270867	474998.6104	3766962.377	187.8636462
1591	23	6	4/27/2010	12:25:00	34.04305	-117.2701	475069.4058	3766962.19	119.7349215
1592	23	7	4/29/2010	11:39:00	34.0433	-117.270133	475066.433	3766989.917	116.3792296
1593	23	8	5/4/2010	12:42:00	34.044883	-117.2706	475023.7923	3767165.553	115.2864849
1594	23	9	5/6/2010	10:54:00	34.044733	-117.27045	475037.5933	3767148.885	107.5244295
1595	23	10	5/11/2010	11:23:00	34.043467	-117.27085	475000.3019	3767008.609	165.2118757
1596	23	11	5/13/2010	10:14:00	34.043517	-117.270883	474997.2707	3767014.161	165.1348631
1597	23	12	5/18/2010	12:46:00	34.043517	-117.270883	474997.2707	3767014.161	165.1348631
1598	23	13	5/20/2010	12:48:00	34.043517	-117.270883	474997.2707	3767014.161	165.1348631
1599	23	14	5/25/2010	12:16:00	34.043517	-117.270883	474997.2707	3767014.161	165.1348631
1600	23	15	5/27/2010	16:27:00	34.043517	-117.270883	474997.2707	3767014.161	165.1348631
1601	23	16	6/1/2010	11:04:00	34.043517	-117.270883	474997.2707	3767014.161	165.1348631
1602	23	17	6/3/2010	10:46:00	34.043333	-117.270667	475017.1537	3766993.707	158.9001126
1603	23	18	6/10/2010	12:20:00	34.042817	-117.271063	474980.4509	3766936.59	212.1935956
1604	23	19	6/17/2010	12:19:00	34.0428	-117.27115	474972.4156	3766934.726	220.4113163
1605	23	20	6/23/2010	9:07:00	34.04265	-117.27085	475000.0622	3766918.021	200.2352384
1606	23	21	6/28/2010	11:50:00	34.042067	-117.270417	475039.8582	3766853.273	196.5066073
1607	23	22	6/30/2010	8:33:00	34.042333	-117.270417	475039.9361	3766882.766	182.4143469
1608	23	23	7/6/2010	18:44:00	34.04265	-117.270833	475001.6313	3766918.017	198.7785738
1609	23	24	7/8/2010	17:05:00	34.04265	-117.270833	475001.6313	3766918.017	198.7785738
1610	23	25	7/15/2010	9:49:00	34.04265	-117.270833	475001.6313	3766918.017	198.7785738
1611	23	26	7/20/2010	7:27:00	34.042785	-117.270959	474990.0409	3766933.016	204.2904209
1612	23	27	7/22/2010	10:34:00	34.042785	-117.270959	474990.0409	3766933.016	204.2904209
1613	23	28	7/27/2010	9:37:00	34.042785	-117.270959	474990.0409	3766933.016	204.2904209
1614	23	Release	8/23/2010	9:18:00	34.042785	-117.270959	474990.0409	3766933.016	204.2904209
1615	23	29	8/24/2010	8:17:00	34.042785	-117.270959	474990.0409	3766933.016	204.2904209
1616	23	30	8/26/2010	8:02:00	34.042785	-117.270959	474990.0409	3766933.016	204.2904209
1617	23	31	8/31/2010	0:29:00	34.042933	-117.270933	474992.4842	3766949.42	196.9481526
1618	23	32	9/2/2010	6:59:00	34.04285	-117.27095	474990.8907	3766940.221	201.142365
1619	23	33	9/7/2010	9:55:00	34.043017	-117.270617	475021.6762	3766958.657	166.3494877
1620	23	34	9/9/2010	8:09:00	34.043517	-117.270867	474998.7475	3767014.157	163.8371577
1621	23	35	9/14/2010	9:02:00	34.043267	-117.2713	474958.7076	3766986.543	212.2624827
1622	23	Release	10/26/2010	9:20:00	34.042963	-117.271023	474984.1858	3766952.768	204.1078321
1623	23	36	10/27/2010	10:00:00	34.042783	-117.271217	474966.2264	3766932.857	226.8753409
1624	23	37	11/3/2010	9:18:00	34.04285	-117.271117	474975.4763	3766940.262	215.8382072
1625	23	38	11/12/2010	9:42:00	34.04285	-117.271117	474975.4763	3766940.262	215.8382072
1626	23	39	11/17/2010	7:16:00	34.04285	-117.271117	474975.4763	3766940.262	215.8382072
1627	23	40	12/1/2010	9:12:00	34.04285	-117.271117	474975.4763	3766940.262	215.8382072
1628	23	41	12/8/2010	9:13:00	34.04285	-117.271117	474975.4763	3766940.262	215.8382072
1629	23	42	12/15/2010	10:08:00	34.042564	-117.270184	475061.5102	3766908.323	150.0403458
1630	23	43	12/30/2010	12:55:00	34.042564	-117.270184	475061.5102	3766908.323	150.0403458
1631	23	44	1/6/2011	10:11:00	34.042564	-117.270184	475061.5102	3766908.323	150.0403458
1632	23	45	1/13/2011	8:51:00	34.042564	-117.270184	475061.5102	3766908.323	150.0403458
1633	23	46	1/20/2011	9:29:00	34.042564	-117.270184	475061.5102	3766908.323	150.0403458
1634	23	47	1/27/2011	10:12:00	34.042564	-117.270184	475061.5102	3766908.323	150.0403458
1635	23	48	2/3/2011	9:02:00	34.042564	-117.270184	475061.5102	3766908.323	150.0403458
1636	23	49	2/10/2011	10:43:00	34.042564	-117.270184	475061.5102	3766908.323	150.0403458
1637	23	50	2/17/2011	10:05:00	34.042564	-117.270184	475061.5102	3766908.323	150.0403458
1638	23	51	2/24/2011	9:36:00	34.042564	-117.270184	475061.5102	3766908.323	150.0403458
1639	23	52	3/3/2011	8:54:00	34.042564	-117.270184	475061.5102	3766908.323	150.0403458
1640	23	53	3/10/2011	11:03:00	34.042564	-117.270184	475061.5102	3766908.323	150.0403458
1641	23	54	3/15/2011	11:07:00	34.042983	-117.270633	475020.1894	3766954.891	168.8091067
1642	23	55	3/17/2011	8:56:00	34.04305	-117.271033	474983.2884	3766962.417	202.588602
1643	23	56	3/22/2011	10:37:00	34.043433	-117.27085	475000.2919	3767004.839	167.1613232
1644	23	57	3/24/2011	10:43:00	34.043467	-117.270883	474997.256	3767008.617	167.8413651
1645	23	58	3/29/2011	10:41:00	34.0434	-117.270483	475034.1568	3767001.091	140.3741427
1646	23	59	3/31/2011	9:41:00	34.042333	-117.270383	475043.0744	3766882.758	179.9118106
1647	23	60	4/5/2011	10:19:00	34.043717	-117.270367	475044.9566	3767036.211	112.7346952
1648	23	61	4/12/2011	10:51:00	34.043433	-117.2711	474977.2166	3767004.9	187.1888423
1649	23	62	4/14/2011	8:56:00	34.043433	-117.2711	474977.2166	3767004.9	187.1888423
1650	23	63	4/19/2011	11:19:00	34.042117	-117.270517	475030.6426	3766858.841	203.8982118
1651	23	64	4/21/2011	9:25:00	34.042117	-117.270517	475030.6426	3766858.841	203.8982118
1652	23	65	4/26/2011	10:48:00	34.042867	-117.270883	474997.0799	3766942.09	194.6787361
1653	23	66	4/28/2011	11:27:00	34.042867	-117.270883	474997.0799	3766942.09	194.6787361
1654	23	67	5/3/2011	9:23:00	34.0433	-117.270167	475063.2947	3766989.926	119.1664719
1655	23	68	5/10/2011	17:31:00	34.042217	-117.270433	475038.4253	3766869.908	191.5365869
1656	23	69	5/19/2011	17:25:00	34.04295	-117.270167	475063.1923	3766951.118	129.5751886
1657	23	70	6/8/2011	10:24:00	34.042833	-117.270433	475038.6058	3766938.21	157.0338606
1658	23	71	6/15/2011	11:01:00	34.043383	-117.269683	475107.9928	3766999.011	74.13633837
1659	23	72	6/22/2011	11:40:00	34.043519	-117.269831	475094.372	3767014.126	80.14464339
1660	23	73	6/30/2011	8:25:00	34.043383	-117.269683	475107.9928	3766999.011	74.13633837
1661	23	74	7/7/2011	10:16:00	34.04245	-117.270667	475016.8948	3766895.8	194.6231902
1662	23	75	7/15/2011	9:09:00	34.042917	-117.27025	475055.5216	3766947.479	138.003772
1663	23	76	7/26/2011	19:13:00	34.042691	-117.270156	475064.1318	3766922.398	140.4128319
1664	23	77	8/4/2011	19:39:00	34.043213	-117.270235	475056.9928	3766980.296	127.0976297
1665	23	78	8/14/2011	10:00:00	34.042782	-117.271024	474984.0404	3766932.699	210.0474676
1666	23	Final_Release	9/7/2011	7:52:00	34.04278254	-117.2705696	475025.9844	3766932.648	170.7976331
1667	24	Capture	4/13/2010	10:53:00	34.045517	-117.27265	474834.7654	3767236.353	112.955269
1668	24	Release	5/11/2010	10:15:00	34.045683	-117.272971	474805.1865	3767254.838	97.81980131
1669	24	1	5/13/2010	11:00:00	34.045633	-117.27265	474834.7997	3767249.215	100.1034813
1670	24	2	5/18/2010	11:49:00	34.045483	-117.272433	474854.7842	3767232.53	119.1441886
1671	24	3	5/20/2010	13:35:00	34.0455	-117.2723	474867.065	3767234.382	120.4403723
1672	24	4	5/25/2010	11:17:00	34.04595	-117.2729	474811.8187	3767284.425	67.54232624
1673	24	5	5/27/2010	15:27:00	34.046	-117.27295	474807.2185	3767289.981	63.78560151
1674	24	6	6/1/2010	11:52:00	34.046117	-117.273267	474777.9946	3767303.032	64.2645018
1675	24	7	6/3/2010	12:33:00	34.046567	-117.273833	474725.8873	3767353.068	77.29510716
1676	24	8	6/10/2010	9:02:00	34.046567	-117.273833	474725.8873	3767353.068	77.29510716
1677	24	9	6/17/2010	10:54:00	34.046567	-117.273833	474725.8873	3767353.068	77.29510716
1678	24	10	6/23/2010	10:03:00	34.046567	-117.273833	474725.8873	3767353.068	77.29510716
1679	24	11	6/28/2010	8:58:00	34.046567	-117.273833	474725.8873	3767353.068	77.29510716
1680	24	12	6/30/2010	10:54:00	34.046033	-117.273233	474781.1079	3767293.71	71.30851903
1681	24	13	7/6/2010	19:43:00	34.046317	-117.274083	474702.7386	3767325.41	110.5621402
1682	24	14	7/8/2010	17:51:00	34.0467	-117.27415	474696.6684	3767367.893	76.07763139
1683	24	15	7/15/2010	8:18:00	34.046367	-117.274283	474684.2938	3767331.003	113.6345464
1684	24	16	7/20/2010	8:57:00	34.046383	-117.274233	474688.9135	3767332.765	109.7941339
1685	24	17	7/22/2010	8:15:00	34.0464	-117.274167	474695.0102	3767334.633	105.2752365
1686	24	18	7/27/2010	8:09:00	34.04645	-117.2737	474738.1282	3767340.062	73.34418881
1687	24	19	7/29/2010	8:40:00	34.046	-117.273217	474782.5749	3767290.047	74.1629726
1688	24	20	8/5/2010	9:09:00	34.046	-117.273217	474782.5749	3767290.047	74.1629726
1689	24	21	8/10/2010	9:38:00	34.046	-117.273217	474782.5749	3767290.047	74.1629726
1690	24	22	8/12/2010	9:14:00	34.046	-117.273217	474782.5749	3767290.047	74.1629726
1691	24	23	8/17/2010	10:02:00	34.046	-117.2729	474811.8335	3767289.969	62.23727128
1692	24	24	8/19/2010	9:21:00	34.0456	-117.27285	474816.3301	3767245.605	104.6424824
1693	24	25	8/24/2010	8:39:00	34.045567	-117.27235	474862.4698	3767241.823	111.9819544
1694	24	26	8/26/2010	8:20:00	34.0454	-117.27285	474816.271	3767223.429	126.6488507
1695	24	27	8/31/2010	10:49:00	34.046267	-117.2734	474765.7633	3767319.697	58.60424443
1696	24	28	9/2/2010	8:53:00	34.046267	-117.2734	474765.7633	3767319.697	58.60424443
1697	24	29	9/7/2010	8:36:00	34.046267	-117.2734	474765.7633	3767319.697	58.60424443
1698	24	30	9/9/2010	10:17:00	34.046267	-117.2734	474765.7633	3767319.697	58.60424443
1699	24	31	9/14/2010	10:28:00	34.046267	-117.2734	474765.7633	3767319.697	58.60424443
1700	24	32	9/16/2010	7:24:00	34.046267	-117.2734	474765.7633	3767319.697	58.60424443
1701	24	33	9/21/2010	8:10:00	34.046467	-117.2737	474738.1332	3767341.947	72.86533454
1702	24	34	9/23/2010	8:39:00	34.046717	-117.274133	474698.2425	3767369.774	73.62786051
1703	24	35	9/27/2010	9:30:00	34.046383	-117.274233	474688.9135	3767332.765	109.7941339
1704	24	36	9/29/2010	7:41:00	34.045967	-117.274667	474648.7323	3767286.746	170.0484724
1705	24	37	10/4/2010	11:18:00	34.044983	-117.27245	474853.0675	3767177.094	173.5769497
1706	24	38	10/11/2010	9:03:00	34.045617	-117.272733	474827.1341	3767247.461	101.8450932
1707	24	39	10/13/2010	9:13:00	34.045933	-117.272867	474814.8595	3767282.532	68.59024808
1708	24	40	10/18/2010	9:12:00	34.046083	-117.273183	474785.7376	3767299.242	64.44473884
1709	24	41	10/27/2010	10:22:00	34.0457	-117.27455	474659.4518	3767257.113	181.0775483
1710	24	42	11/3/2010	10:51:00	34.045467	-117.2744	474673.2274	3767231.241	186.6102416
1711	24	43	11/12/2010	10:37:00	34.045467	-117.2744	474673.2274	3767231.241	186.6102416
1712	24	44	11/17/2010	8:40:00	34.045467	-117.2744	474673.2274	3767231.241	186.6102416
1713	24	45	12/1/2010	7:52:00	34.045467	-117.2744	474673.2274	3767231.241	186.6102416
1714	25	Release	4/22/2010	12:27:00	34.04538	-117.27445	474668.5866	3767221.607	191.1541017
1715	25	1	4/27/2010	13:08:00	34.044917	-117.276067	474519.2004	3767170.671	33.38244744
1716	25	2	4/29/2010	9:53:00	34.044917	-117.276067	474519.2004	3767170.671	33.38244744
1717	25	3	5/4/2010	11:16:00	34.044917	-117.276067	474519.2004	3767170.671	33.38244744
1718	25	4	5/6/2010	12:10:00	34.044917	-117.276067	474519.2004	3767170.671	33.38244744
1719	25	5	5/11/2010	12:39:00	34.044917	-117.276067	474519.2004	3767170.671	33.38244744
1720	25	6	5/13/2010	11:55:00	34.044917	-117.276067	474519.2004	3767170.671	33.38244744
1721	25	7	5/18/2010	10:32:00	34.044917	-117.276067	474519.2004	3767170.671	33.38244744
1722	25	8	5/20/2010	14:17:00	34.044917	-117.276067	474519.2004	3767170.671	33.38244744
1723	25	9	5/25/2010	10:58:00	34.044917	-117.276067	474519.2004	3767170.671	33.38244744
1724	25	10	5/25/2010	15:10:00	34.04435	-117.27635	474492.9099	3767107.873	54.45087811
1725	25	11	6/1/2010	13:00:00	34.0438	-117.27845	474298.9135	3767047.414	139.4924479
1726	25	12	6/3/2010	13:20:00	34.0438	-117.27845	474298.9135	3767047.414	139.4924479
1727	25	13	6/10/2010	9:41:00	34.0438	-117.27845	474298.9135	3767047.414	139.4924479
1728	25	14	6/17/2010	9:53:00	34.042917	-117.278367	474306.3082	3766949.487	115.0747991
1729	25	15	6/23/2010	10:48:00	34.0432	-117.2779	474349.4983	3766980.749	162.6483472
1730	25	16	6/28/2010	9:35:00	34.043283	-117.278133	474328.0171	3766990.01	144.5012187
1731	25	17	6/30/2010	12:11:00	34.0429	-117.279617	474190.9258	3766947.917	4.1069015
1732	25	Relocate	6/30/2010	12:34:00	34.045983	-117.275217	474597.9729	3767288.657	139.154321
1733	25	18	7/6/2010	17:08:00	34.046317	-117.276683	474462.7636	3767326.055	46.01473036
1734	25	19	7/8/2010	18:28:00	34.046283	-117.277167	474418.0811	3767322.406	47.93761356
1735	25	Relocate	7/8/2010	18:34:00	34.0471	-117.27585	474539.8819	3767412.666	74.56837894
1736	25	20	7/15/2010	7:20:00	34.047133	-117.272567	474842.9034	3767415.513	6.609008651
1737	25	Relocate	7/15/2010	7:31:00	34.045917	-117.274583	474656.4705	3767281.182	170.6816425
1738	25	21	7/20/2010	9:19:00	34.045217	-117.27415	474696.2279	3767203.459	192.3653455
1739	25	22	7/22/2010	7:45:00	34.045217	-117.27415	474696.2279	3767203.459	192.3653455
1740	25	23	7/27/2010	7:30:00	34.045217	-117.27415	474696.2279	3767203.459	192.3653455
1741	25	24	7/29/2010	7:56:00	34.045217	-117.27415	474696.2279	3767203.459	192.3653455
1742	25	25	8/5/2010	9:26:00	34.045233	-117.274167	474694.6635	3767205.237	191.85416
1743	25	26	8/10/2010	10:24:00	34.04655	-117.272383	474859.7141	3767350.826	26.31039757
1744	25	27	8/12/2010	7:36:00	34.04655	-117.272383	474859.7141	3767350.826	26.31039757
1745	25	28	8/17/2010	7:57:00	34.04645	-117.272317	474865.7762	3767339.721	36.22853396
1746	25	Relocate	8/17/2010	8:04:00	34.045683	-117.274567	474657.8777	3767255.232	183.4401373
1747	25	29	8/19/2010	10:20:00	34.04535	-117.274483	474665.5318	3767218.288	187.2295794
1748	25	30	8/24/2010	9:46:00	34.045117	-117.27425	474686.9682	3767192.396	202.3008068
1749	25	31	8/26/2010	8:39:00	34.045283	-117.273333	474771.6559	3767210.575	150.7588901
1750	25	32	8/31/2010	10:34:00	34.045283	-117.27335	474770.0868	3767210.579	151.3778907
1751	25	33	9/2/2010	8:32:00	34.045283	-117.27335	474770.0868	3767210.579	151.3778907
1752	25	34	9/7/2010	8:24:00	34.045217	-117.27335	474770.0673	3767203.261	158.1158464
1753	25	35	9/9/2010	8:34:00	34.045217	-117.27335	474770.0673	3767203.261	158.1158464
1754	25	36	9/14/2010	10:18:00	34.04485	-117.272383	474859.2124	3767162.331	189.0524785
1755	25	37	9/16/2010	7:40:00	34.044133	-117.2732	474783.5913	3767083.031	270.3654533
1756	25	38	9/21/2010	8:24:00	34.045267	-117.273183	474785.4961	3767208.764	147.606297
1757	25	39	9/23/2010	9:08:00	34.045317	-117.273933	474716.2865	3767214.493	171.9540021
1758	25	40	9/27/2010	10:10:00	34.045317	-117.273933	474716.2865	3767214.493	171.9540021
1759	25	41	9/29/2010	8:27:00	34.045317	-117.273933	474716.2865	3767214.493	171.9540021
1760	25	42	10/4/2010	10:44:00	34.044867	-117.27285	474816.1134	3767164.331	185.4923095
1761	25	43	10/11/2010	8:48:00	34.044867	-117.27285	474816.1134	3767164.331	185.4923095
1762	25	44	10/13/2010	9:01:00	34.044867	-117.27285	474816.1134	3767164.331	185.4923095
1763	25	45	10/18/2010	9:00:00	34.044867	-117.27285	474816.1134	3767164.331	185.4923095
1764	25	46	10/27/2010	8:45:00	34.044867	-117.27285	474816.1134	3767164.331	185.4923095
1765	25	47	11/3/2010	11:47:00	34.044867	-117.27285	474816.1134	3767164.331	185.4923095
1766	25	48	11/12/2010	10:18:00	34.044867	-117.27285	474816.1134	3767164.331	185.4923095
1767	25	49	11/19/2010	8:52:00	34.044867	-117.27285	474816.1134	3767164.331	185.4923095
1768	25	50	12/1/2010	8:39:00	34.044867	-117.27285	474816.1134	3767164.331	185.4923095
1769	25	51	12/8/2010	9:54:00	34.044867	-117.27285	474816.1134	3767164.331	185.4923095
1770	25	52	12/15/2010	9:07:00	34.044867	-117.27285	474816.1134	3767164.331	185.4923095
1771	25	53	12/30/2010	12:12:00	34.044867	-117.27285	474816.1134	3767164.331	185.4923095
1772	25	54	1/6/2011	9:17:00	34.044867	-117.27285	474816.1134	3767164.331	185.4923095
1773	25	55	1/13/2011	9:20:00	34.044867	-117.27285	474816.1134	3767164.331	185.4923095
1774	25	56	1/20/2011	8:38:00	34.044767	-117.272883	474813.038	3767153.251	196.7934207
1775	25	57	1/27/2011	9:12:00	34.044767	-117.272883	474813.038	3767153.251	196.7934207
1776	25	58	2/3/2011	9:28:00	34.044767	-117.272883	474813.038	3767153.251	196.7934207
1777	25	59	2/10/2011	9:14:00	34.044817	-117.2728	474820.7137	3767158.774	190.7333167
1778	25	60	2/17/2011	9:06:00	34.044817	-117.2728	474820.7137	3767158.774	190.7333167
1779	25	61	2/24/2011	8:50:00	34.044817	-117.2728	474820.7137	3767158.774	190.7333167
1780	25	62	3/3/2011	9:50:00	34.044817	-117.2728	474820.7137	3767158.774	190.7333167
1781	25	63	3/10/2011	9:29:00	34.044817	-117.2728	474820.7137	3767158.774	190.7333167
1782	25	64	3/15/2011	9:07:00	34.044767	-117.272883	474813.038	3767153.251	196.7934207
1783	25	65	3/17/2011	9:59:00	34.044767	-117.272883	474813.038	3767153.251	196.7934207
1784	25	66	3/22/2011	10:02:00	34.044767	-117.272883	474813.038	3767153.251	196.7934207
1785	25	67	3/24/2011	11:18:00	34.044767	-117.272883	474813.038	3767153.251	196.7934207
1786	25	68	3/29/2011	9:32:00	34.044767	-117.272883	474813.038	3767153.251	196.7934207
1787	25	69	3/31/2011	10:21:00	34.044767	-117.272883	474813.038	3767153.251	196.7934207
1788	25	70	4/5/2011	9:32:00	34.044917	-117.273133	474790.0074	3767169.944	183.8818285
1789	25	71	4/12/2011	9:30:00	34.044849	-117.273067	474796.0791	3767162.388	190.0536459
1790	25	72	4/14/2011	10:20:00	34.044849	-117.273067	474796.0791	3767162.388	190.0536459
1791	25	73	4/19/2011	9:55:00	34.045	-117.273033	474799.262	3767179.123	173.0188089
1792	25	74	4/21/2011	10:01:00	34.044817	-117.272817	474819.1446	3767158.778	190.8189019
1793	25	75	4/26/2011	10:05:00	34.045183	-117.274533	474660.8671	3767199.784	177.9605989
1794	25	76	4/28/2011	12:50:00	34.045317	-117.273917	474717.7633	3767214.489	171.1666834
1795	25	77	5/3/2011	13:01:00	34.04575	-117.2723	474867.1388	3767262.102	94.40309795
1796	25	78	5/10/2011	10:10:00	34.044917	-117.273167	474786.8693	3767169.953	184.5949563
1797	25	79	5/19/2011	9:46:00	34.044917	-117.27235	474862.278	3767169.752	182.2231925
1798	25	80	6/8/2011	8:53:00	34.045333	-117.2721	474885.4756	3767215.816	144.1838503
1799	25	81	6/15/2011	12:18:00	34.045067	-117.272567	474842.2933	3767186.437	163.2061122
1800	25	82	6/22/2011	9:01:00	34.0455	-117.271983	474896.3238	3767234.304	132.2907069
1801	25	Release	7/13/2011	7:55:00	34.045357	-117.272731	474827.2419	3767218.632	130.6563725
1802	25	83	7/26/2011	9:26:00	34.045317	-117.272667	474833.1372	3767214.181	135.0782277
1803	25	84	8/12/2011	8:47:00	34.044917	-117.272833	474817.6973	3767169.87	179.8487768
1804	25	85	8/19/2011	9:49:00	34.044783	-117.272567	474842.2094	3767154.947	194.6258707
1805	25	86	8/28/2011	9:06:00	34.045368	-117.271873	474906.4378	3767219.641	150.0457419
1806	25	87	9/6/2011	8:47:00	34.0445	-117.27285	474816.005	3767123.638	226.0873039
1807	25	88	9/13/2011	9:47:00	34.04435	-117.272867	474814.3915	3767107.01	242.7858538
1808	25	89	9/19/2011	9:24:00	34.044776	-117.275061	474612.0118	3767154.787	125.255348
1809	25	90	9/26/2011	9:48:00	34.045633	-117.273667	474740.9318	3767249.465	129.228745
1810	25	91	10/3/2011	8:46:00	34.045633	-117.273667	474740.9318	3767249.465	129.228745
1811	25	92	10/11/2011	8:59:00	34.045161	-117.274645	474650.5231	3767197.372	167.3404004
1812	26	Capture	4/22/2010	14:28:00	34.04375	-117.269367	475137.2671	3767039.627	30.35495634
1813	26	Release	4/23/2010	15:30:00	34.043765	-117.269322	475141.425	3767041.279	25.8871069
1814	26	1	4/27/2010	12:12:00	34.044183	-117.26945	475129.7326	3767087.658	13.82234609
1815	26	2	4/29/2010	11:28:00	34.044183	-117.26945	475129.7326	3767087.658	13.82234609
1816	26	3	5/4/2010	12:15:00	34.044417	-117.269517	475123.6168	3767113.62	19.19094124
1817	26	4	5/6/2010	11:05:00	34.044467	-117.269483	475126.7696	3767119.155	15.87911229
1818	26	5	5/11/2010	10:54:00	34.044467	-117.269483	475126.7696	3767119.155	15.87911229
1819	26	6	5/13/2010	10:28:00	34.044467	-117.269483	475126.7696	3767119.155	15.87911229
1820	26	7	5/18/2010	12:20:00	34.044217	-117.269633	475112.8515	3767091.472	29.91857896
1821	26	8	5/20/2010	12:25:00	34.04525	-117.26935	475139.274	3767205.942	14.95794126
1822	26	Relocate	5/20/2010	12:30:00	34.044809	-117.270426	475039.8308	3767157.306	105.153116
1823	26	9	5/25/2010	12:06:00	34.044467	-117.270233	475057.5445	3767119.338	85.10160985
1824	26	10	5/27/2010	16:13:00	34.044467	-117.270233	475057.5445	3767119.338	85.10160985
1825	26	11	6/1/2010	11:14:00	34.044	-117.270317	475049.6545	3767067.578	96.32592047
1826	26	12	6/3/2010	11:28:00	34.044417	-117.26945	475129.8009	3767113.603	13.26376564
1827	26	13	6/10/2010	11:06:00	34.044483	-117.269283	475145.2342	3767120.881	2.959234016
1828	26	Relocate	6/10/2010	11:11:00	34.044656	-117.270268	475054.3693	3767140.303	89.9218599
1829	26	14	6/17/2010	11:51:00	34.04465	-117.271717	474920.6251	3767139.992	216.8062218
1830	26	15	6/23/2010	8:11:00	34.044717	-117.27165	474926.8289	3767147.404	207.2592664
1831	26	16	6/28/2010	10:07:00	34.044717	-117.27165	474926.8289	3767147.404	207.2592664
1832	26	17	6/30/2010	10:20:00	34.044717	-117.27165	474926.8289	3767147.404	207.2592664
1833	26	18	7/6/2010	19:28:00	34.044717	-117.27165	474926.8289	3767147.404	207.2592664
1834	26	19	7/8/2010	17:38:00	34.044717	-117.271567	474934.4898	3767147.384	201.5424701
1835	26	20	7/15/2010	8:36:00	34.044417	-117.270267	475054.3917	3767113.802	87.98750793
1836	26	21	7/20/2010	7:56:00	34.044633	-117.26945	475129.8639	3767137.553	14.90497735
1837	26	22	7/22/2010	8:59:00	34.044683	-117.2695	475125.2635	3767143.109	21.38685564
1838	26	23	7/27/2010	8:24:00	34.044567	-117.269367	475137.5055	3767130.215	6.946205594
1839	26	24	7/29/2010	8:55:00	34.044919	-117.269353	475138.9005	3767169.241	12.58498367
1840	26	25	8/5/2010	8:26:00	34.04455	-117.2695	475125.2247	3767128.363	19.25460139
1841	26	26	8/10/2010	9:11:00	34.044698	-117.269484	475126.7447	3767144.769	20.79495067
1842	26	27	8/12/2010	7:56:00	34.044721	-117.269388	475135.6122	3767147.296	11.98953634
1843	26	28	8/17/2010	10:15:00	34.044765	-117.269319	475141.9937	3767152.158	3.975320726
1844	26	29	8/19/2010	8:04:00	34.044727	-117.269234	475149.8281	3767147.924	6.897434895
1845	26	30	8/24/2010	6:52:00	34.044759	-117.269287	475144.9456	3767151.485	3.325927405
1846	26	31	8/26/2010	6:49:00	34.044759	-117.269287	475144.9456	3767151.485	3.325927405
1847	26	32	8/31/2010	11:02:00	34.044782	-117.269301	475143.6601	3767154.038	1.507441099
1848	26	33	9/2/2010	8:05:00	34.044667	-117.269233	475149.9029	3767141.271	2.593851729
1849	26	Relocate	9/2/2010	8:10:00	34.044617	-117.269567	475119.0602	3767135.808	25.10023048
1850	26	34	9/7/2010	8:50:00	34.044771	-117.269334	475140.611	3767152.827	4.774962246
1851	26	35	9/9/2010	7:39:00	34.044783	-117.2693	475143.7527	3767154.149	1.371859826
1852	26	36	9/14/2010	9:35:00	34.044717	-117.269283	475145.3025	3767146.827	5.696781229
1853	26	37	9/16/2010	9:11:00	34.044833	-117.269233	475149.9513	3767159.676	0.923041529
1854	26	38	9/21/2010	8:37:00	34.044717	-117.2694	475134.5034	3767146.855	13.13461531
1855	26	39	9/23/2010	9:27:00	34.044617	-117.26945	475129.8592	3767135.779	14.43576235
1856	26	40	9/27/2010	9:12:00	34.044717	-117.269467	475128.3193	3767146.871	18.43273783
1857	26	41	9/29/2010	9:01:00	34.044893	-117.269364	475137.8776	3767166.361	13.44731696
1858	26	42	10/4/2010	8:30:00	34.045066	-117.269301	475143.7429	3767185.528	8.022537368
1859	26	43	10/11/2010	9:54:00	34.044732	-117.269225	475150.6603	3767148.476	7.345399665
1860	26	44	10/13/2010	10:13:00	34.044776	-117.269339	475140.1509	3767153.382	5.011441765
1861	26	45	10/18/2010	10:02:00	34.045233	-117.269117	475160.7747	3767204	6.861285349
1862	26	46	10/27/2010	9:28:00	34.045147	-117.269164	475156.4116	3767194.476	1.44127192
1863	26	47	11/3/2010	8:29:00	34.044817	-117.269217	475151.4235	3767157.899	2.528591441
1864	26	48	11/12/2010	9:14:00	34.044817	-117.269217	475151.4235	3767157.899	2.528591441
1865	26	49	11/19/2010	9:38:00	34.044817	-117.269217	475151.4235	3767157.899	2.528591441
1866	26	50	12/1/2010	9:45:00	34.044817	-117.269217	475151.4235	3767157.899	2.528591441
1867	26	51	12/8/2010	8:42:00	34.044817	-117.269217	475151.4235	3767157.899	2.528591441
1868	26	52	12/15/2010	10:46:00	34.044817	-117.269217	475151.4235	3767157.899	2.528591441
1869	26	53	12/30/2010	12:33:00	34.044817	-117.269217	475151.4235	3767157.899	2.528591441
1870	26	54	1/6/2011	9:46:00	34.044817	-117.269217	475151.4235	3767157.899	2.528591441
1871	26	55	1/13/2011	9:44:00	34.044817	-117.269217	475151.4235	3767157.899	2.528591441
1872	26	56	1/20/2011	9:06:00	34.044817	-117.269217	475151.4235	3767157.899	2.528591441
1873	26	57	1/27/2011	9:52:00	34.044817	-117.269217	475151.4235	3767157.899	2.528591441
1874	26	58	2/3/2011	8:40:00	34.044817	-117.269217	475151.4235	3767157.899	2.528591441
1875	26	59	2/10/2011	10:10:00	34.044817	-117.269217	475151.4235	3767157.899	2.528591441
1876	26	60	2/17/2011	9:43:00	34.044817	-117.269217	475151.4235	3767157.899	2.528591441
1877	26	61	2/24/2011	9:18:00	34.044817	-117.269217	475151.4235	3767157.899	2.528591441
1878	26	62	3/3/2011	8:32:00	34.044817	-117.269217	475151.4235	3767157.899	2.528591441
1879	26	63	3/10/2011	10:10:00	34.044817	-117.269233	475149.9467	3767157.902	1.426159774
1880	26	64	3/15/2011	10:21:00	34.044817	-117.269233	475149.9467	3767157.902	1.426159774
1881	26	Relocate	3/15/2011	10:29:00	34.0444	-117.270117	475068.2317	3767111.881	74.0728089
1882	26	65	3/17/2011	9:17:00	34.04405	-117.26945	475129.6937	3767072.911	23.36402477
1883	26	66	3/22/2011	11:46:00	34.0442	-117.269483	475126.6916	3767089.551	16.2977209
1884	26	67	3/24/2011	9:52:00	34.0442	-117.269483	475126.6916	3767089.551	16.2977209
1885	26	68	3/29/2011	10:56:00	34.0442	-117.269483	475126.6916	3767089.551	16.2977209
1886	26	69	3/31/2011	8:45:00	34.044467	-117.2695	475125.2005	3767119.16	17.44788932
1887	26	70	4/5/2011	11:17:00	34.044467	-117.2695	475125.2005	3767119.16	17.44788932
1888	26	71	4/12/2011	11:37:00	34.044467	-117.2695	475125.2005	3767119.16	17.44788932
1889	26	72	4/14/2011	10:03:00	34.044467	-117.2695	475125.2005	3767119.16	17.44788932
1890	26	73	4/19/2011	10:13:00	34.045383	-117.269567	475119.2839	3767220.741	6.355126402
1891	26	74	4/21/2011	8:30:00	34.045233	-117.271383	474951.6246	3767204.552	153.5019979
1892	26	75	4/26/2011	12:05:00	34.04495	-117.27205	474889.9776	3767173.337	185.5834399
1893	26	76	4/28/2011	12:01:00	34.044717	-117.271533	474937.628	3767147.375	199.238892
1894	26	77	5/3/2011	10:44:00	34.044933	-117.271667	474925.3234	3767171.358	193.6654895
1895	26	78	5/10/2011	10:59:00	34.044817	-117.269367	475137.5785	3767157.935	8.010148188
1896	26	Relocate	5/10/2011	11:09:00	34.0449	-117.270667	475017.6132	3767167.455	119.9346946
1897	26	79	5/10/2011	16:43:00	34.046183	-117.26995	475084.1673	3767309.538	3.134758211
1898	26	Relocate	5/10/2011	16:48:00	34.044883	-117.270633	475020.7464	3767165.561	117.9801598
1899	26	80	5/19/2011	10:58:00	34.045339	-117.269427	475132.1929	3767215.829	5.776136065
1900	26	Relocate	5/19/2011	10:58:00	34.044867	-117.270633	475020.7418	3767163.787	118.8091316
1901	26	81	6/8/2011	9:31:00	34.045183	-117.269167	475156.1452	3767198.468	2.565000683
1902	26	Relocate	6/8/2011	9:35:00	34.04485	-117.27055	475028.3976	3767161.882	113.0755652
1903	26	82	6/15/2011	11:25:00	34.045402	-117.269595	475116.705	3767222.855	7.767383391
1904	26	83	6/22/2011	9:41:00	34.045402	-117.269595	475116.705	3767222.855	7.767383391
1905	26	Release	6/30/2011	7:23:00	34.044844	-117.270668	475017.5045	3767161.246	122.8636354
1906	26	84	7/7/2011	10:36:00	34.044606	-117.269472	475127.8254	3767134.565	16.2497174
1907	26	85	7/15/2011	7:39:00	34.04435	-117.2694	475134.3963	3767106.162	8.358570586
1908	26	86	7/26/2011	18:18:00	34.044053	-117.269276	475145.7549	3767073.201	16.28858913
1909	26	87	8/4/2011	18:51:00	34.044633	-117.269533	475122.203	3767137.574	22.29866945
1910	26	88	8/14/2011	10:25:00	34.044733	-117.269215	475151.5836	3767148.584	6.41580667
1911	26	89	8/21/2011	10:08:00	34.04475	-117.2691	475162.203	3767150.441	4.38815453
1912	26	90	8/26/2011	7:16:00	34.04475	-117.2691	475162.203	3767150.441	4.38815453
1913	26	91	9/2/2011	7:33:00	34.044755	-117.269235	475149.744	3767151.028	6.103407553
1914	26	92	9/12/2011	8:18:00	34.044175	-117.26949	475126.0382	3767086.78	17.60239152
1915	26	93	9/20/2011	8:56:00	34.045446	-117.269103	475162.129	3767227.614	2.033598151
1916	26	94	9/27/2011	8:26:00	34.045598	-117.269092	475163.1886	3767244.465	2.49012476
1917	26	Relocate	9/27/2011	8:31:00	34.044767	-117.27035	475046.8333	3767152.63	98.1452444
1918	26	95	10/4/2011	8:16:00	34.04472	-117.269457	475129.2432	3767147.202	17.45664859
1919	26	96	10/12/2011	9:20:00	34.045516	-117.269095	475162.8878	3767235.374	8.136785398
1920	26	97	10/17/2011	8:38:00	34.045572	-117.269219	475151.4591	3767241.613	10.6123377
1921	26	98	10/24/2011	8:13:00	34.045472	-117.269106	475161.8597	3767230.498	3.280547646
1922	26	99	10/26/2011	8:24:00	34.045401	-117.269083	475163.9619	3767222.62	1.156539409
1923	26	100	10/31/2011	8:31:00	34.04525	-117.26918	475154.9648	3767205.9	3.505663051
1924	26	101	11/8/2011	8:19:00	34.044788	-117.269263	475147.1692	3767154.694	2.217973639
1925	26	102	12/5/2011	7:32:00	34.044788	-117.269263	475147.1692	3767154.694	2.217973639
1926	26	103	12/30/2011	7:59:00	34.044788	-117.269263	475147.1692	3767154.694	2.217973639
1927	27	Capture	4/26/2010	16:13:00	34.042179	-117.268207	475243.8796	3766865.154	3.718675138
1928	27	Release	6/3/2010	10:25:00	34.043567	-117.269633	475112.6616	3767019.401	61.67723571
1929	27	1	6/10/2010	11:55:00	34.044739	-117.269442	475130.6333	3767149.305	15.34296055
1930	27	2	6/17/2010	12:46:00	34.043683	-117.269333	475140.3858	3767032.19	31.63920895
1931	27	3	6/23/2010	9:30:00	34.043717	-117.26935	475138.8266	3767035.964	30.71091281
1932	27	4	6/28/2010	12:15:00	34.04375	-117.269417	475132.6521	3767039.639	34.60427906
1933	27	5	6/30/2010	8:59:00	34.04375	-117.269417	475132.6521	3767039.639	34.60427906
1934	27	6	7/6/2010	18:17:00	34.043733	-117.269367	475137.2622	3767037.742	31.18696162
1935	27	7	7/7/2010	16:27:00	34.0442	-117.269433	475131.3066	3767089.538	11.7763115
1936	27	8	7/15/2010	9:38:00	34.043567	-117.269433	475131.1218	3767019.352	47.11132109
1937	27	9	7/20/2010	8:10:00	34.044167	-117.269333	475140.527	3767085.855	6.802026933
1938	27	10	7/22/2010	9:40:00	34.044167	-117.269333	475140.527	3767085.855	6.802026933
1939	27	11	7/27/2010	8:57:00	34.0435	-117.2691	475161.8386	3767011.842	18.79816084
1940	27	12	7/29/2010	9:09:00	34.0435	-117.2691	475161.8386	3767011.842	18.79816084
1941	27	13	8/2/2010	20:12:00	34.04294	-117.268471	475219.7331	3766949.597	1.57308497
1942	27	Relocate	8/5/2010	7:42:00	34.043671	-117.269619	475113.9842	3767030.929	55.17666071
1943	27	14	8/10/2010	8:44:00	34.044067	-117.2695	475125.0837	3767074.808	24.85366341
1944	27	15	8/12/2010	8:34:00	34.044117	-117.269383	475135.8974	3767080.323	13.78628974
1945	27	16	8/17/2010	10:55:00	34.044683	-117.269467	475128.3094	3767143.101	18.77587073
1946	27	17	8/19/2010	8:55:00	34.043833	-117.2694	475134.2454	3767048.838	30.83611526
1947	27	18	8/24/2010	7:49:00	34.043667	-117.269317	475141.8579	3767030.412	31.70700087
1948	27	19	8/26/2010	7:24:00	34.0439	-117.269017	475169.6161	3767056.174	6.172088903
1949	27	20	8/31/2010	11:28:00	34.04375	-117.269367	475137.2671	3767039.627	30.35495634
1950	27	21	9/2/2010	7:25:00	34.044117	-117.269533	475122.0523	3767080.36	23.89285516
1951	27	22	9/7/2010	9:04:00	34.043667	-117.269	475171.1173	3767030.335	10.28854968
1952	27	23	9/9/2010	7:47:00	34.043667	-117.269	475171.1173	3767030.335	10.28854968
1953	27	24	9/14/2010	9:16:00	34.043667	-117.269	475171.1173	3767030.335	10.28854968
1954	27	25	9/16/2010	9:50:00	34.043833	-117.26905	475166.5507	3767048.753	3.817561224
1955	27	26	9/21/2010	9:33:00	34.043883	-117.269017	475169.6112	3767054.289	5.157390027
1956	27	27	9/23/2010	9:50:00	34.043883	-117.269017	475169.6112	3767054.289	5.157390027
1957	27	28	9/27/2010	8:36:00	34.043883	-117.269017	475169.6112	3767054.289	5.157390027
1958	27	29	9/29/2010	9:19:00	34.043883	-117.269017	475169.6112	3767054.289	5.157390027
1959	27	30	10/4/2010	9:14:00	34.043883	-117.269017	475169.6112	3767054.289	5.157390027
1960	27	31	10/11/2010	10:43:00	34.043733	-117.268867	475183.4126	3767037.62	7.37146419
1961	27	Relocate	10/11/2010	10:47:00	34.043467	-117.269683	475108.0174	3767008.325	71.83288218
1962	27	32	10/13/2010	10:36:00	34.042317	-117.268317	475233.7665	3766880.482	1.726246632
1963	27	Relocate	10/13/2010	10:42:00	34.04345	-117.26965	475111.0583	3767006.432	69.82062089
1964	27	33	10/18/2010	10:20:00	34.043633	-117.269267	475146.4631	3767026.63	31.07704304
1965	27	34	10/27/2010	9:42:00	34.043633	-117.269267	475146.4631	3767026.63	31.07704304
1966	27	35	11/3/2010	8:56:00	34.043633	-117.269267	475146.4631	3767026.63	31.07704304
1967	27	36	11/12/2010	9:22:00	34.043633	-117.269267	475146.4631	3767026.63	31.07704304
1968	27	37	11/19/2010	9:48:00	34.043633	-117.269267	475146.4631	3767026.63	31.07704304
1969	27	38	12/1/2010	9:54:00	34.043633	-117.269267	475146.4631	3767026.63	31.07704304
1970	27	39	12/8/2010	8:50:00	34.043633	-117.269267	475146.4631	3767026.63	31.07704304
1971	27	40	12/15/2010	10:54:00	34.043633	-117.269267	475146.4631	3767026.63	31.07704304
1972	27	41	12/30/2010	12:39:00	34.043633	-117.269267	475146.4631	3767026.63	31.07704304
1973	27	42	1/6/2011	9:55:00	34.043633	-117.269267	475146.4631	3767026.63	31.07704304
1974	27	43	1/13/2011	8:35:00	34.043633	-117.269267	475146.4631	3767026.63	31.07704304
1975	27	44	1/20/2011	9:13:00	34.043633	-117.269267	475146.4631	3767026.63	31.07704304
1976	27	45	1/27/2011	10:00:00	34.043633	-117.269267	475146.4631	3767026.63	31.07704304
1977	27	46	2/3/2011	10:00:00	34.043633	-117.269267	475146.4631	3767026.63	31.07704304
1978	27	47	2/10/2011	10:21:00	34.043633	-117.269267	475146.4631	3767026.63	31.07704304
1979	27	48	2/17/2011	9:56:00	34.043633	-117.269267	475146.4631	3767026.63	31.07704304
1980	27	49	3/3/2011	8:46:00	34.043633	-117.269267	475146.4631	3767026.63	31.07704304
1981	27	50	3/10/2011	10:34:00	34.043633	-117.269267	475146.4631	3767026.63	31.07704304
1982	27	51	3/15/2011	10:46:00	34.04415	-117.269367	475137.3839	3767083.978	9.890515846
1983	27	52	3/17/2011	9:28:00	34.043998	-117.26938	475136.1396	3767067.128	26.00882434
1984	27	53	3/22/2011	11:38:00	34.044033	-117.269467	475128.1197	3767071.03	25.80486042
1985	27	54	3/24/2011	10:01:00	34.044	-117.26945	475129.6791	3767067.367	28.13827643
1986	27	55	3/29/2011	11:05:00	34.044	-117.26945	475129.6791	3767067.367	28.13827643
1987	27	56	3/31/2011	9:00:00	34.04375	-117.26925	475148.0663	3767039.598	21.02346478
1988	27	57	4/5/2011	10:58:00	34.04375	-117.26925	475148.0663	3767039.598	21.02346478
1989	27	58	4/12/2011	11:21:00	34.0436	-117.26915	475157.2527	3767022.942	24.27582193
1990	27	59	4/14/2011	9:49:00	34.0436	-117.26925	475148.0226	3767022.966	32.36490862
1991	27	60	4/19/2011	10:47:00	34.043967	-117.26935	475138.8996	3767063.683	26.12210961
1992	27	61	4/21/2011	8:57:00	34.043767	-117.269333	475140.4103	3767041.503	26.72019292
1993	27	62	5/24/2011	9:40:00	34.04065	-117.264733	475564.1001	3766694.785	101.6118934
1994	27	Release	6/15/2011	9:39:00	34.04348	-117.269724	475104.2368	3767009.776	74.02121407
1995	27	63	6/22/2011	10:53:00	34.042059	-117.268324	475233.0453	3766851.877	8.650275877
1996	27	64	6/30/2011	8:11:00	34.041833	-117.26825	475239.8101	3766826.8	15.71262264
1997	27	65	7/7/2011	9:47:00	34.041833	-117.26825	475239.8101	3766826.8	15.71262264
1998	27	66	7/15/2011	8:40:00	34.040717	-117.266967	475357.9119	3766702.75	69.17680351
1999	27	67	7/26/2011	19:56:00	34.04091	-117.266017	475445.6565	3766723.921	17.61144828
[truncated: 392 more rows]
